# Supplementary material for: Synthetic Physical Interactions Map Kinetochore-Checkpoint Activation Regions
Source: Oxford University Press journal article supplement (doi:10.1534/g3.116.031930), 2016-08-01
Supplement: 031930_figures3.pdf [file 031930_figures3.pdf]

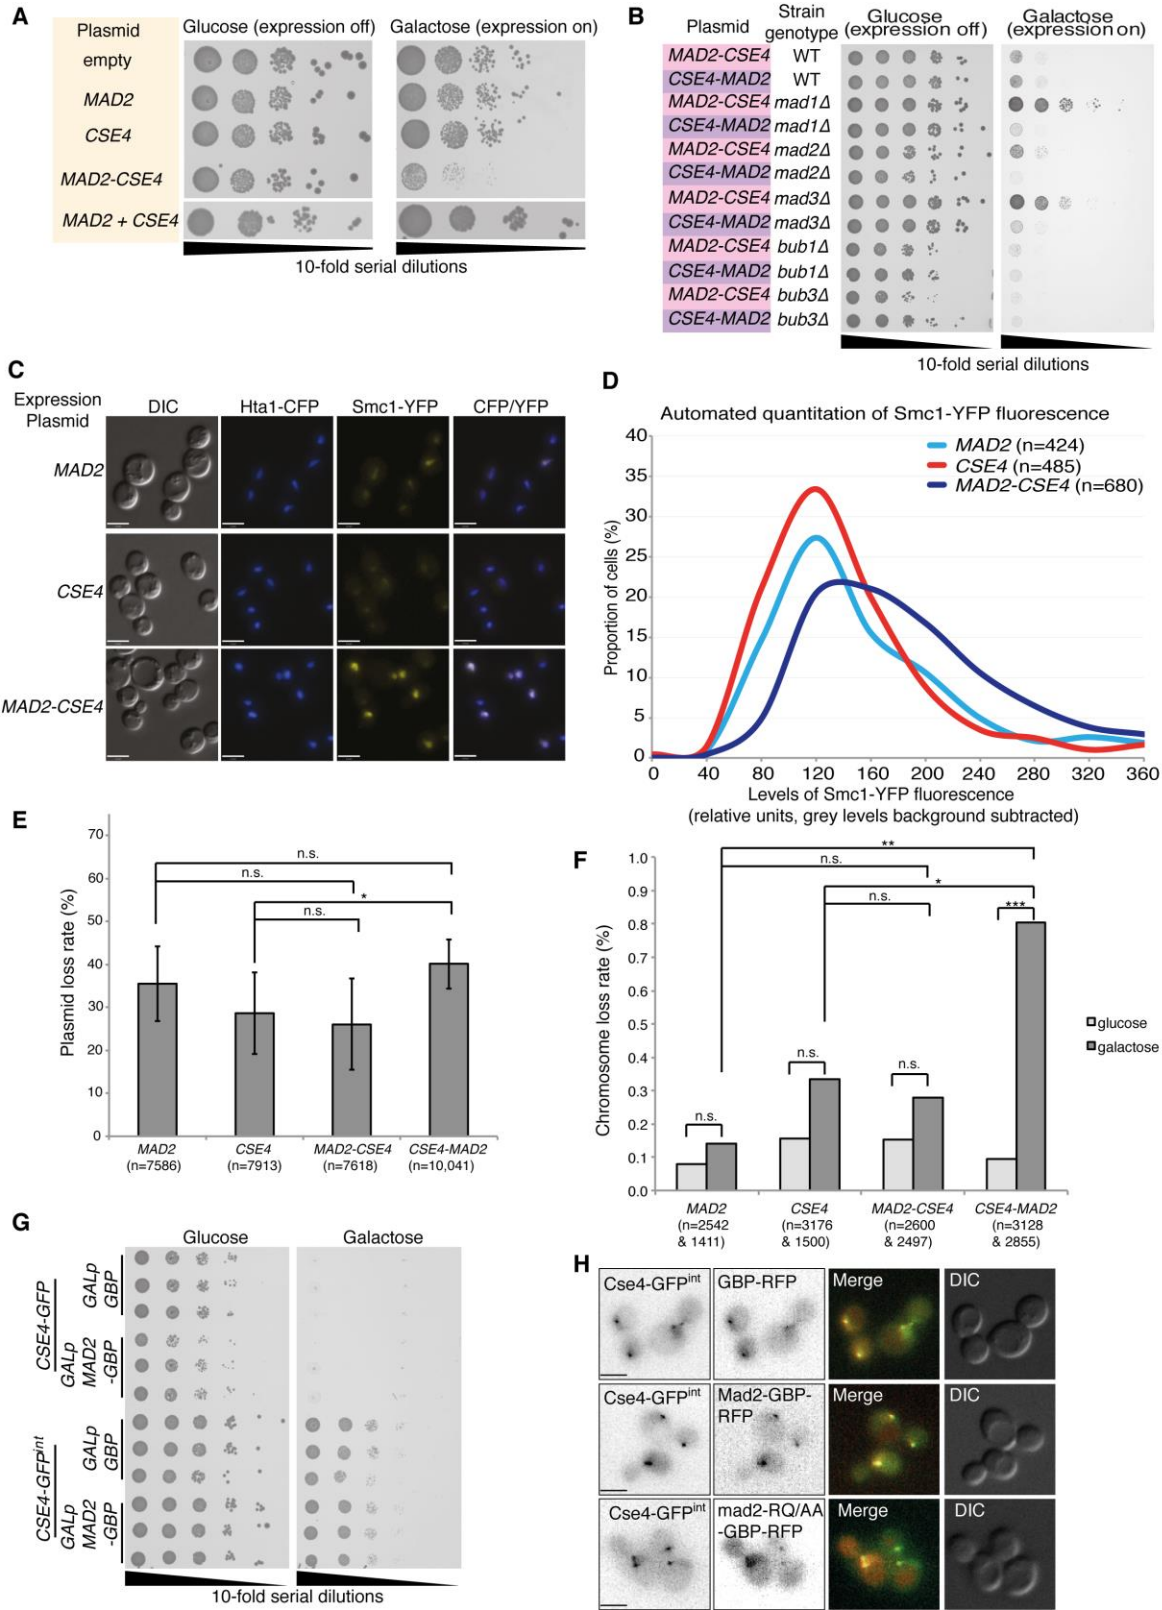

**Figure S3 Analysis of *MAD2-CSE4* direct fusion and Mad2-Cse4 SPI.**

(A) Cells were transformed with plasmids expressing nothing (empty plasmid), *MAD2*, *CSE4* or a direct *MAD2-CSE4* fusion, as well as cells expressing both *MAD2* and *CSE4* together, and plated on glucose and galactose. The latter condition drives expression of the transgene and only the *MAD2-CSE4* fusion restricts growth.

(B) Six strains, wild-type (WT), *mad1Δ*, *mad2Δ*, *mad3Δ*, *bub1Δ* and *bub3Δ*, were transformed with either the *MAD2-CSE4* fusion, as in (A), or the reverse *CSE4-MAD2* fusion. Serial dilution assay shows both fusions inhibit growth when expressed (galactose), but only the *MAD2-CSE4* fusion is suppressed in *mad1Δ* and *mad3Δ* strains.

(C) Expression of *MAD2-CSE4* stabilizes cohesion as shown by fluorescence images of cells encoding tagged histone (Hta1-CFP) and cohesin (Smc1-YFP) expressing *MAD2*, *CSE4* or the *MAD2-CSE4* fusion.

(D) An automated image analysis protocol was used to measure the Smc1-YFP fluorescence using the Hta1-CFP fluorescence as a guide for the nuclear volume. The *MAD2-CSE4* fusion elevates the levels of Smc1 fluorescence compared with controls.

(E) A plasmid-loss assay was performed with *mad3Δ* strains containing the *MAD2*, *CSE4*, *MAD2-CSE4* and *CSE4-MAD2* plasmids along with an empty plasmid with a different selection marker (NAT). The expression of the *MAD2-CSE4* or *CSE4-MAD2* fusions did not significantly increase plasmid loss rate (of the empty NAT plasmid) compared to the expression of *MAD2* alone.

There was a slight but detectable (\* = *t*-test *p*-value of 0.015) increase in plasmid loss when expressing *CSE4-MAD2* fusion compared to *CSE4* alone, but no difference when the *MAD2-CSE4*

fusion was expressed compared with *CSE4*. Error bars indicate standard deviation of the median and n.s. indicates no statistical difference.

(F) Chromosome-loss assay was performed to assess if cells expressing *MAD2-CSE4* fusions have an increased chromosome-loss rate. Expression of *MAD2* fused to the N terminus of *CSE4* did not increase chromosome loss compared to controls. In contrast, the expression of *MAD2* fused to C terminus of *CSE4* results in significantly increased chromosome-loss rate (\*\* = Fishers exact test  $p$ -value =  $1.6 \times 10^{-5}$ , \*\* =  $p$ -value = 0.004, \* =  $p$ -value = 0.04). n.s. indicates no statistical difference.

(G) Cells encoding either C-terminal or internal GFP-tagged Cse4 were transformed with plasmids with GBP or *MAD2-GBP* and serial dilutions were plated on glucose and galactose. Expression of both GBP and *MAD2-GBP* arrested growth of cells encoding Cse4 with C-terminal GFP tag, but not internal GFP tag.

(H) Images of cells encoding Cse4 with internal GFP tag show that Mad2-GBP, and the mutant control, are colocalized with Cse4. Scale bars are 5  $\mu$ m.
