# Supplementary material for: Synthetic Physical Interactions Map Kinetochore-Checkpoint Activation Regions
Source: G3 (Bethesda). 2016 Jun 8;6(8):2531–42. doi: 10.1534/g3.116.031930 (PMC4978906; doi:10.1534/g3.116.031930)
Supplement: Supplemental Material [file supp_g3.116.031930_FileS1.xlsx]

## Sheet: proteome-wide Mad2 SPI data
Plate	Row	Column	ORF	GBP control Z scores	MAD2 control Z scores	Mean Z score
10	E	16	YGL077C	10.6586	7.17201	8.91532
5	A	12	YHR107C	9.62482	5.56392	7.59437
11	D	3	YML125C	8.26355	6.37979	7.32167
11	N	20	YNL180C	6.60833	7.15775	6.88304
10	F	21	YLL043W	5.57529	7.33947	6.45738
1	O	9	YOR160W	6.52956	6.1561	6.34283
4	A	7	YHR036W	6.47919	5.50603	5.99261
9	B	13	YKL049C	7.39054	3.38888	5.38971
3	H	18	YJL010C	4.14091	6.56444	5.35268
8	I	5	YKL186C	5.28783	4.8788	5.08331
2	D	24	YBR237W	4.37948	5.42551	4.90249
4	L	3	YHR170W	4.8658	4.6429	4.75435
9	H	23	YMR195W	4.33474	4.7104	4.52257
11	B	24	YHR012W	5.28168	3.36166	4.32167
4	G	20	YOL144W	1.77839	6.54109	4.15974
5	A	11	YDR161W	4.68693	3.5558	4.12137
8	A	13	YLR370C	4.78453	2.77108	3.7778
4	F	22	YGL122C	4.15458	3.13575	3.64516
7	C	3	YKL002W	3.81519	3.10373	3.45946
9	K	23	YJL039C	2.09362	4.66092	3.37727
3	F	6	YDR172W	3.83703	2.53133	3.18418
7	N	24	YKL052C	3.75657	2.59599	3.17628
8	A	2	YHR089C	3.58979	2.5837	3.08674
5	F	12	YER043C	3.29673	2.58371	2.94022
10	A	3	YCR028C	2.599	3.10162	2.85031
1	G	12	YGR218W	2.79766	2.88679	2.84223
11	B	18	YOR075W	3.57232	1.95321	2.76276
10	B	18	YPL125W	0.17996	5.22823	2.7041
11	H	15	YLL023C	3.4297	1.93721	2.68345
5	M	13	YDR532C	2.93268	2.40402	2.66835
1	H	18	YPL242C	2.32674	2.81622	2.57148
3	C	14	YJL069C	2.80544	2.27059	2.53801
9	H	17	YDR224C	3.39306	1.5053	2.44918
1	D	24	YDR443C	3.12449	1.76578	2.44514
10	B	8	YIL030C	2.28654	2.44537	2.36596
9	D	15	YOL012C	3.66542	0.95502	2.31022
1	G	15	YJR089W	2.32673	2.26292	2.29482
1	I	20	YJR132W	1.52398	3.05727	2.29062
4	J	21	YKR063C	2.51451	1.96069	2.2376
9	L	16	YJR104C	1.82107	2.6268	2.22394
6	P	2	YBR161W	1.55762	2.88889	2.22325
5	A	6	YGR159C	2.28039	2.0573	2.16884
7	O	20	YBR088C	2.95343	1.3383	2.14586
10	A	12	YGR065C	2.28561	1.96585	2.12573
5	C	15	YIL116W	2.21251	2.02528	2.11889
10	P	21	YNL279W	3.9873	0.238902	2.1131
2	E	15	YMR001C	1.69455	2.50129	2.09792
9	I	15	YOR167C	2.40953	1.65396	2.03174
6	A	1	YJL180C	1.49486	2.55452	2.02469
8	C	14	YGL247W	1.25644	2.78616	2.0213
1	N	18	YGL197W	1.7954	1.91986	1.85763
4	B	1	YPL247C	1.80008	1.9078	1.85394
3	D	6	YLR399C	1.66448	1.99732	1.8309
3	A	16	YNL308C	0.141755	3.5125	1.82713
11	F	23	YBR070C	1.72659	1.92238	1.82449
5	P	2	YDR364C	0.34367	3.30458	1.82413
5	N	15	YNL136W	2.17127	1.4414	1.80633
11	G	8	YEL024W	2.26041	1.34698	1.8037
10	D	1	YLR373C	2.17982	1.38487	1.78234
5	J	10	YOL069W	1.92519	1.62915	1.77717
4	D	1	YCL043C	2.10824	1.37903	1.74363
6	J	10	YDR035W	2.45569	1.02185	1.73877
6	H	16	YOL010W	1.88329	1.58542	1.73436
1	L	22	YMR280C	1.69327	1.77443	1.73385
9	G	10	YJR082C	2.07872	1.38707	1.7329
2	P	24	YIL143C	2.71278	0.734433	1.72361
4	B	10	YNL189W	4.02369	-0.726137	1.64878
4	M	15	YDR190C	1.9828	1.30837	1.64558
5	P	7	YIR012W	0.97857	2.19093	1.58475
6	P	15	YGL157W	1.40876	1.75608	1.58242
8	I	20	YDL064W	1.48115	1.67424	1.57769
5	I	18	YGR122W	1.75273	1.3402	1.54646
4	M	13	YNL317W	1.78852	1.29768	1.5431
11	A	1	YGL054C	2.29872	0.747915	1.52332
9	G	12	YIR009W	3.09274	-0.05337	1.51968
9	G	17	YOL052C-A	2.51987	0.51851	1.51919
5	O	11	YOR063W	1.74731	1.29014	1.51873
1	M	3	YPL183C	2.0283	1.00792	1.51811
12	O	18	YDR395W	1.21	1.8199	1.51495
2	O	22	YPL029W	1.68491	1.3417	1.5133
5	H	14	YOR025W	1.86198	1.13787	1.49993
1	P	14	YNR031C	1.78388	1.20886	1.49636
9	J	16	YIL062C	1.59247	1.38542	1.48894
3	L	9	YIL056W	1.51892	1.42957	1.47424
8	D	11	YPL233W	1.88942	1.04678	1.4681
8	D	21	YER104W	1.29138	1.61517	1.45328
9	H	18	YNL281W	1.10147	1.75937	1.43042
6	N	1	YKL060C	0.718235	2.13152	1.42488
12	G	6	YMR024W	1.53268	1.31667	1.42468
1	P	8	YFL033C	1.01582	1.83268	1.42425
9	E	10	YGR219W	1.62231	1.22299	1.42265
1	E	15	YGR140W	2.60586	0.23929	1.42257
5	K	14	YKL149C	2.06592	0.779123	1.42252
12	I	2	YLR262C-A	2.30743	0.530628	1.41903
12	G	8	YOR117W	1.93302	0.903598	1.41831
2	D	1	YDR385W	1.72042	1.09014	1.40528
12	G	7	YOR117W	1.96962	0.824037	1.39683
2	M	16	YLL008W	1.35124	1.43065	1.39094
1	P	20	YMR190C	1.06143	1.6925	1.37696
5	P	12	YNL166C	1.24121	1.50404	1.37263
2	E	3	YBL097W	1.64438	1.08684	1.36561
12	G	5	YMR024W	1.64625	1.07562	1.36094
12	P	1	YOR260W	1.5158	1.20267	1.35924
1	J	1	YGR270W	1.38073	1.29264	1.33669
2	B	8	YGL180W	1.15001	1.52027	1.33514
5	K	10	YOL022C	0.576438	2.08693	1.33168
8	P	16	YHR038W	1.24459	1.41752	1.33105
11	G	19	YNL247W	2.02641	0.634933	1.33067
1	P	13	YFL008W	1.53341	1.10244	1.31793
12	P	17	YDR395W	0.963997	1.66288	1.31344
1	L	23	YDR507C	0.878178	1.74137	1.30977
3	N	22	YPL104W	1.07048	1.54718	1.30883
9	D	14	YPL037C	1.77643	0.82725	1.30184
9	K	16	YBR262C	1.26211	1.313	1.28756
8	I	4	YDR041W	1.46029	1.11113	1.28571
10	J	20	YNL243W	1.8542	0.71559	1.2849
1	J	23	YER013W	1.02906	1.53588	1.28247
5	A	18	YNL175C	1.00055	1.54347	1.27201
10	A	15	YBR199W	1.63935	0.878895	1.25912
3	B	21	YKR008W	1.59402	0.907925	1.25097
11	I	22	YGL187C	1.25027	1.24715	1.24871
5	B	3	YLR113W	0.92294	1.56779	1.24537
9	G	14	YJR048W	1.35125	1.12622	1.23873
5	L	5	YNR052C	1.23368	1.24118	1.23743
1	M	22	YPL009C	1.04822	1.41878	1.2335
1	B	24	YCR081W	1.24981	1.19014	1.21998
8	M	12	YPL051W	0.961302	1.47358	1.21744
12	P	18	YDR395W	1.42534	1.00019	1.21276
12	O	1	YOR260W	2.08284	0.331643	1.20724
3	D	24	YPR161C	1.06398	1.34749	1.20573
2	F	2	YOR113W	1.27918	1.10725	1.19321
10	B	10	YEL031W	1.87583	0.50718	1.19151
4	H	23	YMR115W	0.96698	1.41019	1.18859
5	K	16	YNR021W	1.0847	1.26851	1.1766
9	E	4	YJL169W	0.17464	2.17291	1.17378
10	G	2	YMR058W	1.84017	0.49675	1.16846
6	J	16	YPL209C	1.88808	0.44462	1.16635
9	F	10	YOR276W	1.47994	0.847328	1.16363
4	O	15	YGL111W	1.63123	0.673933	1.15258
5	H	19	YDL150W	0.994507	1.29262	1.14356
2	K	22	YKL054C	1.09806	1.18272	1.14039
1	I	1	YGR047C	1.08861	1.18986	1.13923
10	B	2	YMR162C	1.63285	0.641615	1.13723
3	P	4	YMR108W	1.25317	1.02124	1.13721
5	M	17	YDR088C	1.21161	1.05418	1.1329
9	F	12	YPR062W	1.7374	0.527807	1.1326
10	N	6	YMR129W	0.401377	1.86124	1.13131
10	N	19	YOL011W	1.36933	0.87066	1.11999
4	G	8	YNL119W	1.11238	1.12569	1.11903
5	I	19	YBL032W	0.938545	1.29849	1.11852
1	M	19	YLR409C	0.495768	1.73953	1.11765
2	P	12	YOR141C	1.38729	0.840248	1.11377
4	P	4	YER054C	0.482743	1.74212	1.11243
5	E	24	YOR173W	0.788663	1.41231	1.10049
9	I	12	YLR204W	1.5694	0.631437	1.10042
2	P	10	YLR045C	1.17221	1.02038	1.09629
6	P	1	YML021C	0.490013	1.70254	1.09628
12	P	23	YGL131C	1.935	0.250435	1.09272
3	B	24	YLR369W	1.32208	0.86303	1.09255
10	B	11	YER001W	0.916435	1.26418	1.09031
11	K	10	YNR049C	1.23137	0.946492	1.08893
9	I	10	YKL061W	1.34269	0.833377	1.08804
10	C	5	YNL283C	1.80062	0.375362	1.08799
5	A	4	YMR067C	1.30684	0.8644	1.08562
12	O	2	YOR260W	1.16002	1.00197	1.08099
5	N	1	YPR163C	0.9143	1.246	1.08015
2	L	11	YLR222C	1.18324	0.961597	1.07242
5	L	8	YJL155C	1.285	0.850625	1.06781
4	E	12	YDL048C	1.65182	0.48374	1.06778
9	O	17	YHR072W-A	1.72267	0.40284	1.06276
3	E	24	YOL115W	1.30814	0.810595	1.05937
2	L	10	YGL014W	0.958065	1.15528	1.05667
8	J	21	YPR107C	1.45722	0.649595	1.05341
1	A	13	YIL130W	2.26203	-0.156982	1.05252
4	C	6	YEL071W	0.929545	1.17277	1.05116
2	O	15	YEL011W	1.13298	0.96726	1.05012
9	H	19	YJL190C	0.981605	1.10851	1.04506
8	J	15	YOR319W	0.976232	1.09696	1.0366
4	C	5	YDR105C	1.06612	1.00367	1.0349
10	P	24	YGL233W	1.75667	0.309113	1.03289
5	B	2	YMR209C	0.934795	1.12421	1.0295
6	H	8	YNL288W	1.28326	0.773212	1.02824
9	F	11	YOR285W	1.30936	0.744082	1.02672
12	O	24	YGL131C	1.10728	0.941122	1.0242
4	D	21	YGL065C	0.60396	1.4412	1.02258
7	G	7	YDR318W	0.69789	1.34173	1.01981
1	E	10	YER111C	1.02748	1.01213	1.0198
10	O	12	YDR497C	1.16796	0.867467	1.01771
3	G	17	YPL128C	1.20846	0.82529	1.01688
10	A	9	YOR320C	1.5561	0.463725	1.00991
7	P	2	YDR075W	0.52028	1.4956	1.00794
8	G	10	YGR078C	1.28375	0.73137	1.00756
1	I	21	YDR069C	0.603498	1.41043	1.00697
9	C	1	YHR001W-A	0.60997	1.40206	1.00602
11	P	23	YAR028W	0.967342	1.03151	0.999426
2	O	18	YOR081C	1.27631	0.719365	0.997838
11	J	3	YBR039W	1.04786	0.945505	0.996683
10	D	4	YDR135C	1.7366	0.249095	0.992847
11	K	16	YLR066W	1.35461	0.630957	0.992784
8	K	24	YHR189W	1.86295	0.118425	0.99069
6	E	18	YDR267C	1.09561	0.88232	0.988966
10	M	19	YFL026W	1.78905	0.179885	0.984468
9	G	15	YLR264W	1.42403	0.53484	0.979437
5	O	3	YJR080C	1.04235	0.909728	0.976036
7	L	9	YMR043W	1.30339	0.64687	0.97513
9	L	11	YBL026W	0.718515	1.22466	0.971589
10	C	16	YDR481C	1.43075	0.510173	0.970463
3	C	24	YNL076W	1.1119	0.828645	0.97027
11	A	22	YPL234C	0.958688	0.981275	0.969981
10	M	18	YOL013C	1.36645	0.570865	0.968657
3	E	7	YOL027C	1.21697	0.715125	0.966046
8	I	2	YKL024C	1.31785	0.61018	0.964015
5	A	17	YHR129C	1.99861	-0.078895	0.959856
6	E	24	YML004C	0.175868	1.73942	0.957644
7	A	19	YGL250W	1.22861	0.682665	0.955636
3	F	24	YDR496C	1.05686	0.853645	0.95525
11	F	17	YPL162C	1.20293	0.707035	0.954983
5	K	3	YHL004W	0.756862	1.14519	0.951025
5	E	1	YKR059W	0.906783	0.994123	0.950453
11	H	24	YBR265W	0.7439	1.15555	0.949723
7	M	7	YPR131C	0.81278	1.08631	0.949544
1	A	22	YLR249W	1.45731	0.435287	0.946296
10	E	19	YOR316C	1.62352	0.267985	0.94575
4	J	14	YOL123W	2.0047	-0.11902	0.942843
9	P	5	YNL081C	0.82761	1.04805	0.937832
1	O	2	YML104C	1.66745	0.207395	0.93742
5	B	4	YLR195C	1.12997	0.73385	0.93191
1	M	2	YPL115C	1.23619	0.622583	0.929385
11	O	17	YGL201C	0.803365	1.05137	0.927369
5	O	2	YIL033C	0.89255	0.958193	0.925371
2	E	20	YDR499W	0.241173	1.60907	0.925121
4	F	11	YER078C	1.66157	0.188615	0.925092
2	N	21	YBR172C	1.12608	0.706385	0.916234
11	P	16	YCR034W	0.983977	0.833225	0.908601
11	H	1	YHR142W	0.8707	0.94329	0.906995
2	C	23	YPL106C	1.61413	0.196935	0.905533
8	H	6	YBR256C	1.46346	0.34409	0.903774
3	O	10	YGR194C	1.17804	0.626055	0.902046
2	A	1	YJL168C	0.493463	1.30922	0.901341
3	P	3	YLR098C	0.95374	0.84781	0.900775
8	L	24	YBR193C	1.73035	0.07013	0.90024
9	D	1	YDR344C	1.75563	0.04353	0.899581
3	F	23	YAL047C	0.46967	1.32603	0.89785
4	P	5	YJL013C	0.168797	1.62051	0.894654
3	H	19	YKL125W	0.75358	1.03436	0.89397
5	J	24	YHR174W	1.18818	0.592825	0.890502
11	F	12	YNR041C	1.27968	0.501275	0.890478
9	N	20	YOR052C	1.30947	0.467245	0.888357
2	F	24	YPL105C	1.08886	0.682465	0.885661
5	P	6	YLR231C	0.53493	1.23545	0.88519
9	E	14	YJL179W	0.58339	1.18383	0.88361
11	H	2	YPR124W	0.24226	1.52262	0.882437
6	F	12	YDL134C	0.675728	1.0847	0.880215
1	F	8	YPL231W	1.00726	0.7486	0.877927
12	I	11	YKL065C	0.99372	0.761953	0.877836
5	O	19	YHL048W	1.20452	0.549042	0.876781
2	B	20	YNL068C	1.56835	0.184795	0.876574
1	E	7	YOR363C	0.854145	0.898335	0.87624
6	L	10	YDR191W	0.921905	0.829895	0.8759
1	C	7	YHR073W	0.782613	0.965463	0.874038
11	F	5	YPL134C	1.32987	0.417975	0.873923
2	O	19	YIL108W	1.1542	0.591465	0.872832
10	L	1	YJL198W	0.993935	0.745765	0.86985
3	G	2	YGR013W	0.789575	0.94882	0.869198
5	A	5	YPL112C	0.818573	0.919445	0.869009
6	A	9	YIR011C	0.555065	1.18149	0.86828
6	A	7	YPL206C	0.463015	1.26864	0.865827
3	L	5	YPL210C	0.66685	1.0574	0.862125
6	K	21	YHR199C	1.3666	0.353785	0.860191
9	K	3	YPR052C	1.19646	0.52388	0.860171
11	B	15	YIL114C	1.08725	0.630012	0.858629
9	C	24	YNL146W	0.540765	1.17544	0.8581
7	G	4	YLR064W	0.94181	0.765485	0.853648
5	M	8	YOR042W	0.42958	1.2752	0.852388
9	A	4	YDR357C	0.252877	1.44702	0.84995
4	I	4	YPL072W	0.932787	0.76052	0.846654
3	O	13	YCR065W	0.882243	0.809955	0.846099
10	C	2	YBL042C	1.62859	0.0618225	0.845208
1	C	19	YML076C	1.1462	0.543582	0.84489
11	I	7	YEL017C-A	1.01903	0.662698	0.840866
11	N	8	YOL044W	0.961765	0.716557	0.839161
1	M	14	YPR042C	0.967052	0.708287	0.83767
11	I	15	YDR247W	0.44121	1.23325	0.837229
1	G	9	YMR275C	0.632923	1.03953	0.836228
8	H	7	YLR363C	1.24064	0.43024	0.835439
4	P	3	YLR392C	0.147177	1.52368	0.835429
2	N	20	YAR044W	0.868583	0.80083	0.834706
6	D	6	YDL193W	0.926137	0.74103	0.833584
6	C	18	YPL055C	0.49363	1.17017	0.8319
11	E	11	YNL217W	1.33236	0.330118	0.83124
6	J	19	YBL033C	0.40345	1.25493	0.82919
4	C	14	YJL081C	1.1967	0.45869	0.827695
1	E	24	YGL207W	0.593065	1.05757	0.825317
6	C	10	YPR056W	1.55463	0.092965	0.8238
9	E	24	YNL198C	0.134985	1.51052	0.822752
8	J	3	YPR174C	1.45167	0.18911	0.820391
6	H	6	YGR286C	1.06713	0.572558	0.819846
5	N	5	YOL124C	0.700395	0.937867	0.819131
4	C	13	YDR219C	1.75893	-0.12298	0.817975
2	H	1	YNL298W	0.422368	1.213	0.817684
5	H	15	YBR130C	1.01478	0.613225	0.814001
3	B	13	YDR390C	1.21804	0.407185	0.812614
8	F	3	YMR077C	1.05146	0.573142	0.812302
6	D	23	YPL118W	0.375487	1.24564	0.810566
1	B	21	YJR041C	1.45287	0.167862	0.810364
9	M	14	YGR027C	0.73123	0.88682	0.809025
2	G	23	YFL013C	0.55444	1.06024	0.807338
1	I	4	YIL151C	1.04512	0.568078	0.8066
10	C	6	YGR138C	1.20644	0.403857	0.805148
3	M	8	YJR046W	0.748777	0.857518	0.803148
3	J	13	YEL060C	0.77171	0.831505	0.801608
6	L	18	YLR063W	0.68427	0.91604	0.800155
9	P	4	YJR055W	0.18837	1.40993	0.799148
7	H	22	YER117W	0.5091	1.08333	0.796218
11	A	6	YOR185C	1.34816	0.241145	0.794654
6	G	1	YMR143W	0.70068	0.887338	0.794009
3	D	7	YGL124C	0.678917	0.905705	0.792311
12	K	14	YHR147C	0.1188	1.46383	0.791316
12	N	18	YLR163C	-0.154532	1.73318	0.789324
12	O	17	YDR395W	0.195077	1.38235	0.788715
3	D	22	YLR299W	-0.154697	1.72709	0.786196
4	C	2	YDR330W	0.708585	0.86095	0.784768
6	O	1	YGR007W	0.456945	1.11108	0.784014
3	L	19	YHR166C	0.91758	0.65023	0.783905
5	C	24	YOL136C	0.25885	1.30622	0.782535
9	D	11	YNR022C	0.928042	0.633775	0.780909
4	I	5	YLR212C	1.53479	0.0205	0.777646
1	F	6	YCR093W	1.16943	0.384	0.776715
11	F	22	YMR060C	1.25215	0.29987	0.776012
1	M	4	YBL101C	0.903308	0.647482	0.775395
1	C	5	YKL173W	0.768312	0.780012	0.774162
2	M	2	YGR250C	0.56045	0.987755	0.774103
3	J	1	YDR118W	0.7836	0.763825	0.773713
3	N	19	YDR425W	0.65144	0.892295	0.771867
8	F	6	YBR242W	0.887197	0.655212	0.771205
9	P	2	YGL087C	0.975745	0.566215	0.77098
11	H	3	YOR069W	0.440935	1.1001	0.770515
11	C	12	YOR016C	0.806268	0.726025	0.766146
11	A	3	YGR020C	1.29922	0.23285	0.766034
1	N	19	YLR272C	0.660935	0.870555	0.765745
9	I	21	YOL081W	0.520855	1.00974	0.765296
11	D	1	YGL212W	0.87475	0.652593	0.763671
9	L	17	YKL003C	1.48426	0.0419975	0.763126
10	A	13	YBR003W	2.25315	-0.727465	0.762844
1	P	7	YMR076C	0.542925	0.979505	0.761215
8	G	4	YDL002C	0.852575	0.66566	0.759118
10	E	1	YDR072C	1.48477	0.031315	0.758042
2	F	7	YJL157C	0.993868	0.521845	0.757856
6	A	5	YNL284C	0.796125	0.71895	0.757537
1	K	5	YAL035W	1.19364	0.317422	0.755531
11	E	20	YPR149W	1.2939	0.215757	0.754827
10	J	14	YOR098C	1.90417	-0.39771	0.753229
3	E	23	YOR372C	0.0136575	1.48695	0.750304
8	O	14	YBL107C	0.908628	0.591668	0.750147
12	P	22	YIL026C	0.910987	0.588095	0.749541
11	K	6	YNR061C	0.834085	0.661783	0.747934
10	I	6	YDR244W	0.367275	1.12125	0.744265
2	A	8	YLL054C	0.304743	1.1836	0.744171
6	G	9	YML025C	0.9021	0.584993	0.743546
10	K	17	YDR483W	1.28643	0.20054	0.743484
11	O	6	YJL097W	0.570495	0.914948	0.742721
6	B	6	YOR193W	0.596085	0.88569	0.740887
1	P	6	YLR422W	0.335385	1.14204	0.738712
12	P	15	YBL023C	0.560447	0.91429	0.737369
6	N	16	YBR221C	0.774495	0.69734	0.735918
5	K	21	YBR026C	1.05497	0.407307	0.731137
1	K	16	YKR086W	0.69911	0.762082	0.730596
7	P	3	YLR132C	0.598775	0.86209	0.730433
3	P	15	YCR061W	0.350535	1.10984	0.73019
8	B	23	YLR287C-A	1.1996	0.256447	0.728025
11	O	19	YMR288W	0.954745	0.499613	0.727179
8	N	14	YDR043C	0.95881	0.487142	0.722976
3	J	9	YIL046W	3.07721	-1.63209	0.722558
9	P	6	YBR244W	0.43898	1.00584	0.722407
5	L	6	YHR066W	0.664925	0.77807	0.721498
1	D	1	YBR115C	0.18599	1.25327	0.719632
6	A	3	YHR010W	1.85106	-0.41314	0.71896
6	M	19	YOR164C	0.89322	0.542283	0.717751
4	H	11	YJR010W	0.73001	0.701595	0.715803
11	B	5	YGR284C	1.14698	0.282763	0.714871
1	K	6	YNL163C	0.76637	0.660417	0.713394
1	I	3	YIL125W	1.3265	0.0997925	0.713147
8	K	2	YKR035W-A	0.92197	0.499085	0.710527
12	P	6	YOL117W	0.944508	0.47568	0.710094
7	K	11	YLR435W	-0.041035	1.45931	0.709136
11	B	1	YDR492W	1.03608	0.375547	0.705814
9	H	11	YIL040W	0.8539	0.557655	0.705777
6	I	3	YCR002C	0.54959	0.858648	0.704119
2	O	4	YOR165W	0.60576	0.800065	0.702913
8	G	1	YOR163W	1.01919	0.38544	0.702315
5	B	13	YOR274W	1.09776	0.3058	0.70178
9	P	13	YNR046W	1.10838	0.293085	0.700732
2	I	22	YMR078C	0.94679	0.454163	0.700476
11	C	2	YKR014C	0.785377	0.611965	0.698671
12	K	24	YJR088C	0.716695	0.678318	0.697506
3	M	20	YGR068C	0.734067	0.656922	0.695495
1	L	21	YLR035C-A	0.422972	0.96727	0.695121
10	O	14	YDR343C	0.615055	0.774748	0.694901
4	K	7	YOR198C	0.507255	0.880295	0.693775
2	P	21	YDR034C	0.9226	0.464027	0.693314
3	B	11	YDR266C	0.874393	0.511605	0.692999
8	J	19	YML095C	0.442773	0.9432	0.692986
11	O	20	YMR292W	0.376225	1.0007	0.688464
9	I	13	YHR143W-A	0.69552	0.679517	0.687519
8	H	3	YNL036W	1.00938	0.36561	0.687496
2	P	18	YMR165C	0.25161	1.11757	0.684589
11	L	16	YDR297W	0.837325	0.527585	0.682455
9	E	12	YHR087W	1.10688	0.25377	0.680323
10	K	21	YOR212W	0.882347	0.47365	0.677999
10	G	1	YER123W	0.919135	0.433185	0.67616
3	M	18	YER068W	0.496702	0.855287	0.675995
12	I	15	YOR085W	0.815165	0.532648	0.673906
8	B	14	YDR020C	0.719893	0.623907	0.6719
7	I	7	YLR126C	1.09135	0.250385	0.670869
2	D	3	YKL022C	1.27517	0.06528	0.670223
6	L	14	YPL090C	0.52727	0.8117	0.669485
6	D	13	YNL264C	0.615112	0.71979	0.667451
5	I	9	YDR197W	0.771315	0.562265	0.66679
2	A	23	YLR072W	0.797307	0.53471	0.666009
2	H	20	YPL008W	0.369652	0.962015	0.665834
3	J	18	YLL007C	0.457715	0.87297	0.665342
9	E	18	YBR268W	1.61085	-0.281285	0.664782
2	B	4	YLL026W	1.04318	0.2854	0.664291
3	B	1	YDR389W	0.507652	0.819995	0.663824
3	N	14	YLR427W	0.54475	0.78138	0.663065
1	M	8	YML100W	0.608908	0.709762	0.659335
1	M	18	YJL098W	0.796643	0.516552	0.656597
2	E	1	YOR001W	0.838618	0.470055	0.654336
7	I	13	YPL107W	0.493183	0.81254	0.652861
10	L	13	YJR042W	0.183945	1.11855	0.651247
3	H	16	YDR320C	0.809465	0.491295	0.65038
6	E	9	YLR457C	1.52471	-0.226545	0.649084
4	P	11	YFR039C	0.585333	0.710095	0.647714
11	F	21	YGL098W	0.84424	0.449485	0.646863
3	G	24	YKL012W	0.80181	0.490205	0.646008
10	P	23	YNR019W	0.72346	0.558922	0.641191
5	L	15	YIL103W	0.451795	0.823375	0.637585
1	G	17	YIL137C	0.716213	0.558708	0.63746
4	N	9	YMR093W	2.70345	-1.42903	0.637209
1	F	7	YLR398C	0.79312	0.479725	0.636423
6	F	3	YBR084C-A	0.332412	0.939013	0.635713
1	H	24	YLR086W	0.660928	0.609475	0.635201
5	F	8	YBR166C	0.421155	0.847115	0.634135
7	J	6	YOR238W	0.998695	0.267078	0.632886
11	A	8	YLR350W	0.659817	0.6052	0.632509
2	B	6	YPL150W	0.612017	0.65166	0.631839
3	G	20	YOR154W	0.832025	0.43157	0.631798
2	J	2	YER151C	0.17113	1.0919	0.631513
11	P	24	YPL087W	0.968052	0.285845	0.626949
9	K	20	YNL030W	1.09739	0.15298	0.625186
8	C	12	YJL217W	0.71997	0.530188	0.625079
7	J	1	YDR450W	0.87148	0.378632	0.625056
1	G	11	YNL118C	1.02292	0.220858	0.62189
4	H	8	YPL212C	0.707075	0.53646	0.621768
2	P	7	YLR263W	0.260575	0.982263	0.621419
10	D	20	YDR238C	0.977815	0.262875	0.620345
7	K	7	YOR289W	0.69802	0.540077	0.619049
11	E	14	YNL044W	0.772097	0.465243	0.61867
4	A	1	YGR255C	0.36525	0.871695	0.618472
11	D	18	YLR372W	0.790645	0.443368	0.617006
1	B	15	YDR335W	0.62754	0.604927	0.616234
4	J	7	YKL103C	1.13352	0.098895	0.61621
5	D	1	YBR273C	0.27836	0.948915	0.613637
2	M	13	YPL155C	0.756	0.46924	0.61262
5	P	9	YNL004W	0.03904	1.18546	0.612252
2	A	10	YOR140W	1.2046	0.01756	0.611079
9	A	6	YDL152W	0.374397	0.847012	0.610705
2	G	22	YMR216C	0.263125	0.957645	0.610385
10	B	1	YIL047C	1.05065	0.16668	0.608662
4	A	11	YBR093C	0.223975	0.988165	0.60607
9	A	5	YOL159C-A	0.426017	0.785502	0.60576
10	H	10	YAL002W	0.702345	0.509085	0.605715
11	I	6	YDR246W	0.704665	0.501923	0.603294
12	H	7	YOR117W	0.59667	0.605228	0.600949
8	B	15	YBR005W	0.583137	0.617413	0.600275
1	F	22	YDL112W	0.736925	0.46355	0.600237
1	I	12	YIL112W	0.602718	0.594662	0.59869
8	F	8	YPL213W	0.992128	0.203258	0.597693
6	O	12	YPR110C	0.534575	0.660353	0.597464
6	N	11	YDR279W	0.17529	1.01853	0.596912
8	I	22	YDR253C	0.52425	0.66868	0.596465
11	M	15	YBR248C	0.813248	0.37835	0.595799
3	J	3	YDL224C	0.260925	0.92736	0.594143
1	O	18	YLR039C	0.6494	0.538105	0.593753
5	I	21	YPR140W	-0.812975	1.99959	0.593307
9	I	1	YDR322C-A	0.56148	0.623557	0.592519
12	N	17	YLR163C	-0.366853	1.55096	0.592054
11	C	6	YPR113W	0.666758	0.51714	0.591949
1	G	10	YOL034W	-0.0088175	1.19087	0.591025
1	D	21	YFR031C	0.5617	0.615055	0.588377
4	I	10	YDR182W	0.644497	0.53222	0.588359
6	M	18	YNL301C	0.5014	0.674832	0.588116
8	D	7	YGL079W	0.565773	0.610252	0.588013
4	N	17	YPL140C	0.829632	0.34631	0.587971
10	P	18	YOL084W	0.66171	0.509907	0.585809
9	M	3	YKL096W-A	0.35273	0.81801	0.58537
7	O	8	YKL007W	0.09904	1.07064	0.584838
11	A	4	YEL001C	1.11368	0.055395	0.584536
6	D	14	YMR114C	0.515877	0.65211	0.583994
10	A	11	YPL175W	1.41639	-0.24993	0.583231
5	E	21	YPL014W	0.266402	0.899212	0.582807
8	P	6	YJL121C	0.27848	0.886722	0.582601
3	N	13	YDR477W	0.24255	0.92061	0.58158
7	K	12	YCR009C	1.04763	0.106648	0.577136
4	D	6	YOR241W	0.981315	0.169043	0.575179
1	A	5	YDR379W	0.20984	0.938542	0.574191
8	O	15	YGL222C	0.613202	0.528852	0.571028
11	N	13	YNL055C	0.75129	0.390138	0.570714
12	J	22	YDR189W	0.891175	0.249025	0.5701
1	E	8	YMR218C	0.48752	0.64849	0.568005
10	N	9	YDR119W	0.372312	0.763695	0.568004
5	M	3	YIL042C	0.374325	0.76167	0.567997
1	L	24	YJR031C	0.396852	0.738265	0.567559
3	A	5	YGR171C	0.39182	0.743175	0.567497
6	D	7	YNL229C	1.02115	0.11364	0.567394
11	G	12	YJR073C	1.05052	0.0810225	0.565769
5	D	18	YJL060W	0.52793	0.599885	0.563908
3	B	5	YDR014W	0.154773	0.97095	0.562861
4	K	22	YGL097W	0.429755	0.69558	0.562667
8	I	6	YJR112W	1.28569	-0.16163	0.56203
4	N	15	YIL104C	0.786377	0.33345	0.559914
6	P	17	YIL019W	-0.291888	1.41042	0.559266
1	O	19	YGR089W	0.384495	0.73167	0.558083
1	L	4	YPL085W	0.424907	0.688055	0.556481
9	G	7	YPR182W	0.779735	0.330295	0.555015
6	M	11	YMR310C	0.135925	0.972627	0.554276
2	C	10	YKR027W	0.11483	0.991945	0.553388
7	A	18	YGR207C	0.783258	0.32248	0.552869
5	J	1	YLR203C	0.8689	0.235705	0.552303
12	K	1	YDL045W-A	0.04386	1.06028	0.552069
8	J	1	YDR140W	0.565152	0.538145	0.551649
12	N	9	YMR305C	0.618578	0.481605	0.550091
7	I	14	YDR471W	0.249328	0.84975	0.549539
9	H	8	YOR357C	0.70897	0.38819	0.54858
4	E	9	YJL146W	0.89426	0.20222	0.54824
6	D	3	YPL152W	0.410322	0.68542	0.547871
12	M	23	YMR029C	1.04859	0.0460925	0.54734
2	L	14	YNL325C	0.535485	0.557697	0.546591
2	F	1	YJL047C	0.316808	0.77501	0.545909
9	L	4	YPL135W	0.454755	0.634807	0.544781
5	P	8	YPL049C	0.40133	0.687905	0.544617
3	L	10	YNL027W	0.237935	0.850125	0.54403
2	G	19	YBR156C	0.9502	0.131535	0.540868
7	G	15	YLL038C	0.298165	0.7834	0.540782
5	A	7	YIL153W	0.738337	0.34214	0.540239
1	I	13	YHR120W	0.663138	0.417258	0.540197
1	P	16	YHR164C	0.886755	0.189675	0.538215
6	G	21	YDR090C	0.602825	0.473118	0.537971
9	M	5	YDL130W-A	0.76252	0.31341	0.537965
1	H	5	YDR216W	0.701287	0.37358	0.537434
10	F	2	YDR093W	0.52236	0.55089	0.536625
5	J	7	YDL090C	0.78736	0.285725	0.536542
3	E	11	YGR241C	0.817778	0.25464	0.536209
11	E	13	YDL099W	1.02868	0.0433075	0.535992
10	G	15	YBL045C	0.313815	0.75811	0.535963
9	N	19	YLR297W	0.763675	0.30615	0.534913
6	H	5	YDR173C	0.611415	0.456998	0.534206
8	B	8	YLR390W-A	0.749432	0.318717	0.534075
5	F	23	YOR245C	0.232275	0.834795	0.533535
1	J	12	YMR219W	0.68785	0.377233	0.532541
8	P	12	YBR261C	0.33266	0.732258	0.532459
5	F	20	YER061C	0.72819	0.33611	0.53215
11	J	24	YDR033W	0.141605	0.920375	0.53099
2	A	5	YNR044W	0.423708	0.63727	0.530489
7	E	16	YDR486C	0.88425	0.176695	0.530473
12	J	16	YOR085W	0.65843	0.39916	0.528795
9	J	9	YDR437W	0.542432	0.514643	0.528537
11	K	2	YHR181W	0.384455	0.672148	0.528301
4	A	18	YNL277W	0.705215	0.35004	0.527628
12	N	4	YPR057W	0.491107	0.563735	0.527421
11	J	14	YBR105C	0.556995	0.49615	0.526572
7	G	13	YOR213C	0.35574	0.69596	0.52585
12	N	23	YMR029C	0.657177	0.39303	0.525104
1	B	19	YOR086C	1.43531	-0.386228	0.524541
6	B	3	YJR147W	0.30497	0.74391	0.52444
11	M	2	YJL158C	1.0537	-0.00761	0.523046
1	A	3	YDL240W	0.574545	0.470722	0.522634
8	D	13	YBL057C	0.761552	0.281847	0.5217
3	E	13	YOR023C	0.505487	0.53757	0.521529
1	E	1	YBL037W	0.430155	0.611795	0.520975
8	I	24	YGL231C	0.825695	0.21566	0.520678
4	O	6	YGR091W	0.372685	0.665643	0.519164
1	H	6	YKL182W	0.517367	0.518695	0.518031
2	N	11	YLR337C	0.761733	0.274075	0.517904
6	K	19	YOR120W	0.144923	0.889805	0.517364
7	J	15	YOR104W	0.311365	0.722988	0.517176
3	C	1	YBR170C	0.27343	0.76065	0.51704
9	M	20	YOL150C	0.44785	0.58616	0.517005
2	H	3	YKR079C	0.585407	0.447705	0.516556
4	D	4	YMR171C	0.37807	0.654593	0.516331
6	P	6	YNR075W	0.375323	0.65627	0.515796
7	N	13	YKR046C	0.555525	0.47275	0.514138
11	E	3	YPR020W	0.625382	0.402218	0.5138
5	C	2	YIL160C	0.11217	0.912975	0.512572
2	D	5	YIL038C	0.3784	0.645935	0.512167
1	C	15	YEL043W	0.282357	0.739128	0.510742
6	C	9	YLR439W	0.59559	0.425875	0.510733
6	G	23	YOR312C	0.94318	0.0777125	0.510446
2	M	11	YPL240C	0.84377	0.17665	0.51021
8	O	17	YDL219W	0.519382	0.500703	0.510042
10	C	1	YDL088C	1.01502	0.0043175	0.50967
9	O	2	YGL226W	0.92652	0.09194	0.50923
10	P	22	YHR098C	1.08977	-0.0713175	0.509224
7	C	11	YLR052W	0.743733	0.27389	0.508811
1	G	7	YIR002C	0.745408	0.271083	0.508245
9	N	2	YLR074C	0.562525	0.453445	0.507985
4	P	9	YMR283C	0.522068	0.49207	0.507069
1	N	3	YFL036W	1.72567	-0.711955	0.506855
1	O	1	YGR188C	0.07882	0.93463	0.506725
5	G	11	YGR072W	0.621435	0.38898	0.505208
12	M	24	YMR029C	0.250698	0.759702	0.5052
11	L	17	YOL009C	0.86064	0.149305	0.504972
10	O	24	YLL055W	0.697465	0.312248	0.504856
7	F	10	YBR231C	-0.34724	1.35643	0.504596
5	M	11	YLR244C	0.577055	0.43056	0.503807
11	M	13	YER021W	0.986633	0.02013	0.503381
5	N	11	YDR300C	0.334155	0.671922	0.503039
8	G	7	YCR090C	0.520015	0.485905	0.50296
8	P	10	YLR250W	0.443915	0.558837	0.501376
10	N	22	YPL195W	1.24192	-0.239545	0.501189
2	C	6	YBR142W	0.715045	0.286465	0.500755
12	N	24	YMR029C	0.545227	0.45566	0.500444
9	M	13	YOR210W	0.51128	0.48866	0.49997
2	E	5	YGL245W	0.552623	0.444735	0.498679
7	E	23	YOR305W	0.32885	0.66831	0.49858
7	P	21	YNL162W	1.34388	-0.34827	0.497807
3	B	10	YHL029C	0.247567	0.746425	0.496996
12	O	16	YBL023C	0.103123	0.888088	0.495605
3	I	12	YKL032C	0.36871	0.622215	0.495462
2	K	23	YMR224C	0.35696	0.63324	0.4951
1	K	12	YPR115W	0.33638	0.653462	0.494921
7	K	13	YCR004C	0.03885	0.949952	0.494401
2	L	12	YJL078C	-0.04101	1.02704	0.493014
7	F	4	YGR104C	0.539015	0.443192	0.491104
5	P	4	YPL245W	0.353455	0.62794	0.490698
6	P	8	YLR048W	0.545458	0.434485	0.489971
4	K	13	YHR146W	0.602045	0.37775	0.489897
7	E	10	YEL019C	0.38811	0.590135	0.489123
2	I	18	YGL086W	0.387485	0.589052	0.488269
6	E	23	YOR279C	-0.0365475	1.01306	0.488254
10	H	17	YGL145W	0.714855	0.26136	0.488108
4	L	1	YKL081W	0.52535	0.44988	0.487615
6	A	11	YNL315C	0.33969	0.633125	0.486407
1	H	9	YOR124C	0.377943	0.59308	0.485511
5	K	9	YGR112W	0.495457	0.475293	0.485375
11	P	18	YGL225W	0.399877	0.569895	0.484886
10	O	22	YER014W	0.874565	0.0947875	0.484676
9	F	8	YOL071W	0.506095	0.460018	0.483056
7	B	11	YDR116C	0.86341	0.102015	0.482712
12	H	5	YMR024W	0.745085	0.220032	0.482559
2	M	19	YPL116W	0.3657	0.59865	0.482175
1	K	14	YER033C	0.76635	0.197912	0.482131
7	B	12	YOR228C	0.70816	0.256075	0.482117
9	M	12	YDR382W	1.14881	-0.18541	0.481698
4	A	15	YPR178W	0.3913	0.5705	0.4809
10	D	3	YLR166C	0.77938	0.182075	0.480727
8	E	18	YPR037C	0.568072	0.39158	0.479826
2	F	23	YOR035C	0.333753	0.62588	0.479816
12	H	6	YMR024W	0.67596	0.282427	0.479194
8	J	6	YDL059C	0.955568	0.00251	0.479039
10	O	20	YNL154C	1.04154	-0.0862325	0.477654
1	E	3	YLL031C	0.73804	0.216815	0.477428
4	D	12	YLR020C	0.43772	0.516232	0.476976
9	B	1	YBR252W	0.26495	0.688235	0.476593
4	M	11	YBL086C	0.851735	0.10058	0.476158
12	L	24	YJR088C	0.649338	0.301293	0.475315
3	K	1	YPR083W	0.523523	0.424815	0.474169
10	H	23	YHR039C	0.409365	0.53803	0.473697
7	O	14	YGR161C	0.31195	0.63199	0.47197
7	B	8	YGR277C	0.83843	0.103905	0.471168
3	F	17	YML046W	0.80306	0.13859	0.470825
4	K	4	YBR006W	0.330915	0.61036	0.470638
6	F	4	YGL155W	0.511528	0.427702	0.469615
7	J	5	YFL028C	0.87617	0.0618325	0.469001
6	M	15	YLR283W	0.12942	0.807593	0.468506
4	P	15	YML043C	0.962477	-0.02607	0.468204
9	N	22	YBR173C	0.397885	0.53795	0.467917
1	D	7	YOR296W	0.39892	0.536075	0.467498
4	O	18	YHR030C	0.85857	0.0762225	0.467396
11	H	21	YML064C	0.55592	0.377055	0.466487
10	O	13	YBR207W	0.608505	0.323887	0.466196
4	L	22	YBR138C	0.419415	0.512465	0.46594
4	J	22	YOR377W	0.532065	0.39949	0.465778
7	L	7	YGL057C	0.713275	0.218135	0.465705
6	J	14	YPR065W	-0.38954	1.32053	0.465495
1	O	23	YGL093W	0.322745	0.606235	0.46449
9	P	3	YIL051C	-0.01119	0.937815	0.463312
9	C	10	YNL135C	0.641485	0.279385	0.460435
7	G	11	YPR143W	0.630215	0.287225	0.45872
8	K	5	YKR007W	0.85218	0.0632	0.45769
3	A	8	YMR168C	0.59631	0.317395	0.456852
3	N	15	YKL204W	0.05455	0.85865	0.4566
1	F	10	YER132C	0.654655	0.25645	0.455553
10	F	12	YBL022C	1.36429	-0.45424	0.455025
3	B	23	YDL203C	0.294482	0.614065	0.454274
9	J	1	YNL147W	0.714442	0.193633	0.454037
1	F	24	YMR259C	0.52811	0.37962	0.453865
9	H	7	YMR269W	0.59516	0.311645	0.453403
3	D	5	YIL101C	0.416998	0.489255	0.453126
12	K	20	YLR323C	0.855655	0.0500175	0.452836
7	L	5	YOL080C	0.572175	0.330715	0.451445
9	C	23	YLR342W	0.332495	0.569415	0.450955
7	H	4	YHL013C	0.82667	0.06878	0.447725
2	L	16	YDR089W	0.896155	-0.0015125	0.447321
1	A	18	YGR274C	1.26591	-0.374323	0.445794
9	H	10	YPR073C	0.767865	0.12293	0.445398
4	H	16	YJR049C	0.958795	-0.069015	0.44489
3	H	22	YER173W	0.492165	0.396935	0.44455
5	F	16	YBR279W	0.72338	0.16546	0.44442
6	K	3	YGL115W	-0.0687025	0.955635	0.443466
7	E	12	YIL070C	0.39806	0.486095	0.442078
11	B	8	YPL255W	0.551375	0.331803	0.441589
9	B	21	YNL153C	0.585985	0.295275	0.44063
5	I	24	YJL048C	0.452945	0.42754	0.440242
4	N	2	YJL110C	0.153867	0.72485	0.439359
11	M	19	YBR215W	0.559523	0.3183	0.438911
8	G	8	YBL072C	0.431045	0.44651	0.438778
2	F	13	YLR228C	0.427453	0.44857	0.438011
9	D	19	YGL080W	2.13208	-1.25615	0.437966
10	P	15	YLL051C	0.790495	0.0852425	0.437869
1	A	20	YNL132W	0.59182	0.283278	0.437549
8	N	2	YJL136C	0.48777	0.386628	0.437199
8	N	13	YNL213C	0.45425	0.419662	0.436956
5	K	4	YOL082W	0.562242	0.309267	0.435755
5	F	10	YML097C	0.303035	0.56835	0.435693
2	D	6	YBR225W	0.177945	0.691825	0.434885
4	B	9	YGR123C	1.69051	-0.820928	0.434794
10	A	6	YNL121C	1.30465	-0.43509	0.434779
5	L	17	YJL036W	0.583625	0.284695	0.43416
9	L	3	YBL025W	0.563455	0.303847	0.433651
2	C	24	YPR090W	0.576995	0.2903	0.433648
9	P	1	YDL092W	0.83421	0.031745	0.432978
12	I	22	YDR189W	0.741775	0.123813	0.432794
5	H	17	YBL058W	0.0549475	0.810295	0.432621
8	E	9	YAL055W	0.668497	0.1956	0.432049
1	C	20	YMR261C	0.239943	0.623038	0.43149
4	G	18	YML085C	0.748003	0.114467	0.431235
9	C	8	YDL157C	0.31115	0.549495	0.430322
6	B	8	YFR024C	0.67811	0.182405	0.430258
10	O	17	YMR243C	0.79893	0.0614475	0.430189
7	G	14	YOR220W	0.548115	0.31201	0.430063
8	E	14	YIL157C	0.551007	0.30748	0.429244
10	E	5	YAL058W	0.61164	0.24648	0.42906
2	C	2	YOR172W	0.71449	0.14287	0.42868
5	E	6	YOR196C	1.24645	-0.390367	0.428042
4	E	2	YDR516C	0.12223	0.73264	0.427435
5	F	19	YBR195C	-0.306405	1.15986	0.42673
5	P	11	YDR394W	0.296155	0.55715	0.426652
11	N	18	YDR265W	0.493455	0.358928	0.426191
7	P	18	YDR233C	0.47243	0.379665	0.426048
1	N	23	YER129W	-0.086135	0.93806	0.425962
1	D	6	YMR207C	0.52529	0.32515	0.42522
3	H	20	YOR350C	0.7234	0.126645	0.425023
11	H	5	YGR060W	0.54771	0.301265	0.424488
6	C	24	YIL041W	-0.213315	1.06206	0.424372
11	L	13	YDR472W	0.21658	0.630975	0.423777
3	F	21	YEL062W	0.28327	0.56338	0.423325
5	D	3	YML051W	0.093115	0.752865	0.42299
1	I	9	YBR084W	0.502302	0.341512	0.421907
8	A	16	YBR122C	0.691178	0.15238	0.421779
7	F	12	YPL064C	0.28383	0.559183	0.421506
1	O	22	YCL024W	0.265605	0.574915	0.42026
9	I	2	YDR493W	0.414055	0.425577	0.419816
6	F	14	YNL316C	1.13356	-0.294017	0.41977
4	G	2	YFR021W	0.557187	0.281127	0.419157
11	E	1	YGL226C-A	0.450587	0.387213	0.4189
1	H	11	YBL007C	0.719202	0.117885	0.418544
11	J	11	YKR055W	0.44442	0.392435	0.418427
4	M	1	YDL103C	0.74356	0.09272	0.41814
8	A	18	YJL178C	0.228123	0.60714	0.417631
5	C	1	YJL138C	0.21262	0.62229	0.417455
2	G	4	YLR144C	0.61457	0.219425	0.416997
4	N	5	YDL159W	0.383727	0.44751	0.415619
7	O	10	YDL043C	0.17991	0.650115	0.415013
11	K	9	YJR006W	0.37211	0.456898	0.414504
8	P	15	YNR014W	0.786405	0.0384225	0.412414
2	O	13	YBL035C	0.9261	-0.102605	0.411748
12	P	5	YOL117W	0.543693	0.278635	0.411164
12	I	12	YKL065C	0.67288	0.148902	0.410891
3	A	13	YLR417W	0.66142	0.15916	0.41029
11	B	2	YBR036C	0.4389	0.380142	0.409521
8	J	4	YPL199C	1.02104	-0.202755	0.409141
5	N	6	YKL108W	0.25917	0.557562	0.408366
8	B	21	YDR487C	0.0586525	0.755437	0.407045
7	A	7	YJL066C	0.200972	0.61181	0.406391
9	A	16	YLL014W	0.753988	0.0577975	0.405892
8	K	16	YER029C	0.24942	0.56197	0.405695
2	D	20	YLR347C	0.81919	-0.00862	0.405285
6	C	4	YGR283C	0.28916	0.52036	0.40476
6	B	5	YPR040W	0.320415	0.48865	0.404532
3	A	11	YLR253W	0.56128	0.24758	0.40443
1	N	21	YBL105C	0.18127	0.627185	0.404227
1	J	17	YKR096W	0.816465	-0.0090725	0.403696
8	M	1	YER112W	0.156397	0.650783	0.40359
10	A	5	YKL175W	0.345662	0.461385	0.403524
5	G	24	YGL181W	0.20516	0.60182	0.40349
2	G	15	YMR163C	0.489765	0.3164	0.403083
9	N	5	YDR513W	0.01037	0.795395	0.402882
5	G	15	YLL022C	0	0.804515	0.402257
7	K	3	YFL006W	0.93679	-0.132587	0.402101
3	A	20	YIL036W	0.75612	0.04738	0.40175
3	A	12	YGL125W	0.82023	-0.01753	0.40135
6	H	24	YKR066C	0.29199	0.509977	0.400984
11	P	15	YIR014W	0.330888	0.470995	0.400941
4	P	12	YML115C	0.471633	0.32852	0.400076
4	B	17	YDL160C	0.94037	-0.140657	0.399856
8	J	5	YKL142W	0.595418	0.203315	0.399366
9	N	4	YIL057C	0.01649	0.781795	0.399143
10	P	20	YKL068W	0.73929	0.0584625	0.398876
5	C	6	YMR253C	0.61164	0.18591	0.398775
1	A	14	YOL100W	0.5102	0.285322	0.397761
6	A	15	YGR231C	0.113775	0.67973	0.396752
7	O	1	YMR157C	0.451705	0.341455	0.39658
4	B	5	YMR064W	0.486605	0.305762	0.396184
11	H	11	YHR133C	0.637115	0.154755	0.395935
9	B	23	YGL127C	0.946605	-0.156075	0.395265
1	N	13	YCR033W	0.85931	-0.07239	0.39346
7	M	2	YLR412W	0.462035	0.324003	0.393019
5	J	21	YER149C	0.94624	-0.160555	0.392842
9	J	20	YLR218C	0.351892	0.432372	0.392132
10	N	24	YLR309C	1.03006	-0.246995	0.391534
9	B	2	YKL056C	1.28287	-0.500115	0.39138
12	I	16	YOR085W	0.53912	0.242877	0.390999
3	J	5	YGL107C	0.34655	0.43508	0.390815
6	K	24	YDR530C	0.805107	-0.023485	0.390811
9	J	2	YBR230C	0.890188	-0.109348	0.39042
2	I	17	YDR221W	0.519565	0.258653	0.389109
11	P	11	YDR284C	0.788737	-0.012265	0.388236
4	D	10	YBL080C	0.32557	0.449763	0.387666
11	M	9	YGL119W	0.438047	0.33652	0.387284
12	K	23	YJR088C	0.258565	0.515558	0.387061
7	A	11	YLR022C	0.430227	0.34256	0.386394
8	L	20	YPR043W	0.677295	0.09316	0.385228
3	I	15	YGR087C	0.40195	0.367125	0.384537
9	L	2	YEL044W	0.2624	0.504018	0.383209
7	G	19	YOL028C	0.054355	0.71103	0.382693
12	M	3	YPR057W	0.426333	0.338703	0.382518
9	M	1	YBL029C-A	0.76412	0	0.38206
8	C	17	YLR193C	0.550945	0.211693	0.381319
4	N	1	YBL019W	0.847368	-0.084885	0.381241
5	N	4	YOR375C	0.491715	0.267892	0.379804
7	I	5	YER056C-A	0.983932	-0.224665	0.379634
2	K	12	YOR337W	0.175925	0.58168	0.378802
10	D	7	YPL270W	0.53573	0.220665	0.378198
6	G	22	YNL302C	0.59994	0.155867	0.377904
11	F	1	YGR062C	0.54427	0.20827	0.37627
7	O	12	YDR152W	0.46035	0.291815	0.376082
10	L	10	YPL006W	0.82123	-0.069215	0.376008
1	K	20	YCR092C	0.31187	0.439578	0.375724
10	N	12	YDR038C	-0.0475075	0.798935	0.375714
2	B	5	YDR207C	0.356413	0.39471	0.375561
5	C	5	YBL013W	1.19372	-0.443295	0.375215
11	F	18	YLR447C	0.597425	0.152715	0.37507
8	N	22	YDR007W	1.0213	-0.272253	0.374524
8	B	17	YOL111C	0.463797	0.285212	0.374505
1	N	22	YPR189W	0.110625	0.63617	0.373397
6	N	19	YGL175C	0.155255	0.59153	0.373393
12	K	19	YLR323C	0.86624	-0.120027	0.373106
5	I	15	YML027W	0.015405	0.730515	0.37296
3	A	1	YNL225C	0.26566	0.4801	0.37288
5	I	2	YMR021C	0.729475	0.015835	0.372655
10	J	22	YBR086C	0.670327	0.07388	0.372104
1	M	11	YBR112C	0.220488	0.523482	0.371985
5	L	22	YHR111W	0.58743	0.156085	0.371758
2	K	14	YNL059C	0.30855	0.43329	0.37092
4	B	8	YBR223C	0.189455	0.551103	0.370279
10	A	7	YOL137W	0.374063	0.366165	0.370114
8	M	2	YLR016C	0.665493	0.0741775	0.369835
10	I	2	YDR456W	0.32414	0.41405	0.369095
11	C	10	YDR298C	0.306532	0.43127	0.368901
7	F	21	YKL095W	0.503255	0.234258	0.368756
3	O	8	YML057W	0.774343	-0.03713	0.368606
7	C	17	YHR043C	0.584843	0.152205	0.368524
11	P	17	YHL026C	0.418502	0.317945	0.368224
10	F	9	YPL221W	2.01157	-1.27513	0.36822
2	E	4	YGL009C	0.450462	0.285695	0.368079
10	F	23	YML031W	0.386745	0.34854	0.367642
11	L	11	YOR311C	0.367115	0.366485	0.3668
11	H	10	YBR302C	0.897105	-0.16354	0.366783
3	G	8	YPL005W	0.046675	0.686805	0.36674
5	D	12	YOR059C	0.735095	-0.002785	0.366155
6	K	20	YDR044W	0.432943	0.297025	0.364984
8	I	1	YOR179C	1.19572	-0.466625	0.36455
1	J	3	YAL017W	0.544415	0.184682	0.364549
12	H	8	YOR117W	0.5831	0.145838	0.364469
10	D	10	YDL145C	0.218575	0.51018	0.364377
4	E	7	YMR239C	1.42657	-0.697885	0.364345
5	A	9	YML062C	0.617507	0.110095	0.363801
12	M	14	YMR113W	0.729762	-0.0034625	0.36315
6	F	23	YPR004C	0.691898	0.0342075	0.363053
1	L	20	YEL022W	0.139983	0.586075	0.363029
2	H	21	YOR144C	-0.0911375	0.81508	0.361971
10	C	14	YGL186C	-0.507188	1.23096	0.361887
7	B	16	YNL156C	0.75915	-0.035505	0.361822
5	J	17	YDR528W	0.22655	0.49684	0.361695
3	G	4	YLR206W	0.365655	0.3576	0.361627
5	B	7	YGR149W	0.568655	0.15196	0.360308
4	F	6	YGR041W	0.580035	0.14011	0.360073
3	I	19	YEL058W	-0.24341	0.96312	0.359855
1	D	8	YBR275C	0.378795	0.33919	0.358992
1	J	19	YGR233C	0.068995	0.648763	0.358879
1	G	5	YOR048C	0.346998	0.369862	0.35843
8	K	4	YER128W	0.6351	0.08001	0.357555
6	C	12	YDL230W	0.38478	0.32941	0.357095
4	I	22	YDR524C	0.750117	-0.03622	0.356949
2	O	17	YLR266C	0.72282	-0.009265	0.356778
7	H	10	YDR288W	0.185935	0.52719	0.356563
4	N	19	YML032C	0.0244775	0.68827	0.356374
7	O	19	YJR024C	0.12472	0.58312	0.35392
3	F	19	YIL055C	0.29737	0.410035	0.353703
2	N	19	YER169W	0.543713	0.163465	0.353589
7	H	3	YBR101C	0.71031	-0.003495	0.353407
6	I	11	YDR352W	0.40422	0.301943	0.353081
8	N	1	YER018C	0.075735	0.629212	0.352474
6	M	17	YDL124W	0.31955	0.383883	0.351716
5	M	14	YMR010W	0.221435	0.481905	0.35167
11	P	19	YFL045C	0.565063	0.136755	0.350909
1	M	13	YBR073W	0.488333	0.212853	0.350592
9	F	9	YDL123W	0.603945	0.0959075	0.349926
2	F	19	YPL180W	-0.264777	0.96387	0.349546
6	P	4	YNL134C	0.724372	-0.02786	0.348256
1	H	12	YDR283C	0.251418	0.44491	0.348164
5	D	2	YDR363W	0.09468	0.60106	0.34787
1	F	3	YGR061C	0.498085	0.197365	0.347725
4	D	24	YHR009C	-0.176165	0.869437	0.346636
7	G	23	YOR358W	0.184175	0.50783	0.346002
9	A	15	YDL085C-A	0.423048	0.266072	0.34456
11	N	10	YML132W	0.342045	0.345822	0.343934
10	C	17	YER020W	0.552007	0.134082	0.343045
11	B	3	YMR241W	0.417085	0.267632	0.342359
9	J	4	YMR022W	0.259402	0.424102	0.341753
8	C	10	YPL239W	0.778965	-0.0956725	0.341646
10	N	10	YBR023C	0.0969275	0.58579	0.341359
4	E	5	YIL039W	0.26947	0.41178	0.340625
2	L	21	YBR114W	0.570685	0.109537	0.340111
4	L	20	YNL138W	0.440745	0.23887	0.339807
2	N	3	YLL034C	0.427287	0.25054	0.338914
10	L	14	YDL185W	0.504365	0.17051	0.337437
5	C	9	YCR094W	1.10321	-0.429725	0.336743
1	E	4	YER176W	0.01516	0.65756	0.33636
10	E	4	YJL085W	0.67088	0	0.33544
9	D	24	YGR203W	0.0266375	0.64388	0.335259
6	D	24	YFR046C	-0.0208875	0.69101	0.335061
7	I	6	YKL208W	0.262147	0.40791	0.335029
10	E	3	YJR121W	1.01924	-0.35012	0.33456
8	E	22	YDL165W	0.635757	0.033295	0.334526
2	I	16	YDR138W	0.194045	0.474162	0.334104
4	I	1	YJL123C	0.491733	0.175405	0.333569
1	N	4	YER155C	0.546145	0.12092	0.333533
10	M	24	YHL017W	0.803335	-0.1372	0.333068
7	E	1	YPR060C	0.634565	0.031025	0.332795
5	G	19	YOL116W	0.26875	0.396585	0.332668
2	I	14	YDL164C	0.362735	0.301092	0.331914
10	C	4	YBR041W	0.704553	-0.0416675	0.331442
5	F	15	YNL234W	0.939155	-0.276725	0.331215
10	M	9	YGL129C	0.001925	0.65988	0.330902
8	A	22	YGL211W	0.371748	0.286745	0.329246
12	M	9	YMR305C	0.134898	0.523548	0.329223
11	G	5	YGR105W	0.134465	0.523693	0.329079
10	A	20	YOR132W	0.640818	0.016805	0.328811
1	J	13	YHR155W	0.04976	0.607208	0.328484
6	K	17	YBR176W	0.169852	0.486945	0.328399
11	I	3	YJR086W	0.52649	0.129837	0.328164
10	M	20	YHL036W	0.66383	-0.00995	0.32694
6	L	2	YOL047C	0.31565	0.338145	0.326897
4	P	16	YDL170W	0.761227	-0.107865	0.326681
3	C	8	YML071C	0.23087	0.421355	0.326112
2	O	3	YKR018C	0.133235	0.51897	0.326103
10	K	15	YJR117W	0.136373	0.51532	0.325846
1	L	17	YAL001C	0.0358375	0.615745	0.325791
6	E	21	YDR068W	0.0240475	0.62664	0.325344
3	E	9	YKL088W	0.513962	0.136415	0.325189
7	D	10	YPR147C	0.077525	0.5721	0.324813
3	N	1	YLR429W	0.46837	0.18089	0.32463
5	C	18	YNL292W	-0.01374	0.66263	0.324445
1	E	13	YDL190C	0.324235	0.32447	0.324352
6	N	17	YGR101W	0.328645	0.31723	0.322937
10	C	12	YOL020W	0.0602925	0.585392	0.322842
7	F	24	YOL093W	0.509265	0.136242	0.322754
2	D	2	YGL049C	0.60015	0.0447	0.322425
8	B	13	YPR154W	-0.0825475	0.724568	0.32101
8	H	12	YHR008C	0.819887	-0.178985	0.320451
12	N	3	YPR057W	0.392663	0.24796	0.320311
7	B	10	YOR251C	0.54106	0.099425	0.320242
6	I	7	YKR080W	0.212355	0.427768	0.320061
4	E	18	YPR001W	0.406495	0.23361	0.320053
6	O	19	YDL021W	0.143315	0.496762	0.320039
8	L	12	YPL002C	0.001985	0.638025	0.320005
5	I	13	YNL001W	0.77307	-0.1338	0.319635
3	O	9	YLR120C	0.504487	0.1342	0.319344
5	O	15	YGL067W	0.21874	0.419382	0.319061
10	G	9	YNR045W	0.525765	0.11229	0.319028
1	A	2	YML117W	0.227575	0.409567	0.318571
10	D	5	YFR002W	0.72802	-0.091335	0.318342
3	C	10	YOR108W	0.102165	0.53446	0.318312
2	E	14	YOR014W	-0.0202775	0.656875	0.318299
9	B	8	YDR155C	-0.17333	0.809455	0.318063
9	L	24	YMR148W	0.31519	0.320028	0.317609
6	A	6	YJR105W	0.068435	0.56614	0.317288
5	A	3	YBR025C	-0.203428	0.83667	0.316621
9	M	19	YML007C-A	0.264755	0.368125	0.31644
1	L	16	YPR184W	0.398813	0.23388	0.316346
3	I	4	YNL209W	0.4624	0.169935	0.316167
11	J	7	YKR052C	0.274035	0.357155	0.315595
6	O	18	YOR246C	0.028475	0.602102	0.315289
9	A	7	YLR327C	0.151507	0.477907	0.314707
4	K	20	YBR247C	0.352095	0.276645	0.31437
7	H	20	YHR058C	0.0807	0.54789	0.314295
12	L	1	YDL045W-A	0.0229125	0.604513	0.313713
9	I	17	YDL067C	0.11865	0.508337	0.313494
7	H	12	YPR061C	0.086455	0.53992	0.313187
7	M	13	YDL139C	0.60699	0.0189025	0.312946
8	E	8	YKL190W	0.592087	0.03306	0.312574
6	N	15	YGL128C	0.612335	0.01153	0.311933
4	O	17	YML005W	0.2498	0.373872	0.311836
2	J	20	YPR105C	0.55622	0.066985	0.311603
7	A	14	YGL237C	0.501458	0.119475	0.310466
6	E	10	YBR141C	-0.0147125	0.634705	0.309996
7	N	5	YGL221C	0.337225	0.279475	0.30835
12	M	22	YLR094C	0.611677	0.0034625	0.30757
4	O	19	YLR210W	0.450505	0.164282	0.307394
2	I	5	YDR333C	0.481025	0.133763	0.307394
6	K	9	YOR342C	0.864413	-0.24966	0.307376
9	H	12	YCR063W	0.602075	0.01254	0.307308
11	K	14	YLR356W	0.624195	-0.0098675	0.307164
9	J	5	YIR015W	0.497333	0.114913	0.306123
12	L	16	YDR183W	0.543613	0.0683375	0.305975
3	H	4	YDR444W	0.5714	0.040515	0.305957
4	H	2	YDL225W	0.629935	-0.01804	0.305948
6	N	14	YDR322W	-0.164615	0.77523	0.305307
11	I	10	YDL212W	0.48665	0.123232	0.304941
5	E	12	YLR225C	0.306557	0.302783	0.30467
4	A	13	YKL184W	0.068135	0.53998	0.304057
4	G	13	YGL256W	0.216333	0.391327	0.30383
10	F	11	YER017C	0.44529	0.161555	0.303423
11	P	14	YIL076W	-0.350977	0.957	0.303011
6	D	12	YAL036C	0.0729675	0.53218	0.302574
8	G	9	YJL161W	0.456975	0.14791	0.302443
6	O	11	YNR027W	-0.32684	0.930998	0.302079
3	C	5	YHR037W	-2.77556e-17	0.601605	0.300802
2	D	7	YDR251W	0.600995	0	0.300497
5	F	9	YHR132C	0.317405	0.282365	0.299885
10	M	12	YNR055C	-0.001925	0.60114	0.299608
8	I	23	YPL223C	0.39833	0.200285	0.299308
3	L	21	YMR119W	0.01645	0.581415	0.298932
4	F	16	YDL178W	0.556275	0.040985	0.29863
3	M	22	YMR250W	0.159332	0.437013	0.298173
4	F	20	YHR207C	0.32404	0.270355	0.297198
5	H	20	YFL001W	0.0789325	0.51531	0.297121
9	E	7	YNL211C	0.43977	0.152285	0.296027
5	C	23	YJL137C	-0.13394	0.725775	0.295917
8	P	4	YGR247W	0.51581	0.0754275	0.295619
11	P	21	YLR025W	0.463753	0.126945	0.295349
9	L	1	YBR282W	-0.255205	0.845638	0.295216
6	F	5	YBL074C	0.242838	0.346712	0.294775
8	M	23	YJL065C	0.279263	0.310113	0.294687
11	P	22	YNL098C	0.220057	0.36733	0.293694
8	H	4	YOL142W	0.470037	0.116935	0.293486
9	B	3	YGR074W	0.37	0.215705	0.292853
10	K	4	YPR156C	0.0674725	0.51816	0.292816
10	C	7	YGR175C	0.589823	-0.0043175	0.292752
11	N	15	YGR026W	0.387105	0.198208	0.292656
3	I	5	YPR006C	0.05719	0.52807	0.29263
7	C	15	YJR113C	0.353253	0.230705	0.291979
2	B	7	YBL052C	0.229708	0.352715	0.291211
11	O	21	YCR057C	0.366725	0.215553	0.291139
6	B	10	YIL094C	0.25628	0.325555	0.290917
7	H	6	YMR055C	0.748635	-0.167255	0.29069
11	G	14	YDR084C	1.45461	-0.873873	0.290371
11	M	16	YBR164C	0.304308	0.27629	0.290299
6	D	2	YHR112C	-0.133302	0.711365	0.289031
5	L	3	YDL097C	-0.04383	0.6216	0.288885
5	G	20	YER095W	0.063065	0.5135	0.288282
10	E	10	YKR039W	0.342585	0.232835	0.28771
12	L	15	YDR183W	0.670188	-0.0948625	0.287662
11	K	17	YNR051C	0.354195	0.221098	0.287646
11	C	4	YER170W	0.385132	0.18997	0.287551
10	N	17	YBL061C	0.299787	0.274855	0.287321
6	L	17	YCL032W	0.20767	0.36675	0.28721
1	O	6	YOR109W	0.20749	0.365605	0.286548
10	C	22	YBR222C	0.807702	-0.235668	0.286017
8	O	12	YPL067C	0.0253275	0.544558	0.284942
4	F	24	YHR086W	0.121905	0.446215	0.28406
4	H	14	YKL191W	0.36371	0.20275	0.28323
3	P	20	YNL197C	0.423505	0.142815	0.28316
6	L	20	YLR316C	0.63047	-0.06491	0.28278
4	L	8	YLR023C	0.34308	0.221465	0.282272
2	F	12	YDR303C	0.577608	-0.01393	0.281839
7	M	9	YKR041W	0.366665	0.196782	0.281724
3	L	12	YDR295C	0	0.561665	0.280832
5	I	6	YBR168W	0.206985	0.35341	0.280197
3	B	6	YIL105C	-0.0812075	0.641575	0.280184
5	I	14	YHL014C	0.27558	0.284525	0.280052
8	P	3	YIL007C	0.771515	-0.211627	0.279944
11	M	10	YOR089C	0.366777	0.192485	0.279631
12	H	12	YBR163W	0.539845	0.0190525	0.279449
5	I	20	YGR111W	0.24368	0.31506	0.27937
10	D	6	YIL115C	0.312005	0.24576	0.278882
2	G	24	YKL078W	0.771465	-0.21415	0.278658
8	F	17	YER183C	0.640933	-0.0836275	0.278653
5	A	10	YPR118W	0.163068	0.39387	0.278469
7	M	5	YPL124W	-0.03685	0.593568	0.278359
3	K	12	YDR144C	0.338282	0.217245	0.277764
7	G	17	YNL024C	0.078285	0.47705	0.277667
5	H	4	YOL072W	0.510432	0.04233	0.276381
9	G	22	YDR377W	0.1655	0.387215	0.276357
8	H	1	YCR018C	0.519452	0.031835	0.275644
9	N	18	YHR116W	0.6224	-0.07154	0.27543
6	I	17	YOR006C	1.6583	-1.10774	0.275281
11	A	12	YML001W	0.266022	0.28421	0.275116
5	D	6	YBR095C	0.772	-0.222255	0.274873
10	L	2	YER166W	-0.205925	0.75561	0.274842
3	O	2	YPL119C	0.581762	-0.033155	0.274304
7	A	20	YLR201C	0.0421725	0.50629	0.274231
1	H	17	YPL226W	0.200513	0.347505	0.274009
3	G	6	YER036C	0.520025	0.0252	0.272612
12	G	20	YOR074C	0.127683	0.416583	0.272132
6	O	6	YOR061W	-0.028475	0.572532	0.272029
2	E	23	YDR314C	0.0536125	0.489085	0.271349
8	D	24	YJL096W	0.0110075	0.531432	0.27122
9	O	4	YBR253W	1.08292	-0.54049	0.271213
2	K	16	YFR009W	0.59877	-0.05995	0.26941
10	L	18	YHR027C	0	0.536115	0.268058
8	B	6	YJR135C	-0.135648	0.671473	0.267912
9	G	19	YDR034W-B	0.05673	0.478495	0.267613
11	F	20	YEL006W	0.34354	0.190885	0.267213
2	H	24	YAL056W	0.0014275	0.531655	0.266541
12	M	19	YBR288C	0.165593	0.367078	0.266335
6	O	2	YDR411C	0.672805	-0.140462	0.266171
3	K	3	YLR196W	0.261078	0.27041	0.265744
10	G	14	YGL095C	0.375385	0.15592	0.265653
2	B	1	YMR031C	0.501387	0.02945	0.265419
10	I	19	YPR173C	0.113805	0.416635	0.26522
11	L	8	YML067C	0.136585	0.393185	0.264885
3	L	22	YKR036C	0.271195	0.258055	0.264625
3	F	7	YPL269W	0.03583	0.493385	0.264607
4	L	9	YML128C	0.58416	-0.055595	0.264283
5	P	10	YKL075C	-0.18802	0.7165	0.26424
6	L	19	YDR372C	-0.18179	0.71027	0.26424
9	K	2	YEL003W	0.212078	0.3163	0.264189
8	D	19	YDR003W	0.336168	0.192153	0.26416
11	O	14	YNL090W	0.513665	0.0145175	0.264091
2	K	13	YNL021W	0.35486	0.17279	0.263825
6	K	10	YKL151C	-0.311003	0.83865	0.263824
8	O	22	YLR011W	0.183117	0.343432	0.263275
2	C	4	YDR208W	0.5975	-0.071035	0.263233
7	P	12	YLR093C	0.07789	0.447125	0.262508
4	A	6	YJR122W	0.073	0.45097	0.261985
5	K	22	YPL028W	0.446813	0.0769925	0.261902
6	C	8	YBL031W	0.640885	-0.117145	0.26187
6	P	7	YKR011C	0.102852	0.42052	0.261686
8	G	18	YOR122C	0	0.52143	0.260715
4	E	10	YPL219W	0.434575	0.08614	0.260358
2	P	9	YPL153C	0.532335	-0.0120475	0.260144
10	N	16	YFR030W	0.428692	0.090015	0.259354
3	O	20	YJL186W	0.203563	0.313455	0.258509
11	I	5	YML129C	0.041745	0.473687	0.257716
3	O	16	YIL172C	0.281357	0.228105	0.254731
3	M	10	YOR324C	0.270913	0.238262	0.254587
10	F	6	YBR097W	0.145965	0.360995	0.25348
7	E	24	YCL005W	-0.034305	0.540095	0.252895
5	C	3	YCR035C	0.362175	0.14132	0.251748
10	J	4	YBL079W	-0.177973	0.68141	0.251719
11	E	23	YOL064C	0.282297	0.220903	0.2516
10	A	2	YDR484W	-0.591777	1.09484	0.251529
2	K	7	YKL213C	0.445565	0.056865	0.251215
5	O	16	YNL051W	0.414755	0.0876675	0.251211
7	J	4	YKR075C	0.62393	-0.121677	0.251126
6	F	24	YGR048W	-0.0419675	0.544033	0.251032
1	G	4	YOR304W	0.417733	0.0833875	0.25056
5	E	22	YKL189W	-0.151092	0.652168	0.250538
6	E	7	YHL011C	0.0147125	0.48606	0.250386
7	J	17	YJL203W	-0.013765	0.514508	0.250371
6	G	4	YOL007C	0.07193	0.428277	0.250104
4	P	1	YBR227C	0.0058875	0.492995	0.249441
1	N	1	YOR336W	0.66825	-0.169455	0.249397
8	N	12	YBL038W	0.04035	0.458132	0.249241
12	I	13	YDL142C	0.51911	-0.0210525	0.249029
3	D	9	YGL060W	0.358463	0.139375	0.248919
3	M	5	YJR053W	0.104457	0.392317	0.248387
4	B	15	YDL017W	0.296435	0.200313	0.248374
5	E	10	YGR193C	0.171893	0.324842	0.248367
8	C	22	YKR068C	0.08056	0.415863	0.248211
4	M	18	YDL089W	-0.025535	0.521345	0.247905
7	N	14	YJL068C	0.18379	0.31196	0.247875
7	J	9	YKL180W	0.141125	0.353548	0.247336
9	P	24	YBR109C	0.275995	0.217255	0.246625
2	G	20	YOR076C	2.77556e-17	0.49315	0.246575
2	J	4	YNL082W	0.25447	0.23854	0.246505
7	E	8	YDR025W	-2.77556e-17	0.493005	0.246503
8	F	7	YJR074W	0.601258	-0.109507	0.245875
11	L	21	YKL154W	0.05871	0.432835	0.245773
3	O	11	YDR110W	0.488542	0.002625	0.245584
10	L	24	YMR273C	0.536055	-0.04502	0.245517
4	I	11	YOR229W	0.347178	0.143845	0.245511
3	H	3	YBR123C	0.104635	0.38633	0.245482
1	K	4	YJR109C	0.843405	-0.354523	0.244441
6	H	22	YPL096W	0.032745	0.456027	0.244386
5	F	22	YDR170W-A	0.24506	0.243615	0.244337
11	N	6	YGL075C	0.17214	0.316402	0.244271
5	J	15	YGR156W	0.5144	-0.02621	0.244095
8	M	10	YDR032C	0.119048	0.368993	0.24402
7	F	2	YNL177C	-0.38676	0.873938	0.243589
1	C	8	YKL092C	0.150218	0.336938	0.243578
6	J	12	YOR136W	0.14293	0.34408	0.243505
5	G	14	YGL048C	0.449085	0.037875	0.24348
8	C	7	YGR102C	0.19919	0.287403	0.243296
1	F	13	YMR304W	0.06142	0.42351	0.242465
2	G	5	YMR237W	0.32339	0.161405	0.242397
8	P	14	YER002W	1.03123	-0.547482	0.241874
4	L	23	YOL070C	0.455375	0.028205	0.24179
8	C	15	YDR397C	0.534705	-0.0515375	0.241584
4	P	17	YPL181W	0.482583	0.00041	0.241496
7	N	8	YLR455W	0.47984	0.002695	0.241267
4	F	17	YMR169C	0.14446	0.33613	0.240295
8	M	19	YJL124C	-0.245103	0.725668	0.240283
8	M	18	YKR085C	0.364648	0.115763	0.240205
6	C	13	YBR151W	-0.290655	0.77081	0.240077
4	A	5	YPR047W	0.41744	0.06225	0.239845
10	K	23	YDL128W	0.263667	0.21543	0.239549
9	I	18	YJR085C	0.02569	0.453122	0.239406
10	O	16	YMR307W	0.295965	0.181877	0.238921
6	F	10	YNL005C	0.203572	0.273888	0.23873
8	E	4	YBR014C	-0.210303	0.6872	0.238449
3	I	16	YNL227C	0.110715	0.366095	0.238405
7	M	14	YDR405W	0.149895	0.326852	0.238374
11	D	7	YBR085W	0.44756	0.0285875	0.238074
3	L	17	YOR239W	0.3568	0.119115	0.237957
5	D	22	YDL131W	-0.001865	0.47705	0.237592
3	K	11	YPL030W	0.126722	0.348325	0.237524
7	F	15	YJR096W	0.23139	0.243558	0.237474
10	I	24	YER056C	0.18176	0.29254	0.23715
4	N	20	YOR360C	-0.0466375	0.520325	0.236844
4	H	21	YOL068C	0.14801	0.32552	0.236765
3	C	16	YOL066C	0.432475	0.04086	0.236668
10	A	1	YHR007C	0.290982	0.17959	0.235286
10	F	3	YGR157W	0.12548	0.34324	0.23436
9	P	7	YOR252W	0.01119	0.45684	0.234015
8	J	22	YDR304C	0.0501675	0.41606	0.233114
10	H	4	YPL058C	0.46532	0	0.23266
6	I	6	YGR084C	0.447155	0.0172575	0.232206
11	E	2	YGR167W	0.189548	0.274728	0.232137
2	L	13	YDR258C	0.394875	0.0677875	0.231331
4	A	8	YOR269W	-0.19138	0.65386	0.23124
11	G	18	YDL192W	0.42055	0.0409625	0.230756
2	J	22	YDL040C	0.017485	0.44391	0.230697
5	J	12	YFR005C	0.125355	0.335355	0.230355
8	P	5	YDR236C	0.34065	0.119847	0.230249
9	K	12	YCL035C	0.0716475	0.38845	0.230049
3	J	6	YOR249C	0.04085	0.417215	0.229032
12	L	7	YER067W	0.529868	-0.0720125	0.228928
4	K	19	YDR004W	0.29869	0.15823	0.22846
4	N	12	YGR177C	0.117672	0.3383	0.227986
5	J	20	YBL046W	0.019675	0.435255	0.227465
5	E	14	YCL028W	0.0415875	0.411948	0.226768
7	I	10	YKL206C	-0.0167725	0.470065	0.226646
7	M	22	YBL036C	0.27565	0.176833	0.226241
4	B	24	YGL078C	-0.289575	0.741478	0.225951
4	O	12	YDL238C	0.47087	-0.0198375	0.225516
7	D	12	YFL044C	0.493945	-0.04312	0.225413
1	K	23	YBR017C	-0.019005	0.469757	0.225376
2	L	5	YGL073W	-0.373125	0.823817	0.225346
2	F	3	YNL041C	0.383487	0.065945	0.224716
4	G	23	YDR254W	0.300872	0.148108	0.22449
5	F	21	YDL027C	0.117835	0.33046	0.224147
7	C	19	YIR018W	0.0331925	0.413575	0.223384
10	P	17	YDR338C	0.37601	0.0694225	0.222716
2	F	20	YOR217W	-0.307437	0.752785	0.222674
7	D	19	YJL115W	0.205765	0.238425	0.222095
6	G	7	YIL077C	-0.0895	0.533338	0.221919
9	L	22	YOR286W	0.1212	0.321833	0.221516
4	A	19	YMR111C	0.40623	0.03599	0.22111
12	K	11	YNL158W	0.16075	0.281427	0.221089
6	L	9	YBR145W	0.11596	0.326035	0.220998
6	E	14	YHR085W	0.299233	0.14231	0.220771
1	B	17	YML091C	0.47991	-0.0391025	0.220404
1	B	20	YJL095W	0.045635	0.395018	0.220326
10	G	18	YNL219C	0.0673	0.373285	0.220293
9	B	10	YLR042C	0.082215	0.358255	0.220235
10	G	20	YNL048W	0.19454	0.24448	0.21951
3	A	14	YLR060W	0.46435	-0.02574	0.219305
9	M	6	YOL005C	0	0.43834	0.21917
8	A	17	YJL122W	0.784813	-0.347675	0.218569
9	I	7	YBR085C-A	1.39722	-0.960518	0.218351
8	J	24	YNR018W	0.514983	-0.07964	0.217671
2	J	21	YOR353C	0.33791	0.09699	0.21745
5	E	9	YDL022W	0.0670925	0.367468	0.21728
5	N	14	YHR004C	0.373635	0.0584075	0.216021
10	K	22	YMR011W	-0.200978	0.63297	0.215996
3	D	19	YER080W	0.348618	0.083295	0.215956
7	P	5	YGR147C	-0.189075	0.620545	0.215735
6	I	20	YBR129C	0.060255	0.371157	0.215706
3	H	10	YKL179C	0.296105	0.135245	0.215675
11	J	9	YLR018C	0.39924	0.030775	0.215007
1	J	14	YNL242W	0.42067	0.0090725	0.214871
10	I	13	YNR026C	0.42959	2.77556e-17	0.214795
6	E	3	YNL025C	0.415907	0.01266	0.214284
9	A	14	YLR154C	0.0571175	0.371352	0.214235
9	O	16	YOL039W	0.285855	0.141325	0.21359
11	E	4	YPR028W	0.412583	0.0118025	0.212193
1	J	16	YOL004W	0.36976	0.0525125	0.211136
3	K	23	YMR258C	0.442032	-0.019925	0.211054
7	D	9	YDL201W	0.155815	0.266105	0.21096
8	O	3	YOR148C	0.917412	-0.496018	0.210697
1	F	11	YOR227W	0.176385	0.2448	0.210592
1	I	11	YMR287C	0.578592	-0.158612	0.20999
3	H	12	YPL089C	0.24822	0.171245	0.209732
11	G	22	YJL143W	0.362	0.0574575	0.209729
5	P	18	YMR208W	0.22744	0.19184	0.20964
4	E	24	YOR046C	-1.38778e-17	0.416455	0.208228
5	D	17	YGR263C	0.41645	0	0.208225
1	F	5	YBR081C	0.4832	-0.066755	0.208223
4	N	4	YDR232W	0.298442	0.11755	0.207996
4	J	23	YNR012W	0.415935	-3.46945e-18	0.207967
10	C	8	YBR068C	0.507482	-0.0916075	0.207937
3	L	7	YCR038C	0.41584	0	0.20792
2	N	17	YGL234W	0.336133	0.079285	0.207709
8	G	23	YPL108W	0.065645	0.34961	0.207627
9	B	9	YBR167C	0.56734	-0.153495	0.206922
7	N	12	YIL061C	0.61845	-0.205245	0.206603
7	P	4	YAR015W	-0.051455	0.464525	0.206535
2	G	1	YMR277W	0.259635	0.152345	0.20599
7	D	22	YDL076C	0.00652	0.404335	0.205428
7	J	16	YCL031C	0.005435	0.404413	0.204924
11	O	10	YCR027C	0.20323	0.206207	0.204719
6	N	20	YIR021W	0.246705	0.16249	0.204597
4	O	4	YFL027C	0.31147	0.0976625	0.204566
9	D	9	YBR188C	0.319312	0.08865	0.203981
6	L	21	YDL175C	0.015785	0.39149	0.203637
3	L	1	YGR083C	0.05082	0.356255	0.203537
2	P	17	YPL190C	-0.07968	0.485457	0.202889
9	H	21	YCR082W	0.258425	0.14715	0.202788
9	M	21	YGR217W	0.026005	0.3794	0.202703
10	D	24	YCR037C	0.07083	0.332095	0.201462
4	I	20	YOR216C	-0.0282125	0.431095	0.201441
8	D	18	YOL102C	0.451748	-0.0501125	0.200818
7	J	12	YPL079W	-0.162115	0.563192	0.200539
11	P	20	YBR104W	0.354293	0.046145	0.200219
3	J	17	YNR038W	-0.30575	0.706155	0.200202
11	J	5	YMR056C	0.293755	0.105905	0.19983
7	C	6	YGR042W	0.132133	0.267455	0.199794
2	K	19	YLR452C	-0.03066	0.43013	0.199735
9	O	18	YDR281C	0.198995	0.199985	0.19949
7	F	11	YLR136C	-0.02495	0.423723	0.199386
6	I	1	YBR211C	1.84811	-1.45156	0.198271
6	J	23	YLR375W	0.20809	0.188375	0.198232
9	K	24	YIL008W	0.196327	0.19961	0.197969
3	J	8	YBR117C	0.05723	0.33825	0.19774
3	C	7	YLL012W	0.20009	0.194975	0.197532
10	H	22	YGL167C	0.84434	-0.44951	0.197415
7	B	5	YOR385W	0.112185	0.281495	0.19684
8	I	10	YKL156W	0.327865	0.065145	0.196505
2	A	12	YOR361C	0.0273025	0.36532	0.196311
2	B	14	YJL056C	0.340792	0.05128	0.196036
10	D	8	YGL092W	0.30352	0.087295	0.195408
1	N	17	YJL076W	0.568385	-0.17855	0.194918
7	J	2	YOR107W	0.451445	-0.0618325	0.194806
4	I	24	YDR181C	0.506382	-0.117265	0.194559
8	N	3	YBR066C	0.227705	0.160887	0.194296
5	G	17	YDR309C	0.00046	0.387125	0.193792
5	J	22	YGL164C	0.043485	0.34241	0.192948
12	H	20	YOR074C	0.03995	0.345813	0.192881
12	M	6	YBR087W	0.399917	-0.0149825	0.192467
10	O	7	YOL062C	-0.066775	0.450497	0.191861
2	I	2	YHR182W	0.205335	0.178248	0.191791
1	A	16	YJL050W	0.40717	-0.0239675	0.191601
9	I	8	YML101C	-0.06521	0.448217	0.191504
3	K	21	YJL153C	0.115843	0.266905	0.191374
9	B	22	YDL121C	0.196795	0.1855	0.191147
11	C	18	YOR094W	0.369843	0.011985	0.190914
7	L	17	YML041C	-0.2809	0.66267	0.190885
3	N	16	YML088W	0.204145	0.17718	0.190663
7	G	1	YDL136W	0.54315	-0.162835	0.190158
1	H	7	YKL215C	0.365847	0.01263	0.189239
2	H	2	YDR213W	0.194032	0.184315	0.189174
7	E	5	YOR004W	0.061815	0.315225	0.18852
1	D	10	YKL014C	0.241985	0.13428	0.188133
1	D	12	YML059C	0.09563	0.280255	0.187942
7	P	15	YNL032W	0.27382	0.10004	0.18693
12	H	19	YOR074C	0.078165	0.295637	0.186901
10	H	3	YJL041W	0.26629	0.10703	0.18666
5	B	20	YCR079W	0.39446	-0.02149	0.186485
1	P	3	YLR384C	0.53482	-0.161975	0.186422
9	O	3	YDR250C	0.300675	0.07176	0.186218
11	B	7	YOL092W	0.03326	0.338842	0.186051
11	N	19	YMR200W	0.28337	0.0878475	0.185609
4	K	14	YNL053W	-0.765935	1.13577	0.184917
7	K	8	YML024W	0.623535	-0.254663	0.184436
6	N	18	YML131W	0.351565	0.01698	0.184273
1	I	16	YIL156W	-0.0299325	0.398352	0.18421
4	M	4	YCL017C	-0.197015	0.564455	0.18372
9	N	3	YER035W	0	0.366535	0.183267
5	O	7	YLR449W	-0.07733	0.443018	0.182844
2	L	19	YCR077C	-0.105495	0.470457	0.182481
4	I	23	YJL044C	0.360198	0.00468	0.182439
11	M	18	YIL111W	0.220617	0.14403	0.182324
2	I	3	YLR219W	0.2646	0.0995175	0.182059
3	K	22	YKR078W	0.577198	-0.213185	0.182006
5	F	13	YDL155W	0.16325	0.20011	0.18168
10	K	14	YBR296C	0.0024425	0.35938	0.180911
8	O	23	YKL026C	0.440987	-0.0804825	0.180252
7	B	14	YLR146C	0.3604	0	0.1802
8	L	22	YGL166W	-0.155355	0.5154	0.180022
4	P	14	YMR297W	0.256153	0.10125	0.178701
1	B	1	YJL042W	-0.257965	0.614873	0.178454
9	L	6	YBR077C	0.436115	-0.0793925	0.178361
1	F	16	YLR247C	0.32171	0.034175	0.177943
7	L	1	YLR003C	0.179995	0.175515	0.177755
3	D	13	YNL176C	-0.0012125	0.35484	0.176814
8	F	11	YER007C-A	-0.0081325	0.361737	0.176803
7	F	18	YML112W	0.25362	0.0997525	0.176686
8	N	11	YGR129W	0.35343	-8.75e-05	0.176671
4	B	7	YMR285C	0.32968	0.0234875	0.176584
9	O	20	YGR063C	0.755295	-0.40383	0.175733
10	E	11	YLR378C	0.15607	0.194835	0.175453
2	L	6	YGL163C	0.00742	0.342907	0.175164
3	N	11	YHR161C	-0.26959	0.61944	0.174925
8	G	21	YJL016W	0.111695	0.23815	0.174923
10	H	2	YLR310C	-7e-05	0.34947	0.1747
10	F	4	YOR153W	0.1291	0.21773	0.173415
9	O	5	YKL053C-A	-0.134575	0.48106	0.173242
7	E	13	YML113W	-0.231935	0.57735	0.172708
1	B	13	YFR016C	0.150335	0.194857	0.172596
7	B	22	YPL241C	0.126035	0.21893	0.172483
8	K	10	YAL008W	0.032925	0.31193	0.172427
3	A	17	YDR261C	0.09427	0.24916	0.171715
12	K	21	YOL088C	0.296385	0.0463225	0.171354
3	I	14	YDR101C	0.2393	0.103375	0.171338
7	G	20	YCL010C	0	0.342455	0.171228
6	D	5	YBL068W	0.0208875	0.32147	0.171179
5	B	5	YPL145C	0.14224	0.200115	0.171177
7	J	21	YLR290C	0.26061	0.0816875	0.171149
1	E	2	YGL151W	-0.37795	0.71983	0.17094
6	H	15	YMR234W	0.237955	0.103368	0.170661
10	K	12	YNL065W	0.0194125	0.32133	0.170371
9	B	18	YLR315W	0.04705	0.29359	0.17032
4	L	5	YPR002W	1.38778e-17	0.340065	0.170033
5	B	6	YPR125W	0.368175	-0.02858	0.169797
1	L	2	YLR454W	0.490687	-0.151295	0.169696
5	C	20	YPR023C	0.194255	0.14338	0.168818
3	G	12	YPL243W	0.566745	-0.23208	0.167333
8	L	17	YOR236W	0.0807	0.25364	0.16717
1	G	3	YDR028C	0.209932	0.124012	0.166972
5	B	24	YGR252W	-0.009675	0.34352	0.166923
10	K	20	YFR051C	-0.102523	0.43634	0.166909
5	H	24	YGR254W	0.238038	0.09532	0.166679
11	O	9	YBR289W	0.23349	0.0994825	0.166486
8	N	21	YFL046W	0.0498	0.282952	0.166376
3	D	10	YIR003W	0.396162	-0.06346	0.166351
9	J	24	YMR059W	0.452307	-0.120167	0.16607
2	A	2	YNR033W	0.0092475	0.322055	0.165651
2	K	6	YKL134C	0.165075	0.1648	0.164938
9	J	10	YER030W	0.0098875	0.319512	0.1647
11	G	3	YEL039C	-0.08349	0.410573	0.163541
8	F	19	YER079W	0.102352	0.224293	0.163323
4	E	19	YLR005W	0.40179	-0.07532	0.163235
5	D	11	YOR209C	0.239765	0.085345	0.162555
3	F	16	YBL051C	0.357735	-0.03333	0.162203
10	M	16	YHR045W	0.428045	-0.10364	0.162202
2	I	20	YDL234C	0.070235	0.252688	0.161461
9	N	23	YER092W	0.053575	0.269055	0.161315
4	F	10	YHR006W	0.33821	-0.01664	0.160785
11	F	15	YPL076W	0.865175	-0.544385	0.160395
6	J	8	YDL211C	0.138285	0.182115	0.1602
9	O	19	YDL133C-A	0.21943	0.099845	0.159637
2	N	12	YKL073W	0.333348	-0.015005	0.159171
7	M	17	YLR211C	-0.130965	0.449213	0.159124
7	P	1	YLR367W	-0.370715	0.688785	0.159035
7	I	11	YDL202W	0.119087	0.197425	0.158256
8	E	1	YMR255W	0.195882	0.11993	0.157906
3	O	18	YIL015W	-0.139363	0.45385	0.157244
1	O	5	YOL021C	1.07196	-0.75899	0.156485
5	G	23	YAL032C	0.04051	0.271365	0.155938
10	L	23	YLR139C	0.31174	0	0.15587
4	F	4	YBR158W	-0.03476	0.34628	0.15576
10	P	7	YMR257C	-0.217055	0.528133	0.155539
10	O	15	YER136W	0.324325	-0.0160425	0.154141
4	B	6	YKL140W	0.379785	-0.0715675	0.154109
10	H	6	YER105C	0.189075	0.117155	0.153115
3	I	9	YDR026C	0.210065	0.09612	0.153092
5	K	6	YBR233W	-0.375812	0.681438	0.152813
10	N	11	YNL272C	-0.143888	0.44886	0.152486
7	I	16	YAL027W	0.124768	0.180095	0.152431
3	F	15	YOR181W	0.1429	0.16098	0.15194
5	E	23	YOL043C	-0.0325075	0.333027	0.15026
11	E	24	YHR051W	0.141538	0.158757	0.150147
10	G	23	YCL052C	0	0.29959	0.149795
8	E	11	YDR540C	-0.0235925	0.32312	0.149764
1	D	23	YDR128W	0.005885	0.2935	0.149692
11	M	12	YGL200C	0.0539025	0.24544	0.149671
4	M	22	YHR024C	0.069775	0.229245	0.14951
11	J	4	YBR042C	0.20555	0.09341	0.14948
3	E	14	YMR198W	0.127007	0.17121	0.149109
2	N	16	YIL066C	0.321582	-0.023445	0.149069
2	G	18	YOR208W	-0.27073	0.567575	0.148423
9	A	21	YDL184C	0.630232	-0.333417	0.148407
4	C	22	YNL239W	-0.32875	0.62459	0.14792
6	J	20	YPL236C	0.12895	0.16648	0.147715
1	J	10	YDL140C	0.270065	0.0240975	0.147081
2	M	14	YER098W	0.16764	0.12617	0.146905
11	O	12	YJL004C	0.322795	-0.0290875	0.146854
8	F	4	YNL129W	-0.0671125	0.360818	0.146852
5	C	19	YKL113C	0	0.293275	0.146638
4	M	8	YGR256W	0.25997	0.031665	0.145817
7	P	10	YKL150W	-0.26371	0.553455	0.144873
5	N	18	YKR044W	0.292	-0.0024375	0.144781
3	E	15	YBR286W	0.327008	-0.03746	0.144774
2	L	15	YPL207W	0.32238	-0.0337675	0.144306
2	N	9	YOR195W	0.0795475	0.20855	0.144049
6	G	19	YHR144C	1.18415	-0.896262	0.143944
7	D	17	YBL010C	0.600315	-0.312515	0.1439
7	L	2	YOR292C	0	0.28662	0.14331
4	I	21	YLR090W	0.257698	0.02768	0.142689
9	A	1	YPL047W	-0.481193	0.765652	0.14223
10	J	5	YFL004W	0.401888	-0.11749	0.142199
7	H	13	YDR361C	-0.22271	0.506385	0.141838
8	M	9	YBR082C	0.0368025	0.245443	0.141123
1	B	8	YHR023W	0.0801	0.200827	0.140464
5	P	3	YOR117W	-0.436705	0.7176	0.140448
7	L	13	YJR111C	-0.294775	0.57563	0.140427
3	I	18	YPL007C	0.280715	0	0.140357
1	I	18	YDR310C	-0.0056025	0.285838	0.140118
7	D	1	YBR152W	0.21102	0.06814	0.13958
2	M	5	YGR178C	-0.25933	0.53816	0.139415
9	K	6	YNL111C	-0.0716475	0.35019	0.139271
12	P	7	YDR129C	-0.0125325	0.29065	0.139059
10	L	19	YBR043C	0.18961	0.088445	0.139027
3	H	2	YDR332W	0	0.277965	0.138983
9	A	18	YOL048C	-0.0991025	0.376207	0.138552
9	C	4	YGL070C	-0.03371	0.310425	0.138357
6	F	6	YDR171W	0.0419675	0.234453	0.13821
4	H	24	YHR216W	-0.037975	0.314335	0.13818
5	H	13	YGR244C	-0.0549475	0.33117	0.138111
5	O	17	YGL209W	0.2072	0.0685625	0.137881
1	G	2	YKL105C	0.208893	0.0663575	0.137625
10	G	19	YNL280C	0.18329	0.090265	0.136777
1	I	14	YOL145C	0.349357	-0.0758475	0.136755
9	B	14	YOR044W	0.06473	0.208205	0.136467
4	O	3	YMR044W	0.002775	0.268423	0.135599
2	N	18	YLR001C	0.0589025	0.212115	0.135509
10	A	16	YDR345C	-0.406878	0.677615	0.135369
8	L	19	YOR247W	0.06157	0.20899	0.13528
8	K	3	YDL053C	0.178525	0.091835	0.13518
9	F	23	YKL169C	0.00504	0.264547	0.134794
10	H	19	YLR396C	0.011085	0.258405	0.134745
6	H	21	YPR127W	-0.04235	0.311078	0.134364
12	L	3	YLR408C	0.105883	0.162543	0.134213
10	N	23	YNL095C	0.182877	0.085105	0.133991
5	C	7	YJR032W	0.32781	-0.06023	0.13379
11	B	13	YBR002C	-0.02833	0.295882	0.133776
10	F	1	YNR013C	0.41102	-0.145685	0.132667
9	L	20	YMR159C	0.265905	-0.0007025	0.132601
8	I	7	YML078W	-0.02329	0.28759	0.13215
4	N	18	YGL056C	0.571392	-0.30762	0.131886
4	N	3	YKL116C	-0.272583	0.53559	0.131504
5	N	17	YJR084W	0.26013	0.0024375	0.131284
3	J	2	YBL067C	-0.04371	0.305365	0.130827
11	N	14	YGR028W	0.1098	0.150893	0.130346
9	N	17	YKL138C	0.00915	0.251195	0.130172
2	F	4	YFR040W	0.346203	-0.08592	0.130141
4	B	2	YML069W	0.197565	0.0622325	0.129899
4	H	20	YML086C	0.21208	0.047475	0.129777
4	A	10	YOL112W	0.109765	0.14971	0.129738
11	G	23	YGR117C	0.077265	0.181718	0.129491
11	L	15	YBR185C	0.239365	0.017955	0.12866
8	J	10	YIL161W	-0.0501675	0.307355	0.128594
9	C	19	YDL061C	0.734935	-0.47805	0.128443
3	K	18	YDL174C	0.235588	0.02098	0.128284
7	M	21	YDR092W	-0.07469	0.331253	0.128281
10	K	24	YNL130C	0.410712	-0.15538	0.127666
3	A	15	YJR103W	0.23779	0.01753	0.12766
4	C	9	YIL074C	0.656315	-0.40279	0.126763
9	E	9	YMR122W-A	0.24551	0.00579	0.12565
1	A	17	YMR019W	0.503325	-0.252833	0.125246
9	F	16	YKR074W	0.180485	0.0696925	0.125089
2	J	15	YOR162C	0.079655	0.170085	0.12487
2	K	21	YPR008W	0	0.24963	0.124815
6	D	22	YLR141W	0.353527	-0.10393	0.124799
10	M	2	YEL065W	-0.059175	0.30851	0.124668
3	M	12	YDR349C	0.608248	-0.358938	0.124655
5	L	14	YFR014C	0.03878	0.210205	0.124493
3	B	9	YMR313C	-0.0834325	0.3314	0.123984
8	I	3	YNR024W	0.828465	-0.58069	0.123887
7	C	12	YGL174W	0.166862	0.08063	0.123746
3	D	11	YJR130C	0.320227	-0.07302	0.123604
3	K	17	YEL020C	0.161672	0.085515	0.123594
3	I	3	YIR010W	0.198935	0.04651	0.122722
10	I	23	YNL323W	-0.175765	0.42007	0.122152
7	O	18	YGR253C	0.21866	0.024795	0.121728
11	B	4	YER154W	0.201005	0.0420775	0.121541
2	K	17	YOR033C	0.32267	-0.0802	0.121235
9	J	3	YPL225W	0.687662	-0.446877	0.120392
11	J	1	YOL096C	0.199725	0.04087	0.120298
3	P	12	YBR212W	-0.148275	0.388795	0.12026
3	E	2	YDL063C	0.0298775	0.2105	0.120189
9	D	10	YLR050C	0.278438	-0.03924	0.119599
2	J	17	YLR182W	0.23884	0	0.11942
3	N	4	YLR260W	0.2463	-0.0082	0.11905
4	K	23	YPR080W	0.268225	-0.03049	0.118868
6	H	20	YPL081W	0.067605	0.170047	0.118826
8	F	9	YOR258W	0.222617	0.0143175	0.118468
4	L	21	YLR033W	0.315085	-0.078305	0.11839
10	L	3	YBR179C	-0.059505	0.29416	0.117327
4	M	16	YGR211W	-0.1635	0.39805	0.117275
10	G	3	YMR004W	0.474365	-0.24067	0.116847
8	K	20	YCL026C-A	-0.1456	0.378575	0.116487
11	M	11	YDR235W	-0.0367925	0.26969	0.116449
10	P	5	YIL140W	0.125135	0.107262	0.116199
9	P	20	YPL059W	0.41465	-0.182425	0.116113
2	G	16	YBR102C	0.26651	-0.035105	0.115702
7	K	18	YLR285W	0.047235	0.182298	0.114766
2	E	10	YDL028C	0.0904525	0.138395	0.114424
6	J	7	YDR451C	-0.09288	0.32171	0.114415
3	B	2	YIL144W	-0.315468	0.544225	0.114379
6	B	22	YKR077W	0.196085	0.03166	0.113873
11	D	5	YJL196C	0.00451	0.222997	0.113754
8	L	8	YMR134W	0.260095	-0.032605	0.113745
1	K	13	YMR205C	-0.16109	0.387248	0.113079
6	K	13	YNR054C	0.259858	-0.033805	0.113026
10	I	14	YNL275W	0.625	-0.39902	0.11299
3	O	12	YGR246C	0.0115925	0.214145	0.112869
6	H	9	YKR070W	0.000495	0.225123	0.112809
9	N	21	YCR043C	0.241525	-0.016245	0.11264
11	D	16	YMR079W	0.165395	0.0598575	0.112626
10	L	8	YJL080C	0.184715	0.03986	0.112287
8	D	22	YMR233W	-0.155748	0.380323	0.112287
8	A	15	YPL038W	0.0576725	0.166705	0.112189
4	J	15	YGR155W	0.04317	0.17979	0.11148
5	O	5	YGR012W	-0.119805	0.341743	0.110969
8	F	1	YOL135C	0.568653	-0.347882	0.110385
8	L	5	YLR178C	0.187975	0.032605	0.11029
11	K	8	YLR262C	0.19593	0.0245875	0.110259
8	O	21	YDR073W	-0.0769425	0.296928	0.109993
7	F	17	YHR067W	0.38149	-0.161912	0.109789
11	I	21	YPL204W	0.016635	0.202547	0.109591
4	J	6	YMR199W	0.28581	-0.06684	0.109485
7	N	9	YOR281C	0	0.21862	0.10931
8	F	16	YLR298C	0.308767	-0.0902525	0.109257
5	D	7	YLR387C	0.15995	0.057425	0.108687
4	E	13	YGL184C	0.174345	0.04201	0.108177
1	K	18	YNL278W	0.05286	0.162048	0.107454
4	P	7	YDR169C	-0.278647	0.493125	0.107239
6	P	18	YMR270C	0.0522825	0.1616	0.106941
1	F	9	YDL195W	0.236255	-0.024475	0.10589
1	N	14	YJR138W	0.10001	0.111515	0.105763
8	E	24	YML094W	-0.151127	0.359415	0.104144
3	A	4	YPR155C	0.15416	0.05366	0.10391
6	B	4	YGL105W	0.448075	-0.24034	0.103868
5	M	5	YEL050C	0.079025	0.128435	0.10373
8	C	11	YDR185C	0.15585	0.0515375	0.103694
4	F	8	YOR002W	-0.297615	0.50426	0.103323
6	P	23	YGL040C	0.155872	0.048975	0.102424
5	O	18	YNL254C	0.17914	0.0246475	0.101894
5	H	21	YER059W	0.490818	-0.28755	0.101634
8	J	11	YDR177W	0.577658	-0.374605	0.101526
2	H	11	YOR322C	0.297982	-0.09521	0.101386
6	O	14	YGR043C	-0.267045	0.469452	0.101204
10	J	19	YMR301C	0.0356425	0.165585	0.100614
4	B	16	YDL020C	0.002655	0.198478	0.100566
11	A	7	YMR256C	0.386983	-0.1862	0.100391
2	K	11	YLR440C	0.21772	-0.01742	0.10015
4	J	9	YML120C	-0.3941	0.59434	0.10012
7	N	11	YNL286W	0.06551	0.134395	0.0999525
6	G	2	YMR144W	-0.12616	0.325933	0.0998863
6	L	15	YDR439W	0	0.19863	0.099315
10	G	16	YDR062W	0.200035	-0.00174	0.0991475
3	L	8	YKL126W	0.20021	-0.00325	0.09848
11	N	24	YIL117C	0.14409	0.0516675	0.0978788
1	G	24	YIL031W	0.0157775	0.179847	0.0978125
2	C	7	YMR192W	0.014255	0.17984	0.0970475
9	G	8	YJR146W	-0.055765	0.24882	0.0965275
6	O	4	YHR156C	0.363255	-0.170598	0.0963287
8	O	18	YNL282W	0.159482	0.0310375	0.09526
8	L	6	YHR013C	-0.001985	0.19231	0.0951625
10	D	9	YJL212C	-0.16404	0.354065	0.0950125
9	E	1	YLL018C-A	-0.12446	0.31405	0.094795
1	O	21	YER032W	0	0.18803	0.094015
4	F	19	YNL241C	0.515305	-0.32749	0.0939075
10	C	10	YOR370C	-0.471162	0.658857	0.0938475
4	G	9	YLR058C	-0.340803	0.527358	0.0932775
6	E	4	YKL164C	0.218183	-0.03191	0.0931363
9	K	11	YDR210W	0.181553	0.004025	0.0927888
1	P	17	YEL025C	0.15365	0.02958	0.091615
4	O	14	YPL262W	0.00909	0.173833	0.0914612
8	K	22	YGL147C	0.25567	-0.072985	0.0913425
6	M	22	YIL063C	0.27912	-0.0975875	0.0907662
9	F	15	YDR511W	0.232015	-0.0505125	0.0907513
7	H	9	YER023W	0.177395	0.003495	0.090445
7	H	17	YHR163W	-0.157495	0.337755	0.09013
7	F	23	YDL051W	0.02495	0.154298	0.0896238
6	B	13	YLR270W	-0.5032	0.682	0.0894
11	K	12	YDL072C	0.168805	0.0098675	0.0893363
7	B	19	YGL005C	-0.10332	0.28133	0.089005
5	J	16	YGL059W	-0.003595	0.179855	0.08813
12	E	19	YBR235W	0.103443	0.0722075	0.087825
10	E	2	YHR117W	0.34331	-0.1685	0.087405
1	A	6	YOL087C	0.08561	0.0889375	0.0872738
2	J	8	YBL014C	0.161065	0.01258	0.0868225
1	E	20	YDR325W	-0.253535	0.42405	0.0852575
9	F	7	YLR245C	0.119685	0.0505125	0.0850988
7	E	9	YER062C	-0.08429	0.25218	0.083945
8	D	12	YNL100W	-0.0110075	0.178108	0.08355
9	F	24	YHR136C	-0.00504	0.171777	0.0833687
5	M	10	YHR097C	0.10066	0.06321	0.081935
10	J	23	YNL115C	0.0866525	0.07689	0.0817712
7	C	13	YDR050C	-0.148063	0.310245	0.0810912
10	P	16	YPR032W	0.258905	-0.0967275	0.0810888
1	C	13	YOL090W	0.0521925	0.109698	0.080945
1	L	1	YIL159W	0.398803	-0.23755	0.0806262
4	G	12	YDR523C	-0.0624275	0.223078	0.080325
9	D	8	YDR179C	0.149523	0.01099	0.0802563
8	C	9	YPR187W	0.51264	-0.353492	0.0795737
2	A	11	YOL057W	-0.0598625	0.219	0.0795687
1	J	4	YJL130C	0.231975	-0.0733125	0.0793312
12	P	10	YLR006C	0.108857	0.04726	0.0780587
7	D	18	YER142C	0.355585	-0.201	0.0772925
2	K	15	YBR131W	-0.004295	0.157975	0.07684
11	L	9	YLR348C	0.072585	0.079835	0.07621
3	D	8	YLR153C	0.693837	-0.541815	0.0760112
7	N	3	YGR205W	-0.182735	0.33394	0.0756025
4	G	1	YPL066W	0.0698475	0.0810125	0.07543
7	H	21	YKL023W	-0.02086	0.170915	0.0750275
6	K	14	YDL108W	-0.439308	0.589065	0.0748787
1	B	9	YPL137C	-0.18345	0.333072	0.0748112
4	K	18	YLR108C	0.031195	0.11791	0.0745525
4	O	8	YNL124W	0.192355	-0.0432675	0.0745437
11	M	14	YLR292C	0.0229725	0.125545	0.0742587
1	N	7	YMR012W	0	0.148255	0.0741275
4	B	14	YDR147W	0.05094	0.0967925	0.0738662
9	C	22	YNL300W	0.112705	0.03467	0.0736875
8	E	6	YKL001C	0.392767	-0.248035	0.0723662
9	O	6	YER131W	0.190355	-0.04565	0.0723525
7	I	3	YER153C	0.358503	-0.21382	0.0723412
2	H	18	YDR422C	-0.205728	0.35022	0.0722462
2	J	16	YCR030C	0.22308	-0.07992	0.07158
8	A	1	YLR254C	-0.0579075	0.20103	0.0715612
9	O	22	YKL102C	0	0.142745	0.0713725
4	K	21	YNL309W	0.050065	0.09219	0.0711275
10	M	15	YOR307C	0.461035	-0.31887	0.0710825
1	D	11	YDR293C	-0.038875	0.18017	0.0706475
10	L	9	YNL212W	-0.015025	0.15579	0.0703825
8	A	11	YBR137W	-0.0576725	0.1981	0.0702137
1	H	3	YDR301W	0.372893	-0.23259	0.0701513
9	M	23	YIL149C	0.005805	0.13447	0.0701375
8	C	23	YPR063C	-0.01349	0.153298	0.0699038
4	G	19	YBL098W	0.0624275	0.0769475	0.0696875
3	D	18	YBR260C	0.0012125	0.138115	0.0696637
3	I	22	YJR016C	0.126645	0.011955	0.0693
1	I	15	YNL127W	-0.132298	0.270207	0.068955
10	H	13	YOR321W	-0.25549	0.39338	0.068945
4	G	3	YLR142W	0.254138	-0.116583	0.0687775
3	M	9	YKL127W	-0.344938	0.482457	0.06876
10	F	19	YHR042W	0.026675	0.109925	0.0683
10	O	11	YPL259C	0.161815	-0.0260975	0.0678587
6	J	9	YNL007C	0.17518	-0.040845	0.0671675
6	I	13	YNL058C	0.13083	0.0030675	0.0669488
10	A	4	YHL040C	0.158493	-0.024695	0.0668987
11	A	21	YGR034W	0.0277225	0.10516	0.0664413
11	K	4	YGL210W	0.11151	0.0207025	0.0661063
9	A	19	YOR298C-A	0.0819725	0.0492775	0.065625
5	H	8	YGL194C	0.574518	-0.443465	0.0655263
1	E	22	YNL327W	0.25121	-0.12021	0.0655
4	J	18	YER025W	-0.049785	0.18077	0.0654925
7	O	9	YLL027W	-0.26784	0.39793	0.065045
5	G	16	YLR107W	0.051015	0.07768	0.0643475
10	N	14	YCR067C	-0.221087	0.349415	0.0641637
11	O	18	YBR254C	0.01837	0.109592	0.0639813
5	M	16	YGR214W	-0.115015	0.24262	0.0638025
6	G	12	YFR025C	-0.12227	0.249727	0.0637288
5	F	1	YIL135C	0.306165	-0.18033	0.0629175
6	N	2	YBL029W	0.452325	-0.326495	0.062915
2	N	8	YLR382C	-0.0519625	0.177485	0.0627613
7	C	20	YPL163C	-0.0099925	0.13496	0.0624838
11	D	19	YPR183W	0.08582	0.0383975	0.0621087
10	E	9	YIL088C	-0.05433	0.17805	0.06186
9	C	11	YLR325C	0	0.12291	0.061455
3	G	9	YOR128C	0.11254	0.010285	0.0614125
11	F	8	YDR498C	0.111635	0.010815	0.061225
11	L	10	YJL053W	0.047235	0.07353	0.0603825
11	L	24	YCR069W	0.08456	0.036175	0.0603675
6	I	8	YJL088W	0.12172	-0.0030675	0.0593262
5	N	3	YDR448W	0.087565	0.0308325	0.0591987
5	D	5	YGL134W	0.114965	0.00317	0.0590675
7	I	21	YHR127W	0.0167725	0.10132	0.0590462
3	B	14	YDR362C	0.648162	-0.530225	0.0589688
9	C	13	YDR079C-A	0.11462	0.002545	0.0585825
8	A	10	YOR367W	0.0603725	0.05664	0.0585062
7	J	23	YKR006C	-0.005435	0.119898	0.0572312
11	H	20	YPL215W	0.05231	0.062055	0.0571825
9	H	5	YCL056C	-0.04835	0.1627	0.057175
2	O	16	YDR001C	-0.25039	0.364735	0.0571725
3	G	19	YDR358W	0.000845	0.113475	0.05716
8	C	16	YDR022C	-0.04335	0.157018	0.0568338
8	M	11	YDR059C	-0.140918	0.254563	0.0568225
3	L	2	YBR259W	0.14326	-0.031425	0.0559175
3	D	21	YNL299W	-0.489573	0.60095	0.0556887
3	J	22	YHR015W	0.269495	-0.158965	0.055265
7	M	3	YIR035C	-0.33807	0.448373	0.0551513
10	M	8	YNR039C	0.110125	0	0.0550625
4	A	2	YDR036C	-0.52927	0.63882	0.054775
9	E	22	YDR139C	-0.093995	0.203295	0.05465
10	N	20	YGL238W	0.403077	-0.293965	0.0545563
2	J	1	YOR133W	-0.733575	0.84243	0.0544275
7	O	11	YNR009W	0.05767	0.050485	0.0540775
8	N	23	YDR231C	0.17131	-0.0631975	0.0540562
3	P	11	YOR070C	-0.123315	0.230995	0.05384
10	M	14	YGR055W	0.055855	0.05079	0.0533225
10	K	2	YER005W	-0.233077	0.33928	0.0531013
7	I	20	YEL012W	-0.122457	0.228485	0.0530137
9	G	23	YFL007W	0.10237	0.00357	0.05297
8	F	23	YIL127C	0.0378775	0.0677075	0.0527925
5	E	7	YLR418C	0.0289325	0.0749925	0.0519625
3	L	11	YNL020C	-0.07282	0.176185	0.0516825
4	O	10	YOL049W	-0.22309	0.326143	0.0515262
7	D	3	YOR344C	0	0.102775	0.0513875
6	D	11	YNL164C	0.0789125	0.023605	0.0512588
11	D	2	YNL064C	-0.01764	0.119938	0.0511487
8	L	10	YJR050W	-0.06066	0.162875	0.0511075
11	G	20	YGR174C	0.158505	-0.0568275	0.0508388
5	B	23	YBR271W	0.033765	0.067885	0.050825
11	O	13	YDL117W	-0.086965	0.188073	0.0505538
6	N	21	YER016W	-0.18662	0.28736	0.05037
2	F	16	YNL221C	0.0864425	0.01393	0.0501863
6	I	4	YOR026W	-0.317025	0.416258	0.0496163
1	B	7	YDR159W	-0.045635	0.144453	0.0494088
9	M	16	YDL081C	0.74719	-0.649375	0.0489075
1	B	2	YLR106C	-0.13526	0.232917	0.0488288
8	G	5	YGL018C	0.096725	0	0.0483625
5	H	18	YMR268C	0.0579875	0.0381	0.0480437
3	N	2	YER077C	-0.0122	0.10745	0.047625
2	H	13	YLR095C	0.0950225	0	0.0475112
7	N	22	YGR222W	0.236105	-0.1411	0.0475025
2	H	12	YOR058C	-0.336363	0.4308	0.0472188
7	L	18	YDL173W	0.01849	0.075795	0.0471425
1	E	9	YBL005W	0.38785	-0.294205	0.0468225
7	H	5	YAL034W-A	0.50253	-0.40991	0.04631
10	M	23	YDR331W	0.33562	-0.24346	0.04608
6	N	23	YIL106W	0.286405	-0.194765	0.04582
1	A	19	YJL154C	0.423505	-0.332317	0.0455938
1	C	16	YPR097W	0.0226225	0.0679725	0.0452975
2	K	2	YMR016C	-0.26628	0.356375	0.0450475
8	H	22	YDL213C	0.366268	-0.27627	0.0449988
5	D	10	YKL106W	-0.007	0.095545	0.0442725
7	O	22	YIL064W	0.167585	-0.07905	0.0442675
9	A	3	YDR016C	-0.133903	0.222383	0.04424
4	J	19	YHR159W	1.38778e-17	0.08789	0.043945
7	E	18	YHR167W	0.35156	-0.265565	0.0429975
5	A	8	YDR465C	0.0068075	0.078895	0.0428513
4	I	17	YGR004W	-0.333193	0.41839	0.0425987
10	B	22	YGL137W	0.468585	-0.383705	0.04244
8	H	20	YMR090W	-0.0140425	0.0986	0.0422787
3	E	10	YLR353W	0.142503	-0.05837	0.0420662
9	F	19	YHR059W	0.03155	0.0525125	0.0420312
4	I	3	YOL125W	0.185392	-0.10214	0.0416262
2	O	10	YNL311C	-0.13394	0.216655	0.0413575
8	K	14	YMR295C	-0.6284	0.71071	0.041155
6	J	24	YCL064C	0.034945	0.04726	0.0411025
2	M	9	YDR211W	-0.039725	0.119955	0.040115
8	B	7	YER063W	-0.195607	0.275703	0.0400475
7	M	23	YBR090C	0.234855	-0.155028	0.0399137
10	L	22	YNL287W	0.236005	-0.15627	0.0398675
8	M	5	YOL129W	0.109543	-0.0304375	0.0395525
11	M	4	YMR202W	0.178797	-0.099865	0.0394663
6	A	2	YGR031W	-0.706145	0.784745	0.0393
3	C	19	YDL106C	-0.54487	0.623445	0.0392875
1	L	3	YLR371W	-0.110082	0.18854	0.0392288
10	B	5	YOR270C	0.126075	-0.047725	0.039175
2	I	15	YMR186W	0.00282	0.0737575	0.0382888
2	B	24	YOR373W	-0.0241525	0.100655	0.0382513
7	E	6	YGR280C	-0.27502	0.35095	0.037965
8	A	20	YKR057W	0.224438	-0.148545	0.0379463
5	H	5	YNL220W	-0.0701575	0.145635	0.0377387
8	P	2	YDL115C	0.14054	-0.0652675	0.0376362
3	M	17	YGR166W	0.0700375	0.0049025	0.03747
4	J	4	YPL179W	0.062145	0.01258	0.0373625
4	M	7	YPR045C	0.015385	0.05931	0.0373475
7	J	11	YLR404W	-0.183055	0.257362	0.0371537
3	P	13	YHR114W	-0.020725	0.094765	0.03702
3	M	1	YML017W	0.109887	-0.0363175	0.036785
11	D	24	YBR290W	0.23976	-0.166242	0.0367588
7	A	4	YNL155W	-0.0960075	0.16948	0.0367362
6	L	16	YBR057C	-0.48117	0.55372	0.036275
11	K	11	YKL211C	-0.02604	0.0984675	0.0362138
8	B	22	YML106W	-0.159298	0.231653	0.0361775
8	D	17	YBR071W	0.162798	-0.0916375	0.03558
1	K	10	YJR091C	-0.019005	0.0895175	0.0352562
7	K	2	YLR271W	-0.007525	0.0778125	0.0351438
9	P	12	YMR236W	-0.125885	0.195005	0.03456
8	K	17	YHR193C	-0.170175	0.238835	0.03433
5	I	23	YDR268W	-0.010325	0.078855	0.034265
4	N	14	YMR110C	0.0974425	-0.02942	0.0340112
10	B	13	YBR080C	0.000925	0.066865	0.033895
9	N	6	YBR120C	-0.29087	0.358415	0.0337725
7	M	19	YER182W	-0.159395	0.226403	0.0335037
8	L	2	YDR447C	0.712935	-0.64597	0.0334825
3	C	15	YPR111W	0.32179	-0.2551	0.033345
5	K	20	YHR179W	0.148042	-0.0820225	0.03301
6	F	19	YOR007C	0.0706975	-0.0046875	0.033005
10	J	17	YIL005W	0.101083	-0.03566	0.0327112
10	E	6	YLR088W	-0.083045	0.148065	0.03251
8	E	5	YER042W	-0.217612	0.28254	0.0324638
2	N	10	YJL070C	-0.0710575	0.135545	0.0322438
2	H	15	YML035C	0.0689775	-0.004615	0.0321813
11	B	6	YDR245W	0.07988	-0.0155325	0.0321738
7	A	17	YGR195W	0.603017	-0.539215	0.0319012
9	C	5	YDR363W-A	0.49992	-0.436125	0.0318975
6	C	5	YCL050C	0.06283	0	0.031415
8	E	19	YDL208W	-0.0036575	0.066245	0.0312937
3	E	18	YGL252C	-0.0054775	0.068015	0.0312687
7	K	15	YDR305C	-0.135735	0.197823	0.0310438
2	D	23	YJL200C	0	0.061425	0.0307125
8	O	11	YER134C	-0.0502125	0.111568	0.0306775
2	C	9	YOL017W	-0.115265	0.17658	0.0306575
6	J	18	YJL021C	-0.40308	0.46351	0.030215
10	E	8	YDR091C	0	0.05924	0.02962
2	A	4	YLR397C	0.0764975	-0.01756	0.0294687
2	M	3	YOR156C	0.015455	0.043215	0.029335
4	H	5	YKL047W	0.087505	-0.0312	0.0281525
5	G	22	YMR201C	-0.167585	0.222815	0.027615
9	A	12	YDR079W	-0.492688	0.547582	0.0274475
11	K	23	YLR015W	0.015535	0.0369425	0.0262388
6	H	7	YBL016W	0.032745	0.0194475	0.0260963
11	D	6	YIL136W	0.13511	-0.0831175	0.0259963
3	E	8	YFL002C	-0.0109025	0.062805	0.0259512
8	H	24	YMR161W	0.934702	-0.88292	0.0258912
8	M	3	YER034W	-0.0005625	0.0514275	0.0254325
7	A	5	YNL148C	0.106353	-0.05552	0.0254163
7	J	14	YGL162W	-0.377225	0.427997	0.0253862
7	L	12	YGR044C	-0.18865	0.239035	0.0251925
7	F	20	YHR046C	0.193965	-0.144347	0.0248088
11	N	3	YJR077C	0.281755	-0.232492	0.0246312
1	I	2	YAL019W	-0.0163575	0.0639375	0.02379
9	J	12	YGR076C	0.0133775	0.0340225	0.0237
1	N	16	YGL173C	-0.31289	0.360015	0.0235625
9	J	15	YKR049C	-0.106898	0.153342	0.0232225
3	E	19	YGL244W	0.419237	-0.373575	0.0228312
9	G	20	YMR244C-A	-0.125015	0.16992	0.0224525
2	H	22	YAL041W	-0.0591825	0.10377	0.0222938
4	M	21	YOL041C	-0.608845	0.653315	0.022235
11	A	2	YJL192C	-0.111577	0.15513	0.0217762
4	O	2	YFL018C	-0.886345	0.929843	0.0217487
11	J	8	YML008C	0	0.042245	0.0211225
2	M	17	YGR266W	-0.13846	0.17962	0.02058
3	D	15	YNL293W	0.0516075	-0.01045	0.0205787
1	D	9	YLR436C	-0.003305	0.043925	0.02031
9	P	22	YER044C	-0.093655	0.13361	0.0199775
3	F	3	YBL075C	-0.002175	0.041555	0.01969
3	F	4	YBL060W	0	0.03835	0.019175
7	O	17	YBR107C	-0.05157	0.08974	0.019085
4	F	21	YLL036C	0.25555	-0.21919	0.01818
7	K	9	YJL035C	-0.079355	0.115483	0.0180638
9	H	6	YPR188C	0.04835	-0.01254	0.017905
12	H	17	YBR171W	-0.06977	0.105542	0.0178862
4	E	14	YLL011W	-0.003005	0.03847	0.0177325
7	N	4	YNL072W	-0.253825	0.289185	0.01768
2	L	4	YNL313C	-0.272365	0.306997	0.0173162
5	H	16	YDL147W	-0.0979175	0.13112	0.0166012
9	C	20	YJL144W	0.16283	-0.129635	0.0165975
11	G	24	YFR033C	-0.032415	0.0654425	0.0165138
4	P	13	YOR231W	-0.0058875	0.03828	0.0161962
7	P	11	YOR040W	-0.01428	0.046575	0.0161475
5	B	1	YBR236C	-0.224475	0.25666	0.0160925
5	I	22	YEL037C	-0.0279	0.059525	0.0158125
8	C	2	YNL310C	-0.39272	0.424343	0.0158112
4	K	9	YML102W	0.20868	-0.17755	0.015565
11	G	21	YKL072W	0.032415	-0.0017675	0.0153238
4	F	12	YMR015C	-0.18035	0.21075	0.0152
9	H	15	YJL151C	-0.07936	0.1095	0.01507
4	H	19	YGL035C	0.029405	-3.46945e-18	0.0147025
6	H	11	YHR203C	0.17312	-0.143998	0.0145612
8	D	15	YIL132C	-0.0223525	0.0512325	0.01444
2	L	2	YGL141W	0.027235	0.0015125	0.0143737
6	I	15	YKL216W	-0.018775	0.0471275	0.0141763
11	F	6	YML018C	-0.01416	0.04186	0.01385
5	G	8	YDR153C	0.21109	-0.183685	0.0137025
9	P	8	YJL011C	0.11453	-0.087285	0.0136225
4	N	8	YPL109C	-0.160403	0.18748	0.0135388
6	P	13	YPR129W	0.123128	-0.09673	0.0131988
9	C	6	YPL013C	-0.15556	0.181505	0.0129725
8	P	19	YJR133W	-0.022915	0.0486725	0.0128787
9	B	15	YMR252C	0.02815	-0.002935	0.0126075
4	K	1	YNL062C	-0.05774	0.080845	0.0115525
4	H	10	YKR016W	0.09703	-0.07402	0.011505
2	J	18	YER069W	0	0.02245	0.011225
9	O	21	YJL005W	-0.26683	0.28896	0.011065
8	F	15	YMR117C	-0.0578775	0.0796725	0.0108975
10	C	9	YBR283C	-0.387188	0.408473	0.0106425
3	N	21	YOR171C	0.01274	0.0082	0.01047
5	L	16	YOR244W	0.02078	0	0.01039
1	J	21	YHR158C	0.00375	0.0164125	0.0100812
6	O	16	YJL052W	-0.073255	0.0933125	0.0100287
2	L	9	YHR172W	-0.001	0.0210125	0.0100062
3	F	9	YDL113C	-0.042345	0.061815	0.009735
9	D	18	YMR260C	0.959353	-0.940285	0.00953375
8	G	6	YBR278W	0.559505	-0.540835	0.009335
3	P	7	YER103W	-0.093645	0.11223	0.0092925
7	L	14	YGL254W	-0.59471	0.61281	0.00905
2	C	5	YDR164C	2.77556e-17	0.018045	0.0090225
7	M	20	YNL168C	0.03685	-0.0189025	0.00897375
[truncated: 2,178 more rows]

## Sheet: MAD2 SPI Re-tests
Plate	Row	Column	ID Column	name	Mean Log Growth Ratio
2	F	4	YJL039C	NUP192	1.2
2	D	8	YKL049C	CSE4	1.17
1	A	7	YHR107C	CDC12	1.1425
1	E	9	YJL010C	NOP9	1.1375
2	A	9	YOR075W	UFE1	0.9325
2	F	10	YGL247W	BRR6	0.92
1	F	5	YBR237W	PRP5	0.905
2	E	12	YMR195W	ICY1	0.84
1	C	5	YHR036W	BRL1	0.81
1	H	8	YOR160W	MTR10	0.795
2	G	12	YBR088C	POL30	0.7775
1	D	6	YHR170W	NMD3	0.74
2	H	9	YPL209C	IPL1	0.7225
1	A	5	YDR161W	YDR161W	0.7025
1	G	6	YJR089W	BIR1	0.655
1	C	7	YNL189W	SRP1	0.6475
1	E	2	YNL308C	KRI1	0.64
2	F	12	YER104W	RTT105	0.635
1	G	5	YGR218W	CRM1	0.63
2	G	8	YKL002W	DID4	0.625
2	G	1	YKL186C	MTR2	0.6075
1	D	1	YOL144W	NOP8	0.6025
1	C	12	YGL122C	NAB2	0.5825
1	G	7	YPL242C	IQG1	0.555
1	G	3	YGR140W	CBF2	0.51
1	H	4	YLR409C	UTP21	0.5025
1	F	7	YMR001C	CDC5	0.48
2	H	7	YBR211C	AME1	0.445
2	G	2	YDL064W	UBC9	0.445
1	A	10	YLR113W	HOG1	0.44
2	E	10	YDR224C	HTB1	0.44
1	G	8	YJR132W	NMD5	0.44
1	E	8	YDR172W	SUP35	0.4025
2	C	12	YOR098C	NUP1	0.395
1	G	9	YDR069C	DOA4	0.3925
1	E	10	YGL116W	CDC20	0.3825
1	E	4	YLR399C	BDF1	0.37
2	H	12	Control	n/a	0.3675
2	G	9	YLR435W	TSR2	0.355
1	D	7	YNL317W	PFS2	0.355
1	E	3	YJL069C	UTP18	0.355
2	A	2	BLANK	n/a	0.35
1	G	12	YER013W	PRP22	0.34
1	G	2	YDR443C	SSN2	0.34
2	C	1	YPL125W	KAP120	0.33
1	H	7	YGL197W	MDS3	0.33
1	G	1	YIL130W	ASG1	0.3175
1	E	1	YJL013C	MAD3	0.3125
1	A	8	YHR129C	ARP1	0.3075
1	F	11	YPL029W	SUV3	0.3075
1	C	2	YIR012W	SQT1	0.2975
1	F	1	YPL104W	MSD1	0.295
1	A	3	YIL019W	FAF1	0.29
1	H	2	YDR507C	GIN4	0.29
1	D	3	YOL123W	HRP1	0.285
1	H	3	YPL183C	RTT10	0.285
1	H	1	YMR280C	CAT8	0.2825
1	A	12	YOR173W	DCS2	0.28
1	B	6	YOL069W	NUF2	0.2775
1	D	11	YER054C	GIP2	0.2775
1	A	1	YBR161W	CSH1	0.2575
1	H	11	YMR190C	SGS1	0.2525
1	E	12	YIL056W	VHR1	0.25
2	G	5	YBR193C	MED8	0.2375
1	F	6	YBL097W	BRN1	0.2375
2	A	3	BLANK	n/a	0.235
2	F	6	YHR089C	GAR1	0.2325
2	A	8	YGL054C	ERV14	0.2275
2	H	5	YOL010W	RCL1	0.2275
1	B	10	YDR532C	KRE28	0.2275
1	H	5	YPL009C	TAE2	0.2225
1	H	10	YNR031C	SSK2	0.2225
1	B	4	YGR122W	YGR122W	0.2175
2	D	11	YOL012C	HTZ1	0.2175
1	B	12	YOR063W	RPL3	0.2125
1	A	4	YGR159C	NSR1	0.21
2	A	12	YBR070C	ALG14	0.2025
1	G	10	YGR270W	YTA7	0.2025
2	F	7	YLR370C	ARC18	0.2025
1	F	8	YDR499W	LCD1	0.2025
2	E	8	YIR009W	MSL1	0.2
2	H	11	YML021C	UNG1	0.1975
1	D	2	YMR115W	MGR3	0.195
1	F	3	YGL180W	ATG1	0.1925
1	B	11	YNL136W	EAF7	0.1875
1	A	9	YNL175C	NOP13	0.1875
2	G	7	YHR038W	RRF1	0.1875
2	A	10	YHR012W	VPS29	0.1875
1	C	1	YDR364C	CDC40	0.1825
2	B	6	YNL180C	RHO5	0.1825
2	F	8	YER148W	SPT15	0.18
2	A	11	YML125C	PGA3	0.1775
2	A	4	BLANK	n/a	0.175
1	D	4	YKR063C	LAS1	0.17
2	E	9	YOL052C-A	DDR2	0.16
1	H	9	YFL033C	RIM15	0.1525
1	D	10	YLR392C	ART10	0.1475
2	B	12	YEL031W	SPF1	0.1475
2	F	3	YIL062C	ARC15	0.145
1	D	8	YDR190C	RVB1	0.1275
1	B	5	YPR140W	TAZ1	0.1275
2	B	7	YCR028C	FEN2	0.125
1	C	4	YNL166C	BNI5	0.1225
2	C	11	YLR083C	EMP70	0.1225
1	B	9	YKL149C	DBR1	0.1225
2	B	4	YPR124W	CTR1	0.1175
1	B	2	YER043C	SAH1	0.1175
2	H	1	YDR075W	PPH3	0.115
2	A	5	YMR024W	MRPL3	0.1125
1	C	10	Control	n/a	0.1125
1	B	3	YOR025W	HST3	0.11
2	D	3	YMR129W	POM152	0.105
1	E	11	YIL046W	MET30	0.1
1	A	11	YIL116W	HIS5	0.0975
2	D	10	YPL037C	EGD1	0.0925
2	A	7	YOR260W	GCD1	0.0925
2	B	5	YLL023C	POM33	0.0925
1	F	4	YDR385W	EFT2	0.09
1	C	8	YDR219C	MFB1	0.085
2	B	9	YGR065C	VHT1	0.085
2	C	7	YPL221W	FLC1	0.075
1	A	2	YGL157W	ARI1	0.075
2	B	10	YBR003W	COQ1	0.0725
1	F	10	YLL008W	DRS1	0.07
1	G	11	Control	n/a	0.07
1	H	6	Control	n/a	0.07
2	C	9	YMR058W	FET3	0.065
2	F	11	YPL233W	NSL1	0.0625
2	D	6	YGL233W	SEC15	0.0625
2	D	5	Control	n/a	0.06
2	G	4	Control	n/a	0.055
1	E	5	YLR299W	ECM38	0.055
2	C	4	YLR373C	VID22	0.0525
2	D	4	YNL279W	PRM1	0.05
1	C	11	YGL065C	ALG2	0.05
1	H	12	Control	n/a	0.0475
2	C	5	YDR135C	YCF1	0.045
2	C	3	Control	n/a	0.045
2	E	1	YGL080W	FMP37	0.045
2	H	10	YKL060C	FBA1	0.0425
2	B	3	YNL247W	YNL247W	0.0425
2	G	11	Control	n/a	0.04
1	G	4	Control	n/a	0.0375
2	D	2	YFL026W	STE2	0.035
2	C	2	YNL283C	WSC2	0.0325
2	E	3	YGR219W	YGR219W	0.03
2	B	11	YIL030C	SSM4	0.03
2	F	2	Control	n/a	0.03
2	B	1	Control	n/a	0.025
2	C	6	YGL077C	HNM1	0.025
2	E	4	YNL198C	YNL198C	0.025
2	H	3	Control	n/a	0.0225
1	C	3	Control	n/a	0.02
2	E	7	Control	n/a	0.0175
2	E	2	YJL169W	YJL169W	0.0175
2	H	6	Control	n/a	0.0175
1	F	2	Control	n/a	0.0175
2	C	8	YLL043W	FPS1	0.01
1	B	1	Control	n/a	0.005
2	B	2	Control	n/a	0.005
2	G	3	YHR189W	PTH1	0
1	B	8	Control	n/a	-0.0025
1	F	9	Control	n/a	-0.005
2	E	11	YNL281W	HCH1	-0.005
2	D	7	YDR357C	CNL1	-0.0075
1	B	7	YOL022C	TSR4	-0.01
2	D	12	Control	n/a	-0.0125
2	G	10	Control	n/a	-0.015
2	F	9	Control	n/a	-0.0175
1	E	6	YOR372C	NDD1	-0.02
1	D	9	YMR093W	UTP15	-0.0225
1	D	12	Control	n/a	-0.0275
1	F	12	Control	n/a	-0.0275
1	C	6	YPL247C	YPL247C	-0.0325
2	D	9	YDR344C	YDR344C	-0.035
2	E	5	YPR062W	FCY1	-0.035
2	E	6	YJR082C	EAF6	-0.0375
2	G	6	YPL051W	ARL3	-0.0475
2	F	1	YOR167C	RPS28A	-0.0525
2	B	8	Control	n/a	-0.055
1	A	6	Control	n/a	-0.0725
2	D	1	YNL243W	SLA2	-0.0825
1	C	9	YCL043C	PDI1	-0.0925
1	D	5	Control	n/a	-0.095
1	E	7	Control	n/a	-0.095
2	H	2	YJL180C	ATP12	-0.0975
2	H	4	YML004C	GLO1	-0.1025
2	C	10	Control	n/a	-0.105
2	A	6	Control	n/a	-0.105
2	H	8	YDR035W	ARO3	-0.13
2	F	5	YJR104C	SOD1	-0.145
