# Supplementary material for: Synthetic Physical Interactions Map Kinetochore-Checkpoint Activation Regions
Source: G3 (Bethesda). 2016 Jun 8;6(8):2531–42. doi: 10.1534/g3.116.031930 (PMC4978906; doi:10.1534/g3.116.031930)
Supplement: Supplemental Material [file supp_g3.116.031930_FileS2.xlsx]

## Sheet: GBP & MAD2 controls
ORF	Gene Name	GBP control Log Growth Ratio	MAD2 control Log Growth Ratio	Mean Log Growth Ratio
YKL049C	CSE4	0.94543	0.99571	0.97057
YPL209C	IPL1	0.4951	0.61289	0.553995
YBR156C	SLI15	0.26876	0.55228	0.41052
YJR089W	BIR1	0.24432	0.50216	0.37324
YBR211C	AME1	0.20554	0.50191	0.353725
YMR001C	CDC5	0.13361	0.46779	0.3007
YGR179C	OKP1	0.15263	0.40207	0.27735
YMR117C	SPC24	0.07286	0.32997	0.201415
YPL233W	NSL1	0.09827	0.27257	0.18542
YLR045C	STU2	0.05173	0.31671	0.18422
YOL069W	NUF2	0.01025	0.35445	0.18235
YIL106W	MOB1	-0.02826	0.37639	0.174065
YDR320C-A	DAD4	0.10539	0.24171	0.17355
YDL088C	ASM4	0.03281	0.29967	0.16624
YDR318W	MCM21	-0.03139	0.34997	0.15929
YPL018W	CTF19	0.00543	0.30581	0.15562
YDL134C	PPH21	-0.09018	0.40103	0.155425
YLR315W	NKP2	0.07092	0.23793	0.154425
Control	n/a	0.13639	0.16746	0.151925
YKR037C	SPC34	0.02251	0.2656	0.144055
YGR140W	CBF2	0.09302	0.18958	0.1413
YDR532C	KRE28	-0.02116	0.29476	0.1368
YFR028C	CDC14	-0.08657	0.35989	0.13666
YMR168C	CEP3	-0.02864	0.29901	0.135185
YBL079W	NUP170	0.01456	0.24642	0.13049
YIL144W	TID3	-0.03726	0.28642	0.12458
YPL269W	KAR9	-0.04197	0.26961	0.11382
YOR026W	BUB3	-0.05211	0.27277	0.11033
YJR112W	NNF1	-0.05442	0.26317	0.104375
YPR046W	MCM16	-0.04836	0.25692	0.10428
YER105C	NUP157	-0.04601	0.25069	0.10234
YDR328C	SKP1	0.04605	0.14167	0.09386
YER018C	SPC25	-0.02828	0.20557	0.088645
YOR057W	SGT1	-0.1263	0.29443	0.084065
YLR212C	TUB4	-0.08059	0.24861	0.08401
YKL042W	SPC42	-0.13998	0.302	0.08101
YDR439W	LRS4	-0.03488	0.19561	0.080365
YJR135C	MCM22	-0.07053	0.2291	0.079285
YDL188C	PPH22	-0.12915	0.28689	0.07887
YGL061C	DUO1	-0.05587	0.21027	0.0772
YNL164C	IBD2	-0.06474	0.21436	0.07481
YBR009C	HHF1	-0.05359	0.19916	0.072785
YOR269W	PAC1	-0.04324	0.18847	0.072615
YER016W	BIM1	-0.08525	0.22328	0.069015
YAL034W-A	MTW1	-0.07661	0.20182	0.062605
YJR060W	CBF1	-0.10872	0.22741	0.059345
YKR083C	DAD2	-0.09083	0.20946	0.059315
YBR107C	IML3	-0.01864	0.13532	0.05834
YKL052C	ASK1	0.04416	0.07237	0.058265
Control	n/a	0.01553	0.0988	0.057165
YMR153W	NUP53	-0.07742	0.18952	0.05605
Control	n/a	0.01256	0.09664	0.0546
YGL216W	KIP3	-0.11575	0.22405	0.05415
YCR086W	CSM1	-0.10547	0.21265	0.05359
YDR201W	SPC19	-0.03026	0.13449	0.052115
YCL029C	BIK1	-0.09256	0.19215	0.049795
YBR233W-A	DAD3	0.04383	0.05471	0.04927
YGL086W	MAD1	-0.08555	0.17478	0.044615
YDR254W	CHL4	-0.04948	0.13741	0.043965
YJL030W	MAD2	-0.14272	0.22615	0.041715
YDR424C	DYN2	-0.04284	0.12392	0.04054
YDR225W	HTA1	-0.05287	0.1335	0.040315
YJL013C	MAD3	-0.12764	0.20677	0.039565
YAL016W	TPD3	-0.09713	0.1732	0.038035
YDR224C	HTB1	-0.10375	0.17511	0.03568
YBR010W	HHT1	-0.06851	0.13765	0.03457
YLR381W	CTF3	-0.12268	0.18884	0.03308
YHR172W	SPC97	-0.09839	0.16233	0.03197
YDR016C	DAD1	-0.05772	0.12125	0.031765
YFR046C	CNN1	-0.11449	0.17611	0.03081
YPR141C	KAR3	-0.14035	0.19824	0.028945
YIR010W	DSN1	-0.11576	0.17178	0.02801
Control	n/a	-0.00717	0.06179	0.02731
YGL060W	YBP2	-0.11142	0.16405	0.026315
YNL031C	HHT2	-0.30093	0.33027	0.01467
YER133W	GLC7	-0.09343	0.11405	0.01031
YGR188C	BUB1	-0.07407	0.09275	0.00934
Control	n/a	-0.01155	0.0294	0.008925
YBL002W	HTB2	-0.15938	0.16847	0.004545
YKR054C	DYN1	-0.10762	0.11244	0.00241
YBL003C	HTA2	-0.12354	0.12305	-0.000245
YPL155C	KIP2	-0.14355	0.14085	-0.00135
YHR102W	KIC1	-0.14781	0.13775	-0.00503
YDL028C	MPS1	-0.14204	0.12614	-0.00795
YOR073W	SGO1	-0.16486	0.07883	-0.043015
YIL031W	ULP2	-0.12859	0.03403	-0.04728
YBL034C	STU1	-0.24573	0.12434	-0.060695
YBL063W	KIP1	-0.15456	0.02389	-0.065335
YOR195W	SLK19	-0.16981	0.01358	-0.078115
YGL093W	SPC105	-0.15409	-0.00943	-0.08176
Control	n/a	-0.03566	-0.16102	-0.09834
Control	n/a	-0.05596	-0.17322	-0.11459
YNL126W	SPC98	-0.14863	-0.08472	-0.116675
YKL089W	MIF2	-0.11686	-0.12974	-0.1233
YEL061C	CIN8	-0.20771	-0.06376	-0.135735
YGL116W	CDC20	n/a	n/a	n/a

## Sheet: mad2-RQ-AA-GBP control
ORF	Gene Name	Mean Log Growth Ratio
YKL049C	CSE4	0.644865
YPL209C	IPL1	0.56313
YBR156C	SLI15	0.320875
YJR089W	BIR1	0.265765
YGL116W	CDC20	0.24448
YBR211C	AME1	0.223445
YLR315W	NKP2	0.19725
YGR140W	CBF2	0.172845
YER133W	GLC7	0.160855
YNL126W	SPC98	0.147195
YGL061C	DUO1	0.13515
YGR179C	OKP1	0.13179
YJR112W	NNF1	0.11675
YOL069W	NUF2	0.10834
YPL018W	CTF19	0.101485
YFR046C	CNN1	0.093405
YBR107C	IML3	0.087795
YMR001C	CDC5	0.084165
YMR117C	SPC24	0.078475
YKR037C	SPC34	0.07737
YNL164C	IBD2	0.074325
YDR225W	HTA1	0.0727
Control	n/a	0.052355
YBR009C	HHF1	0.050245
YDR532C	KRE28	0.046715
YJL013C	MAD3	0.046395
YOR269W	PAC1	0.04592
YDL188C	PPH22	0.04567
YDR318W	MCM21	0.03552
YLR045C	STU2	0.03514
YCR086W	CSM1	0.035045
Control	n/a	0.033495
YIL144W	NDC80	0.033455
YDR224C	HTB1	0.02559
YHR172W	SPC97	0.020795
YPR141C	KAR3	0.01914
YBR233W-A	DAD3	0.017145
YDR439W	LRS4	0.01626
YJL030W	MAD2	0.015915
YGR188C	BUB1	0.011885
YLR212C	TUB4	0.01184
YDR424C	DYN2	0.011285
YLR381W	CTF3	0.01122
YDL028C	MPS1	0.008455
YBL079W	NUP170	0.00836
Control	n/a	0.00729
Control	n/a	0.00601
YKR054C	DYN1	0.0044
YOR057W	SGT1	0.002845
YAL016W	TPD3	-0.00025
Control	n/a	-0.000945
YDR254W	CHL4	-0.001395
Control	n/a	-0.00187
YIR010W	DSN1	-0.003735
YMR153W	NUP53	-0.004275
YER016W	BIM1	-0.005555
YER018C	SPC25	-0.00787
YDR328C	SKP1	-0.00824
YNL031C	HHT2	-0.00924
YDR201W	SPC19	-0.009255
YDL088C	ASM4	-0.01273
YIL031W	ULP2	-0.017645
YDL134C	PPH21	-0.01825
YJR135C	MCM22	-0.018265
Control	n/a	-0.01875
YOR073W	SGO1	-0.019495
YBR010W	HHT1	-0.02189
YOR026W	BUB3	-0.02223
YCL029C	BIK1	-0.023685
YGL216W	KIP3	-0.025905
YBL063W	KIP1	-0.02715
YPL233W	NSL1	-0.02918
YER105C	NUP157	-0.03139
YBL003C	HTA2	-0.03263
YGL093W	SPC105	-0.035215
YEL061C	CIN8	-0.03522
YDR320C-A	DAD4	-0.03946
YAL034W-A	MTW1	-0.03977
YPR046W	MCM16	-0.041335
YGL060W	YBP2	-0.042355
YJR060W	CBF1	-0.04476
YOR195W	SLK19	-0.04759
YFR028C	CDC14	-0.049125
YIL106W	MOB1	-0.049875
YHR102W	KIC1	-0.054785
YKR083C	DAD2	-0.05957
Control	n/a	-0.064615
YBL002W	HTB2	-0.065075
YMR168C	CEP3	-0.068755
YBL034C	STU1	-0.072685
YPL269W	KAR9	-0.073695
YKL089W	MIF2	-0.07961
YPL155C	KIP2	-0.082675
YGL086W	MAD1	-0.092345
YKL042W	SPC42	-0.092895
YDR016C	DAD1	-0.12757

## Sheet: mad2∆C-GBP control
ORF	Gene Name	Mean Log Growth Ratio
YKL049C	CSE4	1.2651
YGL116W	CDC20	1.07824
YPL209C	IPL1	0.93015
YBR156C	SLI15	0.54563
YJR089W	BIR1	0.5383
YBR211C	AME1	0.450935
YGL061C	DUO1	0.40419
YGR179C	OKP1	0.3959
YLR315W	NKP2	0.378195
YMR001C	CDC5	0.338905
YPL018W	CTF19	0.326135
YKR037C	SPC34	0.287605
YGR140W	CBF2	0.28321
YJR112W	NNF1	0.23831
YDR318W	MCM21	0.222295
YDR224C	HTB1	0.2143
YOL069W	NUF2	0.211355
YMR168C	CEP3	0.208105
YDL134C	PPH21	0.19938
YBR009C	HHF1	0.15978
YKL042W	SPC42	0.151605
YER133W	GLC7	0.15033
YNL126W	SPC98	0.14745
YDL188C	PPH22	0.140685
YBR233W-A	DAD3	0.12356
YIL144W	NDC80	0.10214
YHR102W	KIC1	0.101285
YAL016W	TPD3	0.099055
YBR107C	IML3	0.08746
YBL079W	NUP170	0.08197
YDR532C	KRE28	0.08064
YNL031C	HHT2	0.07818
YDR439W	LRS4	0.07576
YLR045C	STU2	0.07571
YFR046C	CNN1	0.07143
YJR135C	MCM22	0.067375
YOR057W	SGT1	0.064835
YPR046W	MCM16	0.063335
YBL063W	KIP1	0.06247
Control	n/a	0.06085
YNL164C	IBD2	0.059065
YMR153W	NUP53	0.056575
YCR086W	CSM1	0.05602
YDR201W	SPC19	0.046635
YJL030W	MAD2	0.044435
Control	n/a	0.04219
YFR028C	CDC14	0.040495
YDR424C	DYN2	0.03987
Control	n/a	0.036595
YJL013C	MAD3	0.03574
YBR010W	HHT1	0.03514
YHR172W	SPC97	0.030705
YGR188C	BUB1	0.0301
YOR269W	PAC1	0.024005
YIR010W	DSN1	0.01913
YMR117C	SPC24	0.015075
YBL034C	STU1	0.009935
YOR195W	SLK19	0.006685
YEL061C	CIN8	0.006565
YER018C	SPC25	0.002655
YIL106W	MOB1	0.002405
YPL269W	KAR9	-0.000925
YPL233W	NSL1	-0.003195
YPL155C	KIP2	-0.009405
YGL216W	KIP3	-0.00975
Control	n/a	-0.01032
YDL028C	MPS1	-0.011085
YOR026W	BUB3	-0.01171
YGL093W	SPC105	-0.01481
YPR141C	KAR3	-0.016275
YCL029C	BIK1	-0.01652
YKR054C	DYN1	-0.016885
YOR073W	SGO1	-0.018
YLR381W	CTF3	-0.021225
YER105C	NUP157	-0.02339
Control	n/a	-0.02366
YGL060W	YBP2	-0.02412
Control	n/a	-0.02622
YDR225W	HTA1	-0.02651
YIL031W	ULP2	-0.02996
YBL002W	HTB2	-0.033165
YDL088C	ASM4	-0.03663
YDR320C-A	DAD4	-0.03712
YDR254W	CHL4	-0.04442
YKR083C	DAD2	-0.055425
YLR212C	TUB4	-0.055465
Control	n/a	-0.05917
Control	n/a	-0.05964
YER016W	BIM1	-0.060425
YDR016C	DAD1	-0.065515
YBL003C	HTA2	-0.068945
YJR060W	CBF1	-0.0718
YAL034W-A	MTW1	-0.09574
YDR328C	SKP1	-0.099865
YGL086W	MAD1	-0.10733
YKL089W	MIF2	-0.765405

## Sheet: All Mad2-GBP mutants vs GBP
gene	WT Mad2-GBP pHT36	mad2∆C pHT383	C-Mad2 pHT405	O-Mad2 doesn't bind C-Mad2 pHT406	mad2 doesn't bind O-or C-Mad2 pHT407
CSE4	1.80056	0.47019	1.64051	0.63773	1.16905
CDC20	1.72168	-0.14572	1.5759	0.32226	1.39115
IPL1	0.7848	-0.15063	0.36098	-0.0408	-0.01079
AME1	0.48292	0.08245	0.13458	0.04374	0.02499
BIR1	0.40211	0.02259	0.08013	0.21992	0.32722
MCM21	0.30548	0.05429	0.13706	0.12889	0.11576
NDC10	0.30179	0.11628	0.23454	0.17714	0.27632
SLI15	0.29065	0.02365	0.41937	0.1378	0.02888
SPC34	0.26559	0.05202	-0.02673	-0.01984	-0.09069
OKP1	0.26447	-0.10863	0.07681	0.05735	-0.10738
PPH21	0.24219	-0.02732	0.19606	0.15513	0.09933
NNF1	0.18171	0.12248	0.07182	0.08329	0.09451
SPC24	0.18138	0.0982	0.33936	0.17091	0.12947
TPD3	0.17118	-0.01945	-0.00896	0.07655	0.07237
STU2	0.16971	0.0772	0.20025	0.17703	0.14083
CEP3	0.16899	-0.05992	0.02421	0.05362	0.10688
NDC80	0.16866	0.09505	0.10104	0.16066	0.14645
MAD2	0.16195	0.0845	0.02823	0.03598	0.07428
CDC5	0.15529	-0.08451	0.02888	0.12142	0.06143
ASM4	0.14914	0.071	0.21297	0.14208	0.16882
MCM16	0.14874	0.0333	0.07793	0.06909	0.07615
DSN1	0.14244	0.05601	0.0635	0.14686	0.13954
MOB1	0.13879	0.12061	0.28076	0.20694	0.19654
SPC25	0.13319	0.07929	-0.01485	-0.07294	-0.0214
BUB3	0.13303	0.09593	0.02074	0.02492	0.01825
NUP170	0.13093	0.08545	0.14858	0.12578	0.12447
NUP157	0.12759	0.09441	0.16614	0.13261	0.13811
n/a	0.12573	0.11528	0.17849	0.20594	0.14529
GLC7	0.12391	0.1204	-0.00414	0.08459	0.09455
PPH22	0.11977	-0.04602	0.01904	0.01235	-0.02835
BUB1	0.11926	0.01085	0.11739	0.08328	0.08897
NUF2	0.11871	0.02137	0.08753	-0.00787	0.02558
IML3	0.11861	0.04359	0.06598	0.09714	0.1356
CNN1	0.11861	0.12187	0.04929	0.11271	0.11774
MCM22	0.11701	-0.00449	0.05546	0.0266	0.05447
KRE28	0.1165	0.01278	0.02722	0.00256	0.00378
TUB4	0.11069	0.07144	0.10576	0.08638	0.06672
CSM1	0.10619	0.08068	0.05219	0.03442	0.07542
CTF3	0.10218	-0.00198	0.03018	0.06386	0.13944
NUP53	0.1013	0.03805	0.11493	0.10415	0.12261
PAC1	0.10002	0.02868	0.01322	-0.03017	0.03539
MTW1	0.09743	0.27866	0.04461	0.03693	0.05174
DYN1	0.09697	0.08749	0.15612	0.13878	0.06784
HTB1	0.09462	-0.11226	0.27305	-0.05608	-0.15132
CBF1	0.08359	0.06634	0.12616	0.12164	0.14161
KIC1	0.0813	-0.02738	0.06248	0.14385	0.1287
HHT1	0.07957	-0.01394	0.12612	0.10809	0.10664
BIK1	0.07584	0.03704	0.01302	-0.05674	-0.00455
MIF2	0.0752	0.59778	0.23643	0.14246	0.10619
CTF19	0.07387	-0.09543	0.11014	0.01167	-0.00296
DAD2	0.0731	0.10831	-0.02168	0.00075	-0.00593
SLK19	0.07295	-0.0232	0.06606	0.03839	0.09353
SPC97	0.07282	0.03211	0.04575	0.09864	0.03358
KIP1	0.07147	-0.03393	0.05558	0.10703	0.08328
KAR9	0.06805	-0.02115	0.01155	0.02062	0.0134
SPC105	0.06785	-0.0734	0.03258	0.01327	0.09717
SGT1	0.06681	-0.08016	-0.03874	0.01463	-0.08822
KIP3	0.06644	0.04335	0.09417	0.0853	0.07042
CHL4	0.06224	-0.00062	0.02262	0.04437	0.01033
LRS4	0.05772	0.00159	0.04379	0.04807	0.03557
HTB2	0.05747	0.05696	0.11168	0.08204	0.07865
n/a	0.05515	0.00547	-0.01044	0.01005	-0.00527
CDC14	0.05494	-0.05112	0.04084	0.04705	0.02777
MAD3	0.05285	0.00761	-0.00729	-0.00621	-0.047
SPC42	0.05218	-0.05843	0.03946	0.38364	0.23821
NKP2	0.04945	-0.09581	0.02351	-0.0011	0.01948
SPC19	0.04089	0.00421	0.06134	0.03145	0.09518
KIP2	0.04007	-0.01649	0.04676	0.07136	0.01533
n/a	0.04005	-0.04358	0.0087	-0.01126	0.07563
HTA2	0.03911	0.01132	-0.03739	-0.05668	-0.02458
CIN8	0.0366	-0.0434	0.1033	0.0706	0.04374
IBD2	0.03295	0.0917	0.06715	0.00371	0.02538
n/a	0.03152	-0.00282	-7e-05	0.01083	-0.0174
ULP2	0.02914	0.00302	0.04758	0.08044	0.06378
BIM1	0.02557	-7e-05	0.09959	0.11124	0.06047
YBP2	0.02504	0.00255	-0.01052	-0.0168	0.01248
KAR3	0.02462	0.06372	0.0339	0.05028	0.04399
n/a	0.01952	0.07168	-0.02085	-0.03729	-0.02581
SGO1	0.01068	-0.10975	-0.00241	0.03389	0.00478
n/a	0.00144	0.02369	0.00848	-0.02457	-0.01213
HHT2	-0.0005	0.05299	0.16131	-0.0152	0.05558
DAD1	-0.00437	0.00963	0.03611	0.052	0.02956
MAD1	-0.00446	0.02213	0.00396	0.11203	0.03389
n/a	-0.00493	0.01563	-0.01144	-0.01452	0.01111
n/a	-0.00494	-0.01937	0.00588	0.01414	-0.06028
HHF1	-0.00525	-0.02565	0.09381	0.09704	0.10487
DAD3	-0.0105	0.03546	0.00807	-0.0871	-0.1188
HTA1	-0.0178	0.02701	-0.05767	0.0034	-0.01631
STU1	-0.02919	-0.03661	0.05388	0.02109	-0.07419
MPS1	-0.0381	-0.00203	0.03033	0.0568	0.01997
NSL1	-0.04473	-0.0784	-0.00173	-0.02231	-0.07818
DYN2	-0.10266	-0.15867	-0.0837	-0.10413	-0.07811
SKP1	-0.10651	-0.02679	-0.07445	-0.08737	-0.05131
DAD4	-0.18065	-0.13656	-0.14084	-0.16172	-0.13126

## Sheet: mad3∆ data
	mad2-RQ/AA-GBP control Log Grotwh Ratio				mad2∆C-GBP control Log Growth Ratio
GFP strain	WT	mad3∆		GFP strain	WT	mad3∆
Ipl1	0.46626	0.00584		Cdc20	1.28411	1.522
Sli15	0.19732	0.0457		Ipl1	0.50238	0.07159
Ame1	0.05178	0.04928		Sli15	0.21397	0.01343
Ctf19	0.00768	-0.10222		Bir1	0.21349	-0.13022
Bir1	-0.0257	-0.13925		Cep3	0.07329	-0.17742
Stu2	-0.08837	-0.14003		Ame1	0.05806	0.0416
Ndc10	-0.11291	-0.10107		Ctf19	-0.04503	-0.07304
Kre28	-0.11331	-0.07958		Nnf1	-0.053	-0.08736
Dsn1	-0.11528	-0.10778		Nuf2	-0.05438	-0.07651
Mcm21	-0.11948	-0.08338		Mcm21	-0.07864	-0.0199
Cep3	-0.13497	-0.19386		Ndc10	-0.0833	-0.32119
Nuf2	-0.14075	-0.12111		Stu2	-0.11134	-0.15415
Dad3	-0.14276	-0.08148		Kre28	-0.11606	-0.08828
Bub3	-0.14415	-0.13748		Cdc14	-0.1322	-0.11748
Nnf1	-0.16362	-0.09154		Dsn1	-0.16178	-0.12608
Cdc14	-0.17232	-0.17576		Bub3	-0.20385	-0.21128
Cbf1	-0.18363	-0.17415		Nsl1	-0.21283	-0.17296
Nsl1	-0.18835	-0.19604		Cbf1	-0.22599	-0.19018
Mtw1	-0.205	-0.1406		Dad3	-0.26068	0.05922
Bik1	-0.21956	-0.1785		Bik1	-0.2648	-0.24499
Mif2	-0.26549	-0.21921		Mtw1	-0.4124	-0.35842
Cdc20	n/a	n/a		Mif2	-0.80225	-0.71705
Cse4	n/a	n/a		Cse4	n/a	n/a
