# Supplementary material for: Synthetic Physical Interactions Map Kinetochore-Checkpoint Activation Regions
Source: G3 (Bethesda). 2016 Jun 8;6(8):2531–42. doi: 10.1534/g3.116.031930 (PMC4978906; doi:10.1534/g3.116.031930)
Supplement: Supplemental Material [file supp_g3.116.031930_FileS3.xlsx]

## Sheet: GBP & MAD1 controls
ORF	Gene Name	GBP control Log Growth Ratio	MAD1 control Log Growth Ratio	Mean Log Growth Ratio
YKL049C	CSE4	1.3361	1.15416	1.24513
YGR140W	NDC10	1.35426	1.12859	1.24143
YMR168C	CEP3	0.79186	0.81322	0.80254
YKL042W	SPC42	0.59043	0.78567	0.68805
YKL089W	MIF2	0.80507	0.28054	0.542805
YPL209C	IPL1	0.39769	0.51492	0.456305
YGL116W	CDC20	0.57143	0.23474	0.403085
YHR102W	KIC1	0.24606	0.3725	0.30928
YDR318W	MCM21	0.27192	0.2635	0.26771
YBR233W-A	DAD3	0.21278	0.3151	0.26394
YJR089W	BIR1	0.22554	0.28485	0.255195
YBR156C	SLI15	0.16975	0.33251	0.25113
YAL034W-A	MTW1	0.20718	0.19916	0.20317
YGR188C	BUB1	0.18487	0.21285	0.19886
YER016W	BIM1	0.10083	0.18882	0.144825
YGR179C	OKP1	0.16762	0.11408	0.14085
YCL029C	BIK1	0.11965	0.15852	0.139085
YBR211C	AME1	0.10752	0.14932	0.12842
YBR010W	HHT1	0.16642	0.03686	0.10164
YPL018W	CTF19	0.09301	0.10832	0.100665
YBR107C	IML3	0.13891	0.05607	0.09749
YPR046W	MCM16	0.11891	0.07363	0.09627
YHR172W	SPC97	0.05317	0.13229	0.09273
YJL030W	MAD2	0.02003	0.15993	0.08998
YPL269W	KAR9	0.07805	0.0964	0.087225
YOL069W	NUF2	0.04409	0.12377	0.08393
YDL134C	PPH21	0.05523	0.11134	0.083285
YDR016C	DAD1	0.10889	0.04869	0.07879
YJR135C	MCM22	0.09044	0.05394	0.07219
YDR328C	SKP1	0.06374	0.07994	0.07184
YOR057W	SGT1	0.05258	0.08649	0.069535
YFR046C	CNN1	0.06249	0.07258	0.067535
YOR026W	BUB3	0.0049	0.13004	0.06747
YDR424C	DYN2	0.08588	0.04698	0.06643
YPR141C	KAR3	0.01545	0.11694	0.066195
YOR269W	PAC1	0.01732	0.11302	0.06517
YAL016W	TPD3	0.08744	0.03705	0.062245
YER018C	SPC25	0.01955	0.10487	0.06221
YLR315W	NKP2	0.10572	0.01379	0.059755
YCR086W	CSM1	0.02307	0.09418	0.058625
YJR112W	NNF1	0.01778	0.09642	0.0571
YPL233W	NSL1	0.06938	0.03382	0.0516
YDR224C	HTB1	0.03477	0.06371	0.04924
YDL188C	PPH22	0.01771	0.08075	0.04923
YMR001C	CDC5	0.00166	0.09403	0.047845
YGL216W	KIP3	0.04535	0.04921	0.04728
YLR381W	CTF3	0.0857	0.00754	0.04662
YDR201W	SPC19	0.07675	0.01114	0.043945
YER105C	NUP157	0.01078	0.07358	0.04218
YDL088C	ASM4	-0.01291	0.09352	0.040305
Control	n/a	0.0234	0.05118	0.03729
YER133W	GLC7	-0.0413	0.10943	0.034065
YBL079W	NUP170	0.00057	0.06506	0.032815
YFR028C	CDC14	-0.00835	0.07146	0.031555
YDR532C	KRE28	0.0091	0.05362	0.03136
Control	n/a	0.0357	0.02462	0.03016
YKR037C	SPC34	0.01882	0.03826	0.02854
Control	n/a	0.0326	0.01857	0.025585
Control	n/a	0.01149	0.03515	0.02332
YGL086W	MAD1	-0.03389	0.07394	0.020025
Control	n/a	0.00339	0.02997	0.01668
YDR320C-A	DAD4	-0.00042	0.0307	0.01514
YGL060W	YBP2	-0.02229	0.05246	0.015085
YOR073W	SGO1	0.00484	0.02357	0.014205
YIL144W	NDC80	-0.01604	0.03954	0.01175
YMR153W	NUP53	0.02547	-0.00213	0.01167
YDR439W	LRS4	0.06592	-0.05051	0.007705
YBR009C	HHF1	-0.01383	0.02797	0.00707
YMR117C	SPC24	-0.00594	0.01534	0.0047
YBL002W	HTB2	-0.02814	0.02079	-0.003675
YDR254W	CHL4	0.10893	-0.11724	-0.004155
YNL031C	HHT2	-0.00986	0.00124	-0.00431
YIL106W	MOB1	-0.05563	0.03417	-0.01073
YKR083C	DAD2	-0.01034	-0.01419	-0.012265
Control	n/a	-0.01165	-0.01314	-0.012395
YIL031W	ULP2	0.01718	-0.04199	-0.012405
YDR225W	HTA1	0.06578	-0.09097	-0.012595
YPL155C	KIP2	0.04383	-0.06946	-0.012815
YBL003C	HTA2	-0.05953	0.03324	-0.013145
YDL028C	MPS1	-0.04991	0.02078	-0.014565
Control	n/a	-0.01199	-0.04404	-0.028015
YJR060W	CBF1	-0.0244	-0.03342	-0.02891
YIR010W	DSN1	-0.01966	-0.04002	-0.02984
YBL063W	KIP1	-0.02791	-0.03703	-0.03247
YNL164C	IBD2	-0.05297	-0.02776	-0.040365
YKR054C	DYN1	-0.04676	-0.0489	-0.04783
YLR212C	TUB4	-0.05172	-0.06329	-0.057505
YEL061C	CIN8	-0.04568	-0.08137	-0.063525
YJL013C	MAD3	-0.11365	-0.04602	-0.079835
Control	n/a	-0.02864	-0.14894	-0.08879
YOR195W	SLK19	-0.13881	-0.05939	-0.0991
YBL034C	STU1	-0.14279	-0.10068	-0.121735
YGL093W	SPC105	-0.07872	-0.16661	-0.122665
YLR045C	STU2	-0.13399	-0.18878	-0.161385
YGL061C	DUO1	n/a	n/a	n/a
YNL126W	SPC98	0.93575	n/a	n/a

## Sheet: mad1-A736T-GBP control
ORF	Gene Name	Mean Log Growth Ratio
YMR168C	CEP3	0.346585
YKL049C	CSE4	0.33561
YJR089W	BIR1	0.25215
YHR102W	KIC1	0.2169
YGR188C	BUB1	0.147255
YLR315W	NKP2	0.12455
YCL029C	BIK1	0.114525
YLR381W	CTF3	0.111055
YIL031W	ULP2	0.102885
YPL269W	KAR9	0.10228
YPL155C	KIP2	0.1022
YGL060W	YBP2	0.085415
YFR028C	CDC14	0.083715
YPL209C	IPL1	0.083505
YDR254W	CHL4	0.083365
YLR212C	TUB4	0.083015
YLR045C	STU2	0.081865
YAL034W-A	MTW1	0.08147
YGL216W	KIP3	0.08134
YBR156C	SLI15	0.074745
YIL106W	MOB1	0.07443
YGL086W	MAD1	0.07166
YJL030W	MAD2	0.07154
Control	n/a	0.067795
YMR001C	CDC5	0.065875
YKR054C	DYN1	0.058055
YBL079W	NUP170	0.05792
YGL061C	DUO1	0.054495
YPL233W	NSL1	0.05356
YDR424C	DYN2	0.05217
YKL089W	MIF2	0.050555
YEL061C	CIN8	0.04933
YDL134C	PPH21	0.045755
YDR320C-A	DAD4	0.04154
YBL063W	KIP1	0.038345
YAL016W	TPD3	0.03777
YDR201W	SPC19	0.036325
Control	n/a	0.034405
YOR269W	PAC1	0.03168
YHR172W	SPC97	0.031085
YDR439W	LRS4	0.03011
YOR026W	BUB3	0.02939
YOL069W	NUF2	0.026795
YDR318W	MCM21	0.02662
YJR112W	NNF1	0.02531
YDL028C	MPS1	0.022925
YBR010W	HHT1	0.02102
YER016W	BIM1	0.01951
YGR140W	CBF2	0.018495
YJL013C	MAD3	0.017985
YDR328C	SKP1	0.015865
YER105C	NUP157	0.015795
YMR153W	NUP53	0.015465
Control	n/a	0.005635
YJR135C	MCM22	3.5e-05
YOR073W	SGO1	-0.00068
YGL116W	CDC20	-0.00329
YDR016C	DAD1	-0.00507
YJR060W	CBF1	-0.005755
YDL188C	PPH22	-0.00888
Control	n/a	-0.00909
YER018C	SPC25	-0.010115
Control	n/a	-0.01157
YNL031C	HHT2	-0.012655
YBR009C	HHF1	-0.014655
Control	n/a	-0.016625
YOR057W	SGT1	-0.02063
YPR141C	KAR3	-0.026335
YNL164C	IBD2	-0.02703
YMR117C	SPC24	-0.029365
Control	n/a	-0.029385
YBL003C	HTA2	-0.03207
YDL088C	ASM4	-0.032685
Control	n/a	-0.0328
YBL002W	HTB2	-0.03331
YIR010W	DSN1	-0.036175
YOR195W	SLK19	-0.040685
YPR046W	MCM16	-0.045305
YGL093W	SPC105	-0.04651
YDR225W	HTA1	-0.04657
YDR532C	KRE28	-0.05362
YCR086W	CSM1	-0.05777
YIL144W	NDC80	-0.07002
YKR083C	DAD2	-0.077525
YBR107C	IML3	-0.098335
YBR211C	AME1	-0.10493
YKR037C	SPC34	-0.11106
YFR046C	CNN1	-0.12927
YDR224C	HTB1	-0.18003
YGR179C	OKP1	-0.18246
YER133W	GLC7	-0.212895
YPL018W	CTF19	-0.220675
YBR233W-A	DAD3	-0.248025
YBL034C	STU1	-0.261295
YKL042W	SPC42	-0.412825
YNL126W	SPC98	n/a

## Sheet: mad1-RLK-AAA-GBP control
ORF	Gene Name	Mean Log Growth Ratio
YKL049C	CSE4	0.161075
YKR037C	SPC34	0.159555
YBR009C	HHF1	0.139445
YDR224C	HTB1	0.06471
YBR233W-A	DAD3	0.048705
YJR089W	BIR1	0.04759
YJR112W	NNF1	0.03824
Control	n/a	0.030795
Control	n/a	0.03049
Control	n/a	0.0265
Control	n/a	0.024325
YPL233W	NSL1	0.02234
YDR320C-A	DAD4	0.009815
YBL079W	NUP170	0.00765
YEL061C	CIN8	-0.001055
YDL134C	PPH21	-0.00127
YBL003C	HTA2	-0.00804
Control	n/a	-0.008905
YDR225W	HTA1	-0.009745
YNL164C	IBD2	-0.015125
YMR168C	CEP3	-0.01514
YJL030W	MAD2	-0.01629
YDR532C	KRE28	-0.020245
YDR328C	SKP1	-0.024325
YBR211C	AME1	-0.02914
Control	n/a	-0.031245
YGR188C	BUB1	-0.032125
YBL002W	HTB2	-0.038075
YER018C	SPC25	-0.043595
YCL029C	BIK1	-0.044275
YGR179C	OKP1	-0.04453
YPL209C	IPL1	-0.046475
YOL069W	NUF2	-0.052275
YDR439W	LRS4	-0.0551
YOR026W	BUB3	-0.05829
Control	n/a	-0.05882
YDL028C	MPS1	-0.059655
YGL060W	YBP2	-0.061345
YMR153W	NUP53	-0.06436
YDL188C	PPH22	-0.06782
YDR424C	DYN2	-0.068935
YDR016C	DAD1	-0.069435
YJL013C	MAD3	-0.070075
YAL034W-A	MTW1	-0.071645
YPL269W	KAR9	-0.076735
YER105C	NUP157	-0.083795
YDR201W	SPC19	-0.08593
YBR010W	HHT1	-0.086875
YKR054C	DYN1	-0.093935
YBR156C	SLI15	-0.09531
YMR001C	CDC5	-0.09557
YLR315W	NKP2	-0.095685
YJR135C	MCM22	-0.09597
YPR141C	KAR3	-0.101695
YGL216W	KIP3	-0.10458
YDR318W	MCM21	-0.10514
YOR057W	SGT1	-0.10614
YKR083C	DAD2	-0.10685
YGL086W	MAD1	-0.108995
YPR046W	MCM16	-0.110595
YOR269W	PAC1	-0.1109
YBL063W	KIP1	-0.116485
YAL016W	TPD3	-0.116505
YPL018W	CTF19	-0.119955
YCR086W	CSM1	-0.12237
YPL155C	KIP2	-0.12299
YBL034C	STU1	-0.123825
YDL088C	ASM4	-0.124355
YLR212C	TUB4	-0.125015
YLR045C	STU2	-0.131445
YBR107C	IML3	-0.137055
YOR073W	SGO1	-0.14649
YGR140W	CBF2	-0.15313
YNL031C	HHT2	-0.154485
YFR028C	CDC14	-0.158965
YGL116W	CDC20	-0.16329
YIL144W	NDC80	-0.164895
Control	n/a	-0.165345
YHR172W	SPC97	-0.16652
YDR254W	CHL4	-0.173065
YFR046C	CNN1	-0.17529
YMR117C	SPC24	-0.17744
YER016W	BIM1	-0.19194
YIL106W	MOB1	-0.192055
YLR381W	CTF3	-0.195825
YGL093W	SPC105	-0.196175
YJR060W	CBF1	-0.2051
YIR010W	DSN1	-0.20524
YOR195W	SLK19	-0.205775
YIL031W	ULP2	-0.21893
YHR102W	KIC1	-0.22961
YER133W	GLC7	-0.23441
YKL089W	MIF2	-0.266785
YKL042W	SPC42	-0.28583
YNL126W	SPC98	n/a
YGL061C	DUO1	n/a

## Sheet: mad1-RIL-AAA-GBP control
ORF	Gene Name	Mean Log Growth Ratio
YLR045C	STU2	0.20929
YMR168C	CEP3	0.20228
YJR089W	BIR1	0.201725
YLR381W	CTF3	0.141315
YFR028C	CDC14	0.108095
YDL134C	PPH21	0.105745
YLR212C	TUB4	0.10423
YGL060W	YBP2	0.093845
YGL061C	DUO1	0.08319
YDR254W	CHL4	0.08198
YCL029C	BIK1	0.077275
YIL106W	MOB1	0.076305
YAL034W-A	MTW1	0.075055
YKR054C	DYN1	0.073555
YMR001C	CDC5	0.06793
YGL216W	KIP3	0.06631
YGR188C	BUB1	0.0636
YIL031W	ULP2	0.060885
YPL233W	NSL1	0.06005
YDR201W	SPC19	0.05264
Control	n/a	0.051705
YDL028C	MPS1	0.04852
YPL269W	KAR9	0.04714
YGL086W	MAD1	0.04678
YJL030W	MAD2	0.04559
YBL079W	NUP170	0.04499
YOR269W	PAC1	0.04477
YJR112W	NNF1	0.044415
YJR135C	MCM22	0.04414
YHR102W	KIC1	0.04187
YDR424C	DYN2	0.04043
YGL116W	CDC20	0.03814
YOR057W	SGT1	0.036485
YNL031C	HHT2	0.034445
Control	n/a	0.03197
YDR320C-A	DAD4	0.03165
YJL013C	MAD3	0.02971
YJR060W	CBF1	0.02885
YER016W	BIM1	0.02466
YHR172W	SPC97	0.024155
YKL049C	CSE4	0.02321
YDR439W	LRS4	0.022865
YOR026W	BUB3	0.01967
YDR532C	KRE28	0.018735
Control	n/a	0.017905
YMR153W	NUP53	0.017485
YPR046W	MCM16	0.016595
YPL155C	KIP2	0.01538
Control	n/a	0.01494
YEL061C	CIN8	0.01292
YBR010W	HHT1	0.01109
YER018C	SPC25	0.010955
YIR010W	DSN1	0.007215
YOR195W	SLK19	0.00389
YER105C	NUP157	0.00017
YIL144W	NDC80	-0.00286
YDL088C	ASM4	-0.003
YPR141C	KAR3	-0.003035
Control	n/a	-0.00435
YBL063W	KIP1	-0.005155
YOR073W	SGO1	-0.00586
YGR140W	CBF2	-0.00597
YDR225W	HTA1	-0.006345
YDL188C	PPH22	-0.00656
Control	n/a	-0.00817
YKL089W	MIF2	-0.008695
YOL069W	NUF2	-0.010215
YNL164C	IBD2	-0.01162
YDR328C	SKP1	-0.01354
YMR117C	SPC24	-0.017335
Control	n/a	-0.01766
YBL002W	HTB2	-0.02492
YBL003C	HTA2	-0.025575
YDR318W	MCM21	-0.02588
YGL093W	SPC105	-0.0273
YBR009C	HHF1	-0.029405
Control	n/a	-0.03044
YCR086W	CSM1	-0.03133
YBR107C	IML3	-0.033005
YAL016W	TPD3	-0.04827
YDR016C	DAD1	-0.049765
YKR083C	DAD2	-0.0514
YFR046C	CNN1	-0.081345
YKR037C	SPC34	-0.08464
YLR315W	NKP2	-0.105455
YKL042W	SPC42	-0.139905
YDR224C	HTB1	-0.14941
YER133W	GLC7	-0.15402
YPL209C	IPL1	-0.185545
YBR211C	AME1	-0.19101
YBR156C	SLI15	-0.21709
YPL018W	CTF19	-0.260805
YBR233W-A	DAD3	-0.27367
YBL034C	STU1	-0.27603
YGR179C	OKP1	-0.31055
YNL126W	SPC98	n/a

## Sheet: Short 4A linker
ORF	Gene Name	GBP control Log Growth Ratio	MAD1 control Log Growth Ratio	Mean Log Growth Ratio		ORF	Gene Name	mad1-A736T-GBP control Log Growth Ratio
YGR140W	NDC10	1.42802	1.20235	1.31519		YMR168C	CEP3	0.4462
YKL049C	CSE4	1.38545	1.23362	1.30953		YKL049C	CSE4	0.408355
YMR168C	CEP3	1.06633	1.08769	1.07701		YPL209C	IPL1	0.37552
YKL042W	SPC42	0.722	0.91724	0.81962		YJR089W	BIR1	0.31658
YKL089W	MIF2	1.03212	0.5076	0.76986		YHR102W	KIC1	0.215665
YHR102W	KIC1	0.5595	0.68594	0.62272		YGR188C	BUB1	0.166395
YPL209C	IPL1	0.524	0.64123	0.582615		YBR156C	SLI15	0.13989
YBR156C	SLI15	0.38827	0.55103	0.46965		YGR140W	CBF2	0.138265
YGL116W	CDC20	0.60916	0.27247	0.440815		YJR112W	NNF1	0.12513
YGR188C	BUB1	0.43221	0.4427	0.437455		YCL029C	BIK1	0.10045
YJR089W	BIR1	0.40262	0.46192	0.43227		YAL034W-A	MTW1	0.091695
YER016W	BIM1	0.3322	0.4202	0.3762		YGL116W	CDC20	0.08401
YDR318W	MCM21	0.27198	0.26357	0.267775		YOL069W	NUF2	0.07456
YHR172W	SPC97	0.20868	0.2878	0.24824		YDR016C	DAD1	0.064335
YBR233W-A	DAD3	0.15569	0.25801	0.20685		YPR141C	KAR3	0.062225
YPL018W	CTF19	0.21418	0.1993	0.20674		YGL216W	KIP3	0.05531
YLR315W	NKP2	0.23285	0.14092	0.186885		YLR315W	NKP2	0.05251
YJR135C	MCM22	0.19428	0.15777	0.176025		YJL030W	MAD2	0.05193
YLR381W	CTF3	0.20518	0.12702	0.1661		YKR054C	DYN1	0.050105
YGR179C	OKP1	0.19278	0.13924	0.16601		YIL106W	MOB1	0.043565
YFR028C	CDC14	0.12362	0.20343	0.163525		YPL155C	KIP2	0.039455
YBR211C	AME1	0.09989	0.22577	0.16283		YPL269W	KAR9	0.03795
YGL216W	KIP3	0.15124	0.1551	0.15317		YDL188C	PPH22	0.03335
YPR141C	KAR3	0.09619	0.19767	0.14693		YMR001C	CDC5	0.030915
YOL069W	NUF2	0.10049	0.18016	0.140325		YER016W	BIM1	0.03077
YPR046W	MCM16	0.16274	0.11746	0.1401		YLR381W	CTF3	0.028065
YIL031W	ULP2	0.16355	0.10438	0.133965		YIL031W	ULP2	0.02436
YDR439W	LRS4	0.18983	0.0734	0.131615		Control	n/a	0.02434
YMR001C	CDC5	0.07625	0.16862	0.122435		YDR254W	CHL4	0.023815
YDR424C	DYN2	0.1418	0.1029	0.12235		YPL233W	NSL1	0.02322
YDR016C	DAD1	0.15233	0.09213	0.12223		YFR028C	CDC14	0.02224
YDL188C	PPH22	0.09022	0.15326	0.12174		YDL028C	MPS1	0.019265
YOR269W	PAC1	0.07232	0.16802	0.12017		YAL016W	TPD3	0.019035
YOR073W	SGO1	0.10801	0.12673	0.11737		Control	n/a	0.01897
YER133W	GLC7	0.03993	0.19065	0.11529		YBL003C	HTA2	0.01892
YAL034W-A	MTW1	0.11776	0.10974	0.11375		YNL031C	HHT2	0.018515
YOR195W	SLK19	0.07035	0.14977	0.11006		YOR073W	SGO1	0.01819
YBR107C	IML3	0.14548	0.06264	0.10406		YKL089W	MIF2	0.017805
YBR010W	HHT1	0.16306	0.03349	0.098275		YDL134C	PPH21	0.016755
YDR254W	CHL4	0.20898	-0.01719	0.095895		YBL063W	KIP1	0.016515
YCL029C	BIK1	0.07277	0.11163	0.0922		YDR201W	SPC19	0.016475
YMR117C	SPC24	0.08046	0.10174	0.0911		YDR439W	LRS4	0.01629
YBL063W	KIP1	0.0944	0.08527	0.089835		YHR172W	SPC97	0.015345
YKR054C	DYN1	0.08956	0.08741	0.088485		Control	n/a	0.01378
Control	n/a	0.0734	0.10119	0.087295		YDR318W	MCM21	0.01249
YPL269W	KAR9	0.0781	0.09645	0.087275		YGL060W	YBP2	0.011025
YIL106W	MOB1	0.03496	0.12476	0.07986		Control	n/a	0.009065
YCR086W	CSM1	0.04389	0.115	0.079445		YLR212C	TUB4	0.008675
YDR224C	HTB1	0.06027	0.08921	0.07474		YOR269W	PAC1	0.00215
YDR201W	SPC19	0.09941	0.0338	0.066605		YLR045C	STU2	-0.000545
YDR225W	HTA1	0.09667	0.01712	0.056895		Control	n/a	-0.005185
YJR060W	CBF1	0.05806	0.04905	0.053555		YJR135C	MCM22	-0.006095
YPL155C	KIP2	0.10774	-0.00556	0.05109		Control	n/a	-0.00748
YPL233W	NSL1	0.0676	0.03203	0.049815		YCR086W	CSM1	-0.01086
YER018C	SPC25	0.00518	0.0905	0.04784		YJL013C	MAD3	-0.01265
YDL134C	PPH21	0.01745	0.07356	0.045505		YMR153W	NUP53	-0.02037
YFR046C	CNN1	0.03622	0.04631	0.041265		YPR046W	MCM16	-0.020505
YGL060W	YBP2	0.00236	0.07712	0.03974		YNL164C	IBD2	-0.02093
YOR026W	BUB3	-0.02448	0.10066	0.03809		YDR424C	DYN2	-0.0219
YER105C	NUP157	0.00607	0.06887	0.03747		YIL144W	NDC80	-0.02416
YNL031C	HHT2	0.02614	0.03723	0.031685		YGL086W	MAD1	-0.02506
YOR057W	SGT1	0.0137	0.0476	0.03065		YEL061C	CIN8	-0.02645
YGL086W	MAD1	-0.02561	0.08222	0.028305		YDR225W	HTA1	-0.02769
Control	n/a	0.03433	0.02031	0.02732		YBR211C	AME1	-0.03071
Control	n/a	0.02604	0.02455	0.025295		YDR328C	SKP1	-0.03078
YJL030W	MAD2	-0.04543	0.09447	0.02452		YOR026W	BUB3	-0.03272
Control	n/a	0.02917	0.01809	0.02363		YER018C	SPC25	-0.034535
YAL016W	TPD3	0.04515	-0.00523	0.01996		YOR057W	SGT1	-0.034665
YDR328C	SKP1	0.01185	0.02804	0.019945		YOR195W	SLK19	-0.03811
YDL088C	ASM4	-0.0339	0.07254	0.01932		YFR046C	CNN1	-0.04164
YJR112W	NNF1	-0.02301	0.05562	0.016305		YBL079W	NUP170	-0.041805
YKR037C	SPC34	-0.0027	0.01675	0.007025		YBR010W	HHT1	-0.042875
Control	n/a	0.02135	-0.0107	0.005325		YMR117C	SPC24	-0.046245
YLR212C	TUB4	0.01054	-0.00103	0.004755		YIR010W	DSN1	-0.051215
Control	n/a	-0.01308	0.0135	0.00021		YDR532C	KRE28	-0.054245
YMR153W	NUP53	0.00408	-0.02352	-0.00972		YJR060W	CBF1	-0.05683
Control	n/a	-0.02745	-0.00379	-0.01562		YER105C	NUP157	-0.05919
YBL079W	NUP170	-0.0544	0.01008	-0.02216		YKR083C	DAD2	-0.0639
YIL144W	NDC80	-0.05235	0.00323	-0.02456		YDR224C	HTB1	-0.06849
YBL003C	HTA2	-0.07602	0.01674	-0.02964		YER133W	GLC7	-0.07016
YDR320C-A	DAD4	-0.04828	-0.01715	-0.032715		YGR179C	OKP1	-0.070745
YBL034C	STU1	-0.05587	-0.01377	-0.03482		YDR320C-A	DAD4	-0.071455
YBL002W	HTB2	-0.06008	-0.01115	-0.035615		YBR009C	HHF1	-0.07203
YDL028C	MPS1	-0.07105	-0.00036	-0.035705		YDL088C	ASM4	-0.074755
YKR083C	DAD2	-0.03487	-0.03872	-0.036795		Control	n/a	-0.078565
YBR009C	HHF1	-0.07922	-0.03742	-0.05832		Control	n/a	-0.080675
YIR010W	DSN1	-0.04955	-0.06992	-0.059735		YGL093W	SPC105	-0.08686
YNL164C	IBD2	-0.09325	-0.06804	-0.080645		YBL002W	HTB2	-0.087115
YDR532C	KRE28	-0.10605	-0.06153	-0.08379		YBR107C	IML3	-0.105635
YJL013C	MAD3	-0.12366	-0.05603	-0.089845		YBR233W-A	DAD3	-0.14026
Control	n/a	-0.03927	-0.15956	-0.099415		YPL018W	CTF19	-0.141655
YLR045C	STU2	-0.08373	-0.13852	-0.111125		YKR037C	SPC34	-0.178505
YEL061C	CIN8	-0.09816	-0.13386	-0.11601		YKL042W	SPC42	-0.22289
YGL093W	SPC105	-0.09772	-0.1856	-0.14166		YBL034C	STU1	-0.23512
YNL126W	SPC98	n/a	n/a	n/a		YGL061C	DUO1	n/a
YGL061C	DUO1	n/a	n/a	n/a		YNL126W	SPC98	n/a

## Sheet: mad3∆ data
	mad1-A736T control Log Growth Ratio				short linker mad1-A736T-4A-GBP control Log Growth Ratio
GFP strain	WT	mad3∆		GFP strain	WT	mad3∆
Cep3	0.5524	0.63153		Cdc20	0.51083	0.07756
Cdc20	0.28451	-0.16428		Cep3	0.45387	0.40594
Ndc10	0.22056	0.27357		Ndc10	0.36917	0.4153
Bir1	0.01796	-0.1574		Sli15	0.28183	0.59074
Sli15	0.01614	0.2136		Bir1	0.25187	0.08964
Mif2	0.00442	0.17414		Ipl1	0.1974	0.26618
Mtw1	-0.09386	0.19155		Nuf2	0.08831	0.07251
Nsl1	-0.1185	0.05599		Dsn1	0.0549	0.16074
Mcm21	-0.1349	-0.05618		Ame1	0.05437	0.16593
Bik1	-0.14815	-0.17444		Nnf1	0.04628	0.19549
Cbf1	-0.14929	-0.23937		Kre28	0.04595	0.03399
Bub3	-0.15725	-0.18815		Mcm21	0.01298	0.17317
Nuf2	-0.16643	-0.12469		Bub3	0.00971	-0.00056
Ame1	-0.17231	-0.1347		Mif2	0.00461	0.28672
Stu2	-0.17459	-0.07434		Bik1	0	0.0156
Ipl1	-0.18206	-0.0277		Cdc14	-0.00711	0.0006
Nnf1	-0.19622	0.04546		Cbf1	-0.02571	0.00829
Kre28	-0.21314	-0.15775		Mtw1	-0.02572	0.18008
Cdc14	-0.21509	-0.18335		Stu2	-0.03082	0.09489
Dsn1	-0.22951	-0.13777		Ctf19	-0.04624	0.1898
Dad3	-0.27125	0.20164		Dad3	-0.06343	0.24575
Ctf19	-0.29243	-0.09044		Nsl1	-0.08696	0.06362
Cse4	n/a	n/a		Cse4	n/a	n/a
