# Supplementary material for: Synthetic Physical Interactions Map Kinetochore-Checkpoint Activation Regions
Source: G3 (Bethesda). 2016 Jun 8;6(8):2531–42. doi: 10.1534/g3.116.031930 (PMC4978906; doi:10.1534/g3.116.031930)
Supplement: Supplemental Material [file supp_g3.116.031930_FileS4.xlsx]

## Sheet: GBP & MPS1 controls
ORF	Gene Name	GBP control Log Growth Ratio	MPS1 control Log Growth Ratio	Mean Log Growth Ratio
YJR112W	NNF1	1.94804	1.89125	1.91965
YIL144W	NDC80	1.36993	1.28094	1.32544
YGR188C	BUB1	1.32104	1.32738	1.32421
YDR532C	KRE28	1.13149	1.13355	1.13252
YIR010W	DSN1	1.17795	1.08632	1.13213
YAL034W-A	MTW1	1.14592	1.06845	1.10718
YOL069W	NUF2	1.06985	1.08168	1.07577
YGL093W	SPC105	1.13793	0.99172	1.06483
YPL233W	NSL1	0.96076	0.95928	0.96002
YGL086W	MAD1	0.8998	0.92355	0.911675
YER018C	SPC25	0.72937	0.67021	0.69979
YMR117C	SPC24	0.71962	0.64066	0.68014
YOR026W	BUB3	0.53635	0.59031	0.56333
YKL089W	MIF2	0.67944	0.07154	0.37549
YKL049C	CSE4	0.51793	0.22203	0.36998
YAL016W	TPD3	0.21714	0.14902	0.18308
YBR211C	AME1	0.16086	0.1904	0.17563
YBR009C	HHF1	0.2905	0.06055	0.175525
YKL042W	SPC42	0.12019	0.2035	0.161845
YLR315W	NKP2	0.19717	0.1212	0.159185
YOR073W	SGO1	0.1429	0.13491	0.138905
YPL018W	CTF19	0.17318	0.0857	0.12944
YBR156C	SLI15	0.07271	0.17449	0.1236
YDR318W	MCM21	0.14808	0.04525	0.096665
YPR141C	KAR3	0.09504	0.08782	0.09143
YBL003C	HTA2	0.05588	0.11651	0.086195
YJL013C	MAD3	0.03776	0.13239	0.085075
YNL031C	HHT2	0.06979	0.09033	0.08006
YJL030W	MAD2	0.02706	0.132	0.07953
YBL079W	NUP170	0.03829	0.11168	0.074985
YOR195W	SLK19	0.08372	0.05916	0.07144
YBL002W	HTB2	0.07478	0.06563	0.070205
YPR046W	MCM16	0.09923	0.03554	0.067385
Control	n/a	0.068	0.05003	0.059015
YNL164C	IBD2	0.06342	0.04799	0.055705
YDR439W	LRS4	0.07525	0.02365	0.04945
YER016W	BIM1	0.03721	0.06159	0.0494
YJR135C	MCM22	0.0927	-0.00036	0.04617
YOR269W	PAC1	0.07045	0.02017	0.04531
YDR201W	SPC19	0.07828	0.00857	0.043425
YER133W	GLC7	0.12127	-0.03662	0.042325
YER105C	NUP157	0.09763	-0.01439	0.04162
YGR179C	OKP1	0.06951	0.01325	0.04138
YBR010W	HHT1	0.07084	0.00762	0.03923
YDR424C	DYN2	0.07147	0.00386	0.037665
YLR212C	TUB4	0.03073	0.04363	0.03718
YEL061C	CIN8	0.01221	0.04834	0.030275
YFR028C	CDC14	0.00173	0.05874	0.030235
YHR172W	SPC97	0.0324	0.00442	0.01841
YDL028C	MPS1	0.02366	0.00612	0.01489
YBR107C	IML3	0.08326	-0.05425	0.014505
YKR054C	DYN1	0.02177	0.00572	0.013745
YPL269W	KAR9	0.02953	-0.00957	0.00998
YGL216W	KIP3	0.01865	-0.00353	0.00756
YDL088C	ASM4	0.04614	-0.0365	0.00482
YCR086W	CSM1	0.04289	-0.03589	0.0035
YIL106W	MOB1	-0.00029	0.00535	0.00253
YKR037C	SPC34	-0.07176	0.07523	0.001735
Control	n/a	0.00769	-0.00427	0.00171
YGR140W	NDC10	0.23892	-0.23624	0.00134
YDR254W	CHL4	0.07667	-0.07764	-0.000485
YKR083C	DAD2	0.04638	-0.05148	-0.00255
YDR328C	SKP1	0.03804	-0.04374	-0.00285
YDR320C-A	DAD4	-0.03441	0.02786	-0.003275
Control	n/a	-0.03126	0.01775	-0.006755
YCL029C	BIK1	0.00312	-0.01667	-0.006775
YLR045C	STU2	0.01311	-0.02775	-0.00732
YHR102W	KIC1	-0.00316	-0.02249	-0.012825
Control	n/a	-0.0124	-0.01661	-0.014505
Control	n/a	-0.00371	-0.02968	-0.016695
YJR089W	BIR1	0.00698	-0.04146	-0.01724
YDR225W	HTA1	0.01377	-0.05351	-0.01987
YIL031W	ULP2	0.06164	-0.1123	-0.02533
YMR001C	CDC5	-0.00953	-0.04367	-0.0266
YMR153W	NUP53	0.00467	-0.06038	-0.027855
YBL063W	KIP1	0.00376	-0.0787	-0.03747
Control	n/a	-0.04464	-0.04418	-0.04441
YDR016C	DAD1	-0.00843	-0.09741	-0.05292
YPL209C	IPL1	-0.09584	-0.02367	-0.059755
YMR168C	CEP3	-0.05296	-0.06902	-0.06099
YNL126W	SPC98	0.26095	-0.39083	-0.06494
Control	n/a	-0.03489	-0.09839	-0.06664
YPL155C	KIP2	-0.06223	-0.07885	-0.07054
YGL061C	DUO1	-0.2033	0.06175	-0.070775
YJR060W	CBF1	-0.00492	-0.14869	-0.076805
YFR046C	CNN1	0.0046	-0.17189	-0.083645
YDL188C	PPH22	-0.07033	-0.09986	-0.085095
YLR381W	CTF3	0.01204	-0.19023	-0.089095
Control	n/a	-0.08925	-0.10505	-0.09715
YDL134C	PPH21	-0.06658	-0.1315	-0.09904
YGL060W	YBP2	-0.08226	-0.12115	-0.101705
YOR057W	SGT1	-0.08662	-0.132	-0.10931
YDR224C	HTB1	-0.01259	-0.24348	-0.128035
YBR233W-A	DAD3	-0.07416	-0.20563	-0.139895
YBL034C	STU1	-0.17885	-0.24952	-0.214185
YGL116W	CDC20	0.83888	n/a	n/a

## Sheet: mps1-KD-GBP control
ORF	Gene Name	Log Growth Ratio
YIL144W	NDC80	0.91412
YIR010W	DSN1	0.91378
YJR112W	NNF1	0.82207
YDR532C	KRE28	0.78223
YAL034W-A	MTW1	0.73716
YPL233W	NSL1	0.68646
YOL069W	NUF2	0.58545
YGL086W	MAD1	0.49521
YER018C	SPC25	0.40723
YOR026W	BUB3	0.34476
YBR009C	HHF1	0.20429
YGL093W	SPC105	0.16918
YDL134C	PPH21	0.11467
YAL016W	TPD3	0.11365
YDR318W	MCM21	0.11049
YPR046W	MCM16	0.09913
YDR225W	HTA1	0.09578
YBR010W	HHT1	0.09393
YBR156C	SLI15	0.09116
YJL013C	MAD3	0.0881
YBL002W	HTB2	0.08496
YDL028C	MPS1	0.08464
YDL088C	ASM4	0.08401
YJR135C	MCM22	0.08399
YMR001C	CDC5	0.08313
YDR201W	SPC19	0.08285
YIL106W	MOB1	0.08001
YKR054C	DYN1	0.07497
YLR315W	NKP2	0.06931
YLR212C	TUB4	0.06424
YPL018W	CTF19	0.06256
YNL164C	IBD2	0.05354
YMR153W	NUP53	0.04794
YNL031C	HHT2	0.04553
YDR016C	DAD1	0.04085
YHR102W	KIC1	0.03882
YDR254W	CHL4	0.03452
YOR057W	SGT1	0.03431
YIL031W	ULP2	0.02779
Control	n/a	0.02737
YBL079W	NUP170	0.02658
YPL269W	KAR9	0.02534
YLR381W	CTF3	0.02308
Control	n/a	0.02046
YDL188C	PPH22	0.01985
Control	n/a	0.01868
Control	n/a	0.01603
YBL003C	HTA2	0.01538
YDR224C	HTB1	0.01479
YKR083C	DAD2	0.01145
YJR060W	CBF1	0.01112
Control	n/a	0.00909
YFR046C	CNN1	0.00334
YDR328C	SKP1	0.00233
YHR172W	SPC97	-0.00442
Control	n/a	-0.00708
Control	n/a	-0.0087
YBR107C	IML3	-0.0173
YER105C	NUP157	-0.01804
YBR211C	AME1	-0.01982
YEL061C	CIN8	-0.02268
YGL216W	KIP3	-0.02521
YDR439W	LRS4	-0.02559
YKR037C	SPC34	-0.04091
YGL060W	YBP2	-0.04574
YDR424C	DYN2	-0.06156
YJR089W	BIR1	-0.06608
YFR028C	CDC14	-0.07085
YPL155C	KIP2	-0.07306
YPL209C	IPL1	-0.0861
YJL030W	MAD2	-0.09056
YMR117C	SPC24	-0.0908
YBL063W	KIP1	-0.12186
YDR320C-A	DAD4	-0.12253
YER133W	GLC7	-0.12508
YBL034C	STU1	-0.13442
YGR179C	OKP1	-0.13627
YLR045C	STU2	-0.17035
YBR233W-A	DAD3	-0.18072
YCL029C	BIK1	-0.18565
YPR141C	KAR3	-0.22208
YER016W	BIM1	-0.23807
Control	n/a	-0.25964
YOR195W	SLK19	-0.2742
YKL089W	MIF2	-0.28469
YGL061C	DUO1	-0.30293
YKL049C	CSE4	-0.31273
YGR188C	BUB1	-0.35856
YNL126W	SPC98	-0.38126
YMR168C	CEP3	-0.44495
YOR269W	PAC1	-0.60669
YOR073W	SGO1	-0.74352
YCR086W	CSM1	-0.79676
YGR140W	NDC10	-0.84946
YKL042W	SPC42	-1.01342
YGL116W	CDC20	n/a

## Sheet: mad3∆ data mps1-kd-GBP control
	mps1-KD-GBP control Log Growth Ratio
GFP strain	WT	mad3∆
Kre28	0.67016	0.01886
Nnf1	0.57207	-0.06377
Nsl1	0.53237	-0.09719
Nuf2	0.51405	-0.07751
Mtw1	0.49131	-0.12686
Bub3	0.15016	0.04095
Dsn1	0.08243	0.27623
Sli15	0.07069	0.1314
Ctf19	-0.04637	-0.11123
Mcm21	-0.06254	-0.12027
Ipl1	-0.09483	-0.05204
Bir1	-0.11274	-0.07049
Ame1	-0.15066	-0.04954
Cbf1	-0.15956	-0.13893
Cdc14	-0.16728	-0.2242
Mif2	-0.16896	-0.14511
Stu2	-0.17476	-0.19533
Bik1	-0.19897	-0.21665
Dad3	-0.21837	-0.01445
Cep3	-1.01505	-0.5279
Ndc10	-1.05908	-0.94866
Cse4	n/a	n/a
Cdc20	n/a	n/a

## Sheet: mad1,3∆ data GBP control
ID Column	WT	mad3∆	mad1∆
Ndc80	1.67485	0.27996	-0.05355
Spc105	1.65562	0.31464	-0.23352
Kre28	1.12981	0.12534	-0.17481
Mtw1	1.32773	0.0015	N/A
Nuf2	1.13914	0.0174	N/A
Nnf1	2.12794	0.18737	N/A
Nsl1	0.9675	-0.08594	N/A
Dsn1	0.03247	0.35508	N/A
Bub1	1.46983	0.22535	0.08745
Bub3	0.43125	0.29219	N/A
Cdc20	1.19785	1.30782	N/A
Ame1	0.04329	-0.00613	-0.09773
Ctf19	0.09741	0.02695	N/A
Mif2	0.6569	0.9058	N/A
Ndc10	0.33447	0.22631	N/A
Cep3	-0.28483	-0.20412	N/A
Mcm21	-0.07335	-0.09967	N/A
Cbf1	-0.08818	-0.10349	N/A
Bir1	0.03529	0.03195	N/A
Sli15	0.01361	0.06656	N/A
Ipl1	0.00998	-0.04465	N/A
Dad3	-0.07538	0.29046	N/A
Stu2	-0.06182	-0.06143	N/A
Bik1	-0.09704	-0.14013	N/A
Cdc14	-0.03806	-0.07921	N/A
Control	0.00975472	-0.09742	N/A
