# Supplementary material for: Synthetic Physical Interactions Map Kinetochore-Checkpoint Activation Regions
Source: G3 (Bethesda). 2016 Jun 8;6(8):2531–42. doi: 10.1534/g3.116.031930 (PMC4978906; doi:10.1534/g3.116.031930)
Supplement: Supplemental Material [file supp_g3.116.031930_TableS1.xlsx]

## Sheet: Sheet1
Supplementary Table S1. List of GFP strains used in our kinetochore-specific SPI screens
All GFP library strains are based upon BY4741 (MATa his3Δ1 leu2Δ0 met15Δ0 ura3Δ0 XXX-GFP::HIS3). Controls are WT BY4741 with no GFP.
Row	Column	ORF tagged with GFP	Gene Name
A	1	YDL088C	ASM4
A	2	YER105C	NUP157
A	3	YBL079W	NUP170
A	4	YMR153W	NUP53
A	5	YDR016C	DAD1
A	6	YKL049C	CSE4
A	7	YDR225W	HTA1
A	8	YLR315W	NKP2
A	9	YDR201W	SPC19
A	10	YDR424C	DYN2
A	11	YDR320C-A	DAD4
A	12	YBR010W	HHT1
B	1	Control	n/a
B	2	YBL002W	HTB2
B	3	YNL031C	HHT2
B	4	YDR224C	HTB1
B	5	YBR009C	HHF1
B	6	YKR083C	DAD2
B	7	YBL003C	HTA2
B	8	YBR233W-A	DAD3
B	9	YPR046W	MCM16
B	10	YJR135C	MCM22
B	11	YPL233W	NSL1
B	12	YDR328C	SKP1
C	1	YMR117C	SPC24
C	2	YCR086W	CSM1
C	3	Control	n/a
C	4	YJR112W	NNF1
C	5	YER018C	SPC25
C	6	YJL030W	MAD2
C	7	YDR318W	MCM21
C	8	YAL034W-A	MTW1
C	9	YKR037C	SPC34
C	10	Control	n/a
C	11	YGL061C	DUO1
C	12	YBR107C	IML3
D	1	YJR060W	CBF1
D	2	YNL164C	IBD2
D	3	YFR046C	CNN1
D	4	YDL188C	PPH22
D	5	Control	n/a
D	6	YDL134C	PPH21
D	7	YBR211C	AME1
D	8	YOR026W	BUB3
D	9	YPL209C	IPL1
D	10	YPL018W	CTF19
D	11	YDR439W	LRS4
D	12	YER016W	BIM1
E	1	YIL106W	MOB1
E	2	YKL042W	SPC42
E	3	YOL069W	NUF2
E	4	YOR057W	SGT1
E	5	YDR532C	KRE28
E	6	YGR179C	OKP1
E	7	Control	n/a
E	8	YCL029C	BIK1
E	9	YOR269W	PAC1
E	10	YER133W	GLC7
E	11	YDR254W	CHL4
E	12	YKL089W	MIF2
F	1	YLR212C	TUB4
F	2	YFR028C	CDC14
F	3	YJL013C	MAD3
F	4	YMR168C	CEP3
F	5	YIL144W	NDC80
F	6	YGL060W	YBP2
F	7	YPL269W	KAR9
F	8	YAL016W	TPD3
F	9	Control	n/a
F	10	YIR010W	DSN1
F	11	YGL116W	CDC20
F	12	YOR073W	SGO1
G	1	YLR381W	CTF3
G	2	YPR141C	KAR3
G	3	YGL216W	KIP3
G	4	YDL028C	MPS1
G	5	YMR001C	CDC5
G	6	YBR156C	SLI15
G	7	YGL086W	MAD1
G	8	YNL126W	SPC98
G	9	YHR172W	SPC97
G	10	YPL155C	KIP2
G	11	Control	n/a
G	12	YOR195W	SLK19
H	1	YLR045C	STU2
H	2	YHR102W	KIC1
H	3	YKR054C	DYN1
H	4	YGR140W	CBF2
H	5	YBL034C	STU1
H	6	YJR089W	BIR1
H	7	YIL031W	ULP2
H	8	YBL063W	KIP1
H	9	YEL061C	CIN8
H	10	YGR188C	BUB1
H	11	YGL093W	SPC105
H	12	Control	n/a
