# Supplementary material for: Synthetic Physical Interactions Map Kinetochore-Checkpoint Activation Regions
Source: G3 (Bethesda). 2016 Jun 8;6(8):2531–42. doi: 10.1534/g3.116.031930 (PMC4978906; doi:10.1534/g3.116.031930)
Supplement: Supplemental Material [file supp_g3.116.031930_TableS2.xlsx]

## Sheet: Sheet1
Supplementary Table S2: Yeast strains used in this study.
Strain Name	Genetic Background	Relevant Genotype	Reference
W8164-2B	W303*	MATα CEN1-16::Gal-Kl-URA3	Reid et al. 2011.
All GFP strains	BY4741✣	MATa his3∆1 leu2∆0 met15∆0 ura3∆0 XXX-GFP::HIS3	Huh et al. 2003.
T81	BY4741	MATa CSE4-GFP::HIS3 mad3∆::KANMX	Ólafsson and Thorpe, 2015.
T82	BY4741	MATa CDC20-GFP::HIS3 mad3∆::KANMX	Ólafsson and Thorpe, 2015.
T83	BY4741	MATa NDC10-GFP::HIS3 mad3∆::KANMX	Ólafsson and Thorpe, 2015.
T84	BY4741	MATa IPL1-GFP::HIS3 mad3∆::KANMX	Ólafsson and Thorpe, 2015.
T85	BY4741	MATa BIR1-GFP::HIS3 mad3∆::KANMX	Ólafsson and Thorpe, 2015.
T414	BY4741	MATa NUF2-GFP::HIS3 mad3∆::KANMX	Ólafsson and Thorpe, 2015.
T415	BY4741	MATa NNF1-GFP::HIS3 mad3∆::KANMX	Ólafsson and Thorpe, 2015.
T416	BY4741	MATa MTW1-GFP::HIS3 mad3∆::KANMX	Ólafsson and Thorpe, 2015.
T417	BY4741	MATa CDC14-GFP::HIS3 mad3∆::KANMX	Ólafsson and Thorpe, 2015.
T418	BY4741	MATa KRE28-GFP::HIS3 mad3∆::KANMX	Ólafsson and Thorpe, 2015.
T419	BY4741	MATa NSL1-GFP::HIS3 mad3∆::KANMX	Ólafsson and Thorpe, 2015.
T420	BY4741	MATa CEP3-GFP::HIS3 mad3∆::KANMX	Ólafsson and Thorpe, 2015.
T421	BY4741	MATa DAD3-GFP::HIS3 mad3∆::KANMX	Ólafsson and Thorpe, 2015.
T422	BY4741	MATa BIK1-GFP::HIS3 mad3∆::KANMX	Ólafsson and Thorpe, 2015.
T423	BY4741	MATa BUB3-GFP::HIS3 mad3∆::KANMX	Ólafsson and Thorpe, 2015.
T424	BY4741	MATa MIF2-GFP::HIS3 mad3∆::KANMX	Ólafsson and Thorpe, 2015.
T425	BY4741	MATa CBF1-GFP::HIS3 mad3∆::KANMX	Ólafsson and Thorpe, 2015.
T426	BY4741	MATa SLI15-GFP::HIS3 mad3∆::KANMX	Ólafsson and Thorpe, 2015.
T427	BY4741	MATa AME1-GFP::HIS3 mad3∆::KANMX	Ólafsson and Thorpe, 2015.
T428	BY4741	MATa MCM21-GFP::HIS3 mad3∆::KANMX	Ólafsson and Thorpe, 2015.
T429	BY4741	MATa CTF19-GFP::HIS3 mad3∆::KANMX	Ólafsson and Thorpe, 2015.
T430	BY4741	MATa STU2-GFP::HIS3 mad3∆::KANMX	Ólafsson and Thorpe, 2015.
T431	BY4741	MATa DSN1-GFP::HIS3 mad3∆::KANMX	Ólafsson and Thorpe, 2015.
PT210-11D	W303	MATa ADE2 leu2-3,112 his3-11,15 ura3-1 TRP1 lys2∆ RAD5 ASK1-CFP MTW1-YFP	this study
T479	W303	MATα ADE2 leu2-3,112 TRP1 lys2∆ RAD5 MTW1-YFP SPC110-CFP::KANMX	this study
E433	BY4741	MATα his3∆1 leu2∆0 lys2∆0 ura3∆0 mad1∆::KANMX	Winzeler et al. 1999.
E434	BY4741	MATα his3∆1 leu2∆0 lys2∆0 ura3∆0 mad2∆::KANMX	Winzeler et al. 1999.
E435	BY4741	MATα his3∆1 leu2∆0 lys2∆0 ura3∆0 mad3∆::KANMX	Winzeler et al. 1999.
E436	BY4741	MATα his3∆1 leu2∆0 lys2∆0 ura3∆0 bub1∆::KANMX	Winzeler et al. 1999.
E437	BY4741	MATα his3∆1 leu2∆0 lys2∆0 ura3∆0 bub3∆::KANMX	Winzeler et al. 1999.
T501	W303	MATα ADE2 leu2-3,112 his3-11,15 ura3-1 TRP1 lys2∆ RAD5 ASK1-CFP BIR1-YFP::KANMX	Winzeler et al. 1999.
PT54-20D	W303	MATa TRP1 ura3::3xURA3-tetOx112 TetR-mRFP SMC1-YFP::KANMX HTA1-CFP	this study
PT15-18A	W303	MATa ADE2 TRP1 lys2Δ leu2-3,112 his3-11 cse4Δ::KANMX CSE4-GFPint::URA3	this study
T16	W303	MATα leu2-3,112 MTW1-YFP mad1∆::KANMX	this study
T77	BY4741	MATa CDC20-GFP::HIS3 mad1∆::KANMX	this study
T77	BY4741	MATa NDC10-GFP::HIS3 mad1∆::KANMX	this study
T79	BY4741	MATa IPL1-GFP::HIS3 mad1∆::KANMX	this study
T80	BY4741	MATa BIR1-GFP::HIS3 mad1∆::KANMX	this study
T541	BY4741	MATa CEP3-GFP::HIS3 mad1∆::KANMX	this study
T542	BY4741	MATa KRE28-GFP::HIS3 mad1∆::KANMX	this study
T543	BY4741	MATa NDC80-GFP::HIS3 mad1∆::KANMX	this study
T544	BY4741	MATa AME1-GFP::HIS3 mad1∆::KANMX	this study
T545	BY4741	MATa BUB1-GFP::HIS3 mad1∆::KANMX	this study
T546	BY4741	MATa SPC105-GFP::HIS3 mad1∆::KANMX	this study
T594	BY4741	MATa BUB1-GFP::HIS3 mad3∆::KANMX	this study
T595	BY4741	MATa SPC105-GFP::HIS3 mad3∆::KANMX	this study
T596	BY4741	MATa SPC105-GFP::HIS3 mad3∆::KANMX	this study
*W303 strains are ADE2+ RAD5+ derivatives of W303 (can1-100 his3-11,15 leu2-3,112 ura3-1) unless otherwise indicated.
✣GFP strains are all based upon BY4741 (his3∆1 leu2∆0 met15∆0 ura3∆0).
