# Supplementary material for: Synthetic Physical Interactions Map Kinetochore-Checkpoint Activation Regions
Source: G3 (Bethesda). 2016 Jun 8;6(8):2531–42. doi: 10.1534/g3.116.031930 (PMC4978906; doi:10.1534/g3.116.031930)
Supplement: Supplemental Material [file supp_g3.116.031930_TableS3.xlsx]

## Sheet: Sheet1
Table S3: Plasmids used in this study.
Plamid	Relevant genotype	Reference
pHT4	LEU2 pCUP1::GBP	Ólafsson and Thorpe, 2015.
pHT36	LEU2 pCUP1::MAD2-GBP	This study
pHT119	LEU2 pCUP1::MAD2	This study
pHT405	LEU2 pCUP1::mad2-L7A-GBP	This study
pHT406	LEU2 pCUP1::mad2-T133A,V188N-GBP	This study
pHT407	LEU2 pCUP1::mad2-RQ/AA-GBP	This study
pHT383	LEU2 pCUP1::mad2∆C-GBP	This study
pHT103	LEU2 pGAL	This study
pHT101	LEU2 pGAL::MAD2	This study
pHT110	LEU2 pGAL::CSE4	This study
pHT108	HIS3 pGAL::MAD2	This study
pHT115	LEU2 pGAL::MAD2-CSE4	This study
pHT187	LEU2 pGAL::CSE4-MAD2	This study
pHT199	LEU2 pGAL::GBP	This study
pHT186	LEU2 pGAL::MAD2-GBP	This study
pHT346	LEU2 pCUP1::MAD1	This study
pHT357	LEU2 pCUP1::MAD1-GBP	This study
pHT358	LEU2 pCUP1::mad1-RLK/AAA-GBP	This study
pHT401	LEU2 pCUP1::mad1-RIL/AAA-GBP	This study
pHT403	LEU2 pCUP1::mad1-A736T-GBP	This study
pHT359	LEU2 pCUP1::MAD1-4A-GBP	This study
pHT404	LEU2 pCUP1::mad1-A736T-4A-GBP	This study
pHT440	LEU2 pCUP1::MPS1-GBP	This study
pHT441	LEU2 pCUP1::MPS1	This study
pHT452	LEU2 pCUP1::mps1-D580A-GBP	This study
pHT487	NAT pGALS::spc105-6A-YFP	This study
pHT494	NAT pCUP1::GLC7	This study
All plasmids are based upon pWJ1512, which contains CEN6 and ARS209 (Reid et al., 2011).
